# Supplementary material for: An orbitally adapted push–pull template for N2 activation and reduction to diazene-diide
Source: Royal Society of Chemistry journal article supplement (doi:10.1039/d3sc04390h), 2023-01-01
Supplement: d3sc04390h1.pdf [file d3sc04390h1.pdf]

## An orbitally adapted push-pull template for N<sub>2</sub> activation and reduction to diazene-diide

David Specklin,<sup>a</sup> Marie-Christine Boegli,<sup>a</sup> Anaïs Coffinet,<sup>a</sup> Léon Escomel,<sup>a</sup> Laure Vendier,<sup>a</sup> Mary Grellier<sup>a</sup> and Antoine Simonneau<sup>\*a</sup>

*a* LCC-CNRS, Université de Toulouse, CNRS, UPS, 205 route de Narbonne, BP44099, F-31077 Toulouse cedex 4, France.

E-mail: antoine.simonneau@lcc-toulouse.fr

**Abstract:** A Lewis superacidic bis(borane) C<sub>6</sub>F<sub>4</sub>{B(C<sub>6</sub>F<sub>5</sub>)<sub>2</sub>}<sub>2</sub> was reacted with tungsten N<sub>2</sub>-complexes [W(N<sub>2</sub>)<sub>2</sub>(R<sub>2</sub>PCH<sub>2</sub>CH<sub>2</sub>PR<sub>2</sub>)<sub>2</sub>] (R = Ph or Et), affording zwitterionic boryldiazenido W(II) complexes *trans*-[W(L)(R<sub>2</sub>PCH<sub>2</sub>CH<sub>2</sub>PR<sub>2</sub>)<sub>2</sub>(N<sub>2</sub>{B(C<sub>6</sub>F<sub>5</sub>)<sub>2</sub>(C<sub>6</sub>F<sub>4</sub>B(C<sub>6</sub>F<sub>5</sub>)<sub>3</sub>)})] (L =  $\emptyset$ , N<sub>2</sub> or THF). Those compounds feature only one N-B linkage of covalent type, as a result of intramolecular boron-to-boron C<sub>6</sub>F<sub>5</sub> transfer. Complex *trans*-[W(THF)(Et<sub>2</sub>PCH<sub>2</sub>CH<sub>2</sub>PEt<sub>2</sub>)<sub>2</sub>(N<sub>2</sub>{B(C<sub>6</sub>F<sub>5</sub>)<sub>2</sub>C<sub>6</sub>F<sub>4</sub>B(C<sub>6</sub>F<sub>5</sub>)<sub>3</sub>)})] (**5**) was shown to split H<sub>2</sub>, leading to a seven-coordinate complex [W(H)<sub>2</sub>(Et<sub>2</sub>PCH<sub>2</sub>CH<sub>2</sub>PEt<sub>2</sub>)<sub>2</sub>(N<sub>2</sub>{B(C<sub>6</sub>F<sub>5</sub>)<sub>2</sub>C<sub>6</sub>F<sub>4</sub>)}] (**7**). Interestingly, hydride storage at the metal triggers backward C<sub>6</sub>F<sub>5</sub> transfer. This reverts the bis(boron) moiety to its bis(borane) state, now doubly binding the distal N, with structural parameters and DFT computations pointing to dative N→B bonding. By comparison with an N<sub>2</sub> complex [W(H)<sub>2</sub>(Et<sub>2</sub>PCH<sub>2</sub>CH<sub>2</sub>PEt<sub>2</sub>)<sub>2</sub>(N<sub>2</sub>{B(C<sub>6</sub>F<sub>5</sub>)<sub>3</sub>)}] (**10**) differing only by the Lewis acid (LA), namely B(C<sub>6</sub>F<sub>5</sub>)<sub>3</sub>, coordinated to the distal N, we demonstrate that two-fold LA coordination imparts strong N<sub>2</sub> activation up to the diazene-diide (N<sub>2</sub><sup>2-</sup>) state. To the best of our knowledge, this is the first example of a neutral LA coordination that induces reduction of N<sub>2</sub>.

# 1 Table of Contents

|          |                                                                                                            |           |
|----------|------------------------------------------------------------------------------------------------------------|-----------|
| <b>2</b> | <b>EXPERIMENTAL PROCEDURES</b>                                                                             | <b>4</b>  |
| 2.1      | GENERAL CONSIDERATIONS                                                                                     | 4         |
| 2.2      | PREPARATION AND CHARACTERIZATION OF NEW COMPOUNDS                                                          | 4         |
| 2.2.1    | Preparation of $[W(dppe)_2(\mu-N_2)B(C_6F_5)(C_6F_4\{B(C_6F_5)_3\})]$ ( <b>3</b> )                         | 4         |
| 2.2.2    | Preparation of $[W(N_2)(depe)_2(\mu-N_2)B(C_6F_5)(C_6F_4\{B(C_6F_5)_3\})]$ ( <b>4</b> )                    | 4         |
| 2.2.3    | Preparation of $[W(THF)(depe)_2(\mu-N_2)B(C_6F_5)(C_6F_4\{B(C_6F_5)_3\})]$ ( <b>5</b> )                    | 5         |
| 2.2.4    | Spectroscopic characterization of $[W(depe)_2(H)_2(\mu-N_2)B(C_6F_5)(C_6F_4\{B(C_6F_5)_3\})]$ ( <b>6</b> ) | 5         |
| 2.2.5    | Preparation of $[W(depe)_2(H)_2(\mu-N_2)(1,2-\{B(C_6F_5)_2\}_2C_6F_4)]$ ( <b>7</b> ) from <b>5</b>         | 6         |
| 2.2.6    | Preparation of $[W(depe)_2(H)_2(\mu-N_2)B(C_6F_5)_3]$ ( <b>10</b> )                                        | 6         |
| 2.2.7    | Preparation of $[W(depe)_2(H)_2(\mu-N_2)(1,2-\{B(C_6F_5)_2\}_2C_6F_4)]$ ( <b>7</b> ) from <b>10</b>        | 7         |
| <b>3</b> | <b>SPECTROSCOPIC DATA OF NEW COMPOUNDS</b>                                                                 | <b>8</b>  |
| 3.1      | $[W(DPPE)_2(M-N_2)B(C_6F_5)(C_6F_4\{B(C_6F_5)_3\})]$ ( <b>3</b> )                                          | 8         |
| 3.1.1    | <b>Figure S1.</b> FT-IR (ATR) of <b>3</b> .                                                                | 8         |
| 3.2      | $[W(N_2)(DEPE)_2(M-N_2)B(C_6F_5)(C_6F_4\{B(C_6F_5)_3\})]$ ( <b>4</b> )                                     | 9         |
| 3.2.1    | <b>Figure S2.</b> FT-IR (ATR) of <b>4</b> .                                                                | 9         |
| 3.2.2    | <b>Figure S3.</b> FT-IR (ATR) of $^{15}N$ - <b>4</b> .                                                     | 10        |
| 3.3      | $[W(THF)(DEPE)_2(M-N_2)B(C_6F_5)(C_6F_4\{B(C_6F_5)_3\})]$ ( <b>5</b> )                                     | 11        |
| 3.3.1    | <b>Figure S4.</b> $^1H$ NMR (400 MHz, THF- $d_8$ ) of <b>5</b> .                                           | 11        |
| 3.3.2    | <b>Figure S5.</b> $^{31}P\{^1H\}$ NMR (162 MHz, THF- $d_8$ ) of <b>5</b> .                                 | 12        |
| 3.3.3    | <b>Figure S6.</b> $^{11}B$ NMR (128 MHz, THF- $d_8$ ) of <b>5</b> .                                        | 13        |
| 3.3.4    | <b>Figure S7.</b> $^{15}N$ INVGATED $^1H$ NMR (41 MHz, $C_6D_6$ ) of <b>5</b> .                            | 14        |
| 3.3.5    | <b>Figure S8.</b> $^{19}F$ NMR (376 MHz, THF- $d_8$ ) of <b>5</b> .                                        | 15        |
| 3.3.6    | <b>Figure S9.</b> FT-IR (ATR) of <b>5</b> .                                                                | 16        |
| 3.3.7    | <b>Figure S10.</b> FT-IR (ATR) of $^{15}N$ - <b>5</b> .                                                    | 17        |
| 3.3.8    | <b>Figure S11.</b> Raman spectrum of <b>5</b> .                                                            | 18        |
| 3.3.9    | <b>Figure S12.</b> Raman spectrum of $^{15}N$ - <b>5</b> .                                                 | 19        |
| 3.4      | $[W(DEPE)_2(H)_2(M-N_2)B(C_6F_5)(C_6F_4\{B(C_6F_5)_3\})]$ ( <b>6</b> )                                     | 20        |
| 3.4.1    | <b>Figure S13.</b> $^1H$ NMR (400 MHz, THF- $d_8$ ) of <b>6</b> isomers.                                   | 20        |
| 3.4.2    | <b>Figure S14.</b> $^{31}P\{^1H\}$ NMR (162 MHz, THF- $d_8$ ) of <b>6</b> isomers.                         | 21        |
| 3.4.3    | <b>Figure S15.</b> $^{11}B$ NMR (128 MHz, THF- $d_8$ ) of <b>6</b> isomers.                                | 22        |
| 3.4.4    | <b>Figure S16.</b> $^{19}F$ NMR (376 MHz, THF- $d_8$ ) of <b>6</b> isomers.                                | 23        |
| 3.4.5    | <b>Figure S17.</b> $^{15}N$ INVGATED $^1H$ NMR (41 MHz, THF- $d_8$ ) of <b>6</b> isomers.                  | 24        |
| 3.5      | II. <b>6.</b> $[W(DEPE)_2(H)_2(M-N_2)(1,2-\{B(C_6F_5)_2\}_2C_6F_4)]$ ( <b>7</b> )                          | 25        |
| 3.5.1    | <b>Figure S18.</b> $^1H$ NMR (400 MHz, THF- $d_8$ ) of <b>7</b> .                                          | 25        |
| 3.5.2    | <b>Figure S19.</b> $^{31}P\{^1H\}$ NMR (162 MHz, THF- $d_8$ ) of <b>7</b> .                                | 26        |
| 3.5.3    | <b>Figure S20.</b> $^{11}B$ NMR (128 MHz, THF- $d_8$ ) of <b>7</b> .                                       | 27        |
| 3.5.4    | <b>Figure S21.</b> $^{19}F$ NMR (376 MHz, THF- $d_8$ ) of <b>7</b> .                                       | 28        |
| 3.5.5    | <b>Figure S22.</b> FT-IR (ATR) of <b>7</b> .                                                               | 29        |
| 3.5.6    | <b>Figure S23.</b> FT-IR (ATR) of $^{15}N$ - <b>7</b> .                                                    | 30        |
| 3.5.7    | <b>Figure S24.</b> Raman spectrum of <b>7</b> .                                                            | 31        |
| 3.5.8    | <b>Figure S25.</b> Raman spectrum of $^{15}N$ - <b>7</b> .                                                 | 32        |
| 3.6      | $[W(DEPE)_2(H)_2(M-N_2)B(C_6F_5)_3]$ ( <b>10</b> )                                                         | 33        |
| 3.6.1    | <b>Figure S26.</b> $^1H$ NMR (400 MHz, $C_6D_6$ ) of <b>10</b> .                                           | 33        |
| 3.6.2    | <b>Figure S27.</b> $^{11}B$ NMR (128 MHz, $C_6D_6$ ) of <b>10</b> .                                        | 34        |
| 3.6.3    | <b>Figure S28.</b> $^{19}F$ NMR (376 MHz, $C_6D_6$ ) of <b>10</b> .                                        | 35        |
| 3.6.4    | <b>Figure S29.</b> $^{15}N$ INVGATED $^1H$ NMR (41 MHz, $C_6D_6$ ) of <b>10</b> .                          | 36        |
| 3.6.5    | <b>Figure S30.</b> $^{31}P\{^1H\}$ NMR (162 MHz, $C_6D_6$ ) of <b>10</b> .                                 | 37        |
| 3.6.6    | <b>Figure S31.</b> FT-IR (ATR) of <b>10</b> .                                                              | 38        |
| 3.6.7    | <b>Figure S32.</b> FT-IR (ATR) of $^{15}N$ - <b>10</b> .                                                   | 39        |
| 3.6.8    | <b>Figure S33.</b> Raman spectra of <b>10</b> .                                                            | 40        |
| 3.6.9    | <b>Figure S34.</b> Raman spectra of $^{15}N$ - <b>10</b> .                                                 | 41        |
| <b>4</b> | <b>CRYSTALLOGRAPHIC DATA</b>                                                                               | <b>42</b> |
| 4.1      | DATA COLLECTION AND REFINEMENT                                                                             | 42        |

|          |                                                                                                                                   |           |
|----------|-----------------------------------------------------------------------------------------------------------------------------------|-----------|
| 4.2      | X-RAY DIFFRACTION ANALYSIS OF 3 .....                                                                                             | 43        |
| 4.3      | X-RAY DIFFRACTION ANALYSIS OF 4 .....                                                                                             | 44        |
| 4.4      | X-RAY DIFFRACTION ANALYSIS OF 5 .....                                                                                             | 45        |
| 4.5      | X-RAY DIFFRACTION ANALYSIS OF 7 .....                                                                                             | 46        |
| 4.6      | X-RAY DIFFRACTION ANALYSIS OF 10 .....                                                                                            | 47        |
| <b>5</b> | <b>DFT CALCULATIONS .....</b>                                                                                                     | <b>48</b> |
| 5.1      | METHODS .....                                                                                                                     | 48        |
| 5.1.1    | <i>Thermodynamics of H<sub>2</sub> oxidative addition and NMR chemical shifts .....</i>                                           | <i>48</i> |
| 5.1.2    | <i>IR frequencies calculations, Kohn-Sham orbitals and NBO analysis of 7 and 10 .....</i>                                         | <i>48</i> |
| 5.2      | THERMODYNAMICS OF H <sub>2</sub> OXIDATIVE ADDITION .....                                                                         | 48        |
| 5.3      | CHEMICAL SHIFT ESTIMATIONS .....                                                                                                  | 49        |
| 5.4      | COORDINATES OF OPTIMIZED GEOMETRIES USED FOR CHEMICAL SHIFT ESTIMATIONS (B3PW91, 6-31G) .....                                     | 50        |
| 5.4.1    | <i>Compound 8 (E = -4582.518956 Ha) .....</i>                                                                                     | <i>50</i> |
| 5.4.2    | <i>Compound 6 (E = -4582.521840 Ha) .....</i>                                                                                     | <i>51</i> |
| 5.4.3    | <i>Compound 6' (E = -4582.521326 Ha) .....</i>                                                                                    | <i>52</i> |
| 5.4.4    | <i>Compound 7 (E = -4582.545643 Ha) .....</i>                                                                                     | <i>53</i> |
| 5.4.5    | <i>Compound A (E = -1345.722637 Ha) .....</i>                                                                                     | <i>55</i> |
| 5.4.6    | <i>Compound B (E = -1466.741397 Ha) .....</i>                                                                                     | <i>56</i> |
| 5.4.7    | <i>Compound C (E = -1704.654681 Ha) .....</i>                                                                                     | <i>57</i> |
| 5.4.8    | <i>Compound D (E = -1252.420032 Ha) .....</i>                                                                                     | <i>58</i> |
| 5.4.9    | <i>Compound E (E = -1409.587756 Ha) .....</i>                                                                                     | <i>59</i> |
| 5.4.10   | <i>Compound F (E = -2219.506031 Ha) .....</i>                                                                                     | <i>60</i> |
| 5.5      | FRONTIER KOHN-SHAM ORBITALS OF 7 AND 10 .....                                                                                     | 61        |
| 5.6      | COORDINATES OF OPTIMIZED GEOMETRIES OF 7 AND 10 WITH DISPERSION (6-31G(D,P)-D3BJ) .....                                           | 63        |
| 5.6.1    | <i>Compound 7 .....</i>                                                                                                           | <i>63</i> |
| 5.6.2    | <i>Compound 10 .....</i>                                                                                                          | <i>64</i> |
| 5.7      | VISUALIZATION OF PERTINENT PRE-ORTHOGONAL NATURAL LOCALIZED MOLECULAR ORBITALS AND NATURAL BOND ORBITALS (PNLMOs AND PNBOS) ..... | 65        |
| <b>6</b> | <b>REFERENCES .....</b>                                                                                                           | <b>68</b> |

## 2 Experimental Procedures

### 2.1 General Considerations

All reactions were performed in flame- or oven-dried glassware with rigorous exclusion of air and moisture, using a nitrogen filled Jacomex glove box ( $O_2 < 0.5$  ppm,  $H_2O < 1$  ppm). Solvents used were pre-dried (*n*-pentane and tetrahydrofuran by passing through a Puresolv MD 7 solvent purification machine; benzene, fluorobenzene, hexamethyldisiloxane (HMDSO) and tetrahydropyran by distillation over  $CaH_2$ ), degassed by freeze-pump-thaw cycles, dried over molecular sieves and stored in the glove box.  $C_6D_6$ ,  $C_6D_5Cl$  and  $THF-d_8$  (purchased from Eurisotop) were degassed by freeze-pump-thaw cycles, dried over molecular sieves and stored in the glove box. The W-dinitrogen complexes **1<sup>R</sup>**, **9** and the isotopomer  $^{15}N$ -**1<sup>Et</sup>**,<sup>S1</sup> and 1,2-[ $B(C_6F_5)_2$ ]<sub>2</sub> $C_6F_4$  (**2**)<sup>S2</sup> were prepared according to reported procedures from unpurified commercially available chemicals and stored in the glove box.  $^1H$ ,  $^{11}B$ ,  $^{13}C$ ,  $^{19}F$  and  $^{31}P$  NMR spectra were recorded using NMR tubes equipped with J. Young valves on a Bruker Avance III 400 spectrometer. Chemical shifts are in parts per million (ppm) downfield from tetramethylsilane and are referenced to the most upfield residual solvent resonance as the internal standard in  $^1H$  NMR ( $C_6HD_5$ :  $\delta$  reported = 7.16 ppm,  $C_6HD_4Cl$ :  $\delta$  reported = 6.96 ppm,  $THF-d_8$ :  $\delta$  reported = 1.72 ppm).  $^{11}B$ ,  $^{15}N$ ,  $^{19}F$  and  $^{31}P$  NMR spectra were calibrated according to the IUPAC recommendation using a unified chemical shift scale based on the proton resonance of tetramethylsilane as primary reference.<sup>S3</sup> Data are reported as follows: chemical shift, multiplicity (br = broad, s = singlet, d = doublet, t = triplet, q = quartet, quint = quintet, hept = heptuplet, m = multiplet), coupling constant (Hz), and integration. Infrared (IR) spectra were recorded in the glove box ( $O_2 < 0.5$  ppm,  $H_2O < 1$  ppm) on an Agilent Cary 630 FT-IR spectrophotometer equipped with ATR or transmission modules and are reported in wavenumbers ( $cm^{-1}$ ) with (s) indicating strong absorption. Raman spectra were measured on XploRA Raman microspectrometer (Horiba). Excitation was achieved with a 785 nm laser line focused on the sample with a microscope objective (x100, numerical aperture = 0.5). Elemental analyses were performed on samples sealed in tin capsules under Ar or  $N_2$  by the Analytical Service of the Laboratoire de Chimie de Coordination; results are the average of two independent measurements.

### 2.2 Preparation and Characterization of New Compounds

#### 2.2.1 Preparation of $[W(dppe)_2(\mu-N_2)B(C_6F_5)(C_6F_4\{B(C_6F_5)_3\})]$ (**3**)

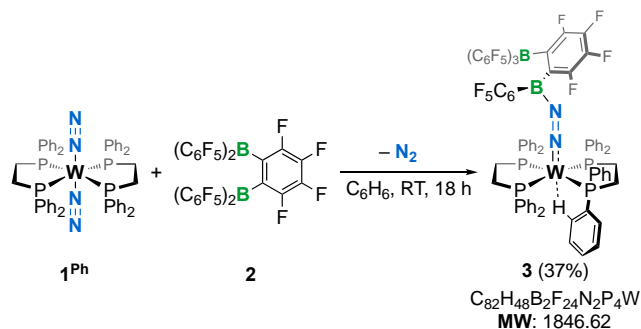

A solution of 1,2-[ $B(C_6F_5)_2$ ]<sub>2</sub> $C_6F_4$  (**2**, 25 mg, 30  $\mu$ mol) in  $C_6H_6$  (1 mL) was added to a deep orange solution of  $W(N_2)_2(dppe)_2$  (**1<sup>Ph</sup>**, 31 mg, 30  $\mu$ mol, 1 equiv.) in  $C_6H_6$  (3.5 mL) at room temperature, causing immediate gas ( $N_2$ ) evolution and color change of the solution to dark red. The mixture was left standing for two days while dark red crystals of **2** precipitated out of the solution, the crystals were then recovered by decantation, washed with pentane (3 x 1.5 mL) and dried under vacuum (21 mg, 11  $\mu$ mol, 37% yield). Crystals obtained in this manner were of sufficient quality for X-ray diffraction analyses (see section 4.2). The insolubility of **3** in non-polar deuterated solvents and its instability in polar ones precluded the collection of meaningful NMR data. IR (ATR)  $\nu/cm^{-1}$  = 3056, 1642, 1552, 1511, 1458 (s), 1437, 1390, 1375, 1309, 1293, 1273, 1254, 1187, 1087(s), 1045, 1027, 976(s), 962, 911, 866, 845, 813, 787, 771, 749, 740(s), 692(s), 661. **Elem. Anal.** no satisfying elemental analyses could be obtained for this compound, probably due to its extreme sensitivity.

#### 2.2.2 Preparation of $[W(N_2)(depe)_2(\mu-N_2)B(C_6F_5)(C_6F_4\{B(C_6F_5)_3\})]$ (**4**)

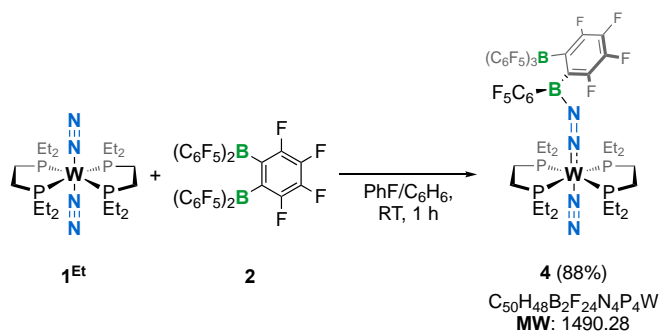

A solution of 1,2- $[(C_6F_5)_2]_2C_6F_4$  (**2**, 101 mg, 120  $\mu$ mol) in PhF (1 mL) was added to a deep red solution of  $W(N_2)_2(depe)_2$  (**1<sup>Et</sup>**, 78 mg, 120  $\mu$ mol) in PhF (1 mL) at room temperature to observe immediately a darkening of the solution.  $C_6H_6$  (1 mL) was then added and the mixture was left standing 18 h while dark brown crystals of **4**•PhF precipitated out of the solution. The crystals were then recovered by decantation, washed with pentane (3 x 1.5 mL) and dried under vacuum (163 mg, 105  $\mu$ mol, 88%). Crystals obtained in this manner were of sufficient quality for X-ray diffraction analyses (see section 4.3). The insolubility of **4** in apolar deuterated solvents and its instability in polar ones precluded the collection of meaningful NMR data. **<sup>15</sup>N-4** was obtained similarly from **<sup>15</sup>N-1<sup>Et</sup>**. IR (ATR)  $\nu/cm^{-1}$  = 2978, 2944, 2913, 2885, 2220, 1641, 1628, 1595, 1513, 1495, 1454(s), 1387, 1375, 1310, 1294, 1271, 1254, 1219, 1189, 1156, 1111, 1083(s), 1039, 1029, 973(s), 897, 869, 842, 806, 771, 749(s), 739, 729, 683(s), 662; **<sup>15</sup>N-4**  $\nu/cm^{-1}$  = 2974, 2942, 2914, 2882, 2220, 1667, 1641, 1595, 1513, 1493, 1454, 1375, 1307, 1293, 1271, 1218, 1109, 1083, 1039, 973, 867, 841, 806, 755, 687. Elem. Anal. calcd. for  $C_{50}H_{48}B_2F_{24}N_2P_4W \cdot 1.5C_6H_5F$  (%): C, 43.36; H, 3.42; N, 3.43. Found: C, 43.19; H, 3.29; N, 2.00.

### 2.2.3 Preparation of $[W(THF)(depe)_2(\mu-N_2)B(C_6F_5)(C_6F_4\{B(C_6F_5)_3\})]$ (**5**)

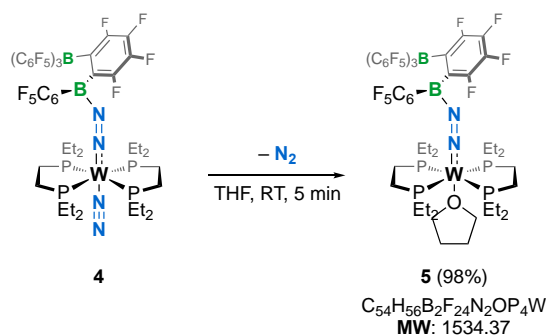

Solubilisation of **3**•PhF (37 mg, 23  $\mu$ mol) in THF (1 mL) led to immediate gas ( $N_2$ ) evolution. After 5 min at RT the solvent was removed under vacuum and the resulting oily residue triturated with pentane to yield **5** as a dark yellow powder recovered by decantation and dried under vacuum (35 mg, 23  $\mu$ mol, 98%). Crystals suitable for analysis of **5** by X-ray diffraction were grown from a THF solution layered with HMDSO, but despite several attempts, the obtained structures were of too low resolution (see section 4.4). **<sup>15</sup>N-5** was obtained similarly from **<sup>15</sup>N-4**. **<sup>1</sup>H NMR** (400 MHz, THF- $d_6$ ):  $\delta$  2.34–2.19 (m, 2H,  $PCH_2CH_3$ ), 2.16–1.95 (m, 8H,  $PCH_2CH_3$ ;  $PCH_2CH_2P$ ), 1.91–1.65 (m, 10H,  $PCH_2CH_3$ ;  $PCH_2CH_2P$ ), 1.64–1.46 (m, 4H,  $PCH_2CH_2P$ ), 1.38–1.10 (m, 21H,  $PCH_2CH_3$ ), 0.88–0.75 (m, 3H,  $PCH_2CH_3$ ) ppm. **<sup>11</sup>B NMR** (128 MHz, THF- $d_6$ ):  $\delta$  –15.05 (s, 1B,  $-B(C_6F_5)_3$ ) ppm. **<sup>15</sup>N-NMR** (41 MHz,  $C_6D_6$ ):  $\delta$  –55.7, –80.7. **<sup>19</sup>F NMR** (376 MHz, THF- $d_6$ ):  $\delta$  –122.40 (dd,  $J$  = 27.5, 14.7 Hz, 1F,  $o-C_6F_5-B(C_6F_5)_3$ ), –124.39 (dd,  $J$  = 23.1, 18.2 Hz, 1F,  $o-C_6F_5-B(C_6F_5)_3$ ), –126.44 (dd,  $J$  = 27.2, 18.5 Hz, 1F,  $-(C_6F_4B_2)$ ), –130.76 (dd,  $J$  = 27.0, 7.8 Hz, 1F,  $o-C_6F_5-B(C_6F_5)N$ ), –131.33 (ddd,  $J$  = 27.4, 16.5, 10.4 Hz, 1F,  $-(C_6F_4B_2)$ ), –132.02 (d,  $J$  = 24.8 Hz, 1F,  $o-C_6F_5-B(C_6F_5)_3$ ), –132.31 – –132.71 (m, 1F,  $o-C_6F_5-B(C_6F_5)_3$ ), –133.36 (td,  $J$  = 25.3, 7.0 Hz, 1F,  $o-C_6F_5-B(C_6F_5)_3$ ), –133.87 – –134.22 (m, 2F,  $o-C_6F_5-B(C_6F_5)_3$ ;  $-B(C_6F_5)N$ ), –158.92 (t,  $J$  = 20.3 Hz, 1F,  $p-C_6F_5-B(C_6F_5)N$ ), –164.39 (t,  $J$  = 20.1 Hz, 1F,  $p-C_6F_5-B(C_6F_5)_3$ ), –164.65 (t,  $J$  = 21.0 Hz, 1F,  $-(C_6F_4B_2)$ ), –164.93 (td,  $J$  = 22.8, 8.8 Hz, 1F,  $m-C_6F_5-B(C_6F_5)N$ ), –165.42 (ddd,  $J$  = 29.9, 20.5, 9.3 Hz, 1F,  $m-C_6F_5-B(C_6F_5)_3$ ), –166.12 (t,  $J$  = 20.4 Hz, 1F,  $p-C_6F_5-B(C_6F_5)_3$ ), –166.36 (t,  $J$  = 20.2 Hz, 1F,  $p-C_6F_5-B(C_6F_5)_3$ ), –167.17 (td,  $J$  = 21.8, 8.7 Hz, 1F,  $m-C_6F_5-B(C_6F_5)_3$ ), –167.69 (dd,  $J$  = 27.0, 19.7 Hz, 1F,  $-(C_6F_4B_2)$ ), –168.12 (td,  $J$  = 22.3, 5.8 Hz, 1F,  $m-C_6F_5-B(C_6F_5)_3$ ), –168.89 – –169.11 (m, 1F,  $m-C_6F_5-B(C_6F_5)_3$ ), –169.09 – –169.30 (m, 1F,  $m-C_6F_5-B(C_6F_5)_3$ ), –169.74 – –169.97 (m, 1F,  $m-C_6F_5-B(C_6F_5)_3$ ), –169.95 – –170.15 (m, 1F,  $m-C_6F_5-B(C_6F_5)_3$ ) ppm. **<sup>31</sup>P{<sup>1</sup>H} NMR** (162 MHz, THF- $d_6$ ):  $\delta$  38.6 (s, 2P,  $J_{WP}$  = 284.2 Hz), 33.8 (s, 2P,  $J_{WP}$  = 283.2 Hz). IR (ATR)  $\nu/cm^{-1}$  = 2963, 2941, 2883, 1641, 1512, 1455, 1377, 1297, 1271, 1253, 1109, 1079, 1039, 973, 867, 841, 810, 771, 758, 739, 730, 685, 662; **<sup>15</sup>N-5**  $\nu/cm^{-1}$  = 2964, 2922, 2884, 1642, 1512, 1455, 1377, 1298, 1271, 1183, 1107, 1081, 1038, 973, 867, 825, 810, 771, 755, 749, 729, 686, 665. Raman  $cm^{-1}$  = 1648, 1486, 1461, 1419, 1364, 1318, 1239, 1218, 1201, 1136, 1047, 984, 950, 916, 850, 816, 775, 733, 678; **<sup>15</sup>N-5**  $cm^{-1}$  = 1647, 1468, 1419, 1343, 1319, 1299, 1242, 1202, 1133, 1048, 996, 955, 915, 848, 819, 774, 732, 672. Elem. Anal. calcd. for  $C_{54}H_{56}B_2F_{24}N_2OP_4W$  (%): C, 42.27; H, 3.68; N, 1.83. Found: C, 41.98; H, 3.69; N, 1.97.

### 2.2.4 Spectroscopic characterization of $[W(depe)_2(H_2)(\mu-N_2)B(C_6F_5)(C_6F_4\{B(C_6F_5)_3\})]$ (**6**)

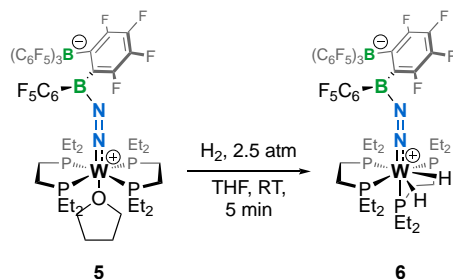

Complex **5** (12.2 mg, 8.0  $\mu$ mol) was solubilized in THF- $d_6$  (0.5 mL) and transferred in a high pressure Young NMR tube. After 5 min at RT,  $H_2$  was added (2.5 atm) and the mixture rapidly turned yellow from dark brown upon conversion to a mixture of two isomers of  $H_2$  complex **6**. **<sup>1</sup>H NMR** (400 MHz, THF- $d_6$ ): Owing to signal superposition, the two isomers could not be differentiated;  $\delta$  2.43 – 1.7 (m,  $PCH_2CH_3$ ,  $PCH_2CH_2P$ ), 1.70 – 1.42 (m,  $PCH_2CH_3$ ,  $PCH_2CH_3$ ), 1.34 – 1.03 (m,  $PCH_2CH_3$ ), 1.03 – 0.91 (m,  $PCH_2CH_3$ ), 0.90 – 0.78 (m,  $PCH_2CH_3$ ); hydride signals are hidden under the phosphine's substituents (see section 5.4.2 and 5.4.3). **<sup>11</sup>B NMR** (128 MHz, THF- $d_6$ ):

Both isomers =  $\delta$  -15.09 (s, 1B,  $-B(C_6F_5)_3$ ) ppm.  $^{15}N$ -NMR (41 MHz,  $C_6D_6$ ): Min =  $\delta$  - 60.5, - 97.3; Maj =  $\delta$  - 63.1, - 100.4.  $^{19}F$  NMR (376 MHz, THF- $d_8$ ): Maj =  $\delta$  -123.21 (br, 1F), -123.92 - -124.30 (m, 1F), -126.77 (br, 1F), -132.24 - -132.90 (m, 3F), -133.27 (dt,  $J$  = 24.2, 11.9 Hz, 1F), -133.43 - -133.65 (m, 1F), -134.24 - -134.46 (m, 1F), -134.51 - -134.78 (m, 1F), -156.62 (t,  $J$  = 19.7 Hz, 1F), -163.54 - -163.81 (m, 2F), -164.04 - -164.42 (m, 1F), -165.74 - -166.00 (m, 2F), -166.34 - -166.53 (m, 1F), -166.75 - -166.97 (m, 1F), -167.08 - -167.28 (m, 1F), -167.47 (td,  $J$  = 22.4, 21.8, 9.5 Hz, 1F), -168.45 (q,  $J$  = 25.8, 23.9 Hz, 2F), -168.89 (t,  $J$  = 22.0 Hz, 1F), -169.73 - -169.93 (m, 1F); Min =  $\delta$  -123.89 - -124.44 (m, 1F), -125.76 (br, 1F), -128.37 (br, 1F), -131.87 (d,  $J$  = 23.7 Hz, 1F), -132.26 - -132.89 (m, 3F), -133.43 - -133.65 (m, 1F), -133.77 (dd,  $J$  = 26.1, 7.9 Hz, 1F), -135.25 - -135.67 (m, 1F), -156.67 (t,  $J$  = 20.1 Hz, 1F), -162.81 (t,  $J$  = 21.2 Hz, 1F), -163.54 - -163.76 (m, 1F), -164.06 - -164.41 (m, 1F), -165.51 - -165.73 (m, 2F), -165.75 - -166.02 (m, 1F), -166.06 - -166.58 (m, 1F), -166.77 - -166.99 (m, 1F), -167.92 - -168.21 (m, 1F), -169.17 (t,  $J$  = 21.6 Hz, 1F), -169.31 - -169.54 (m, 1F), -169.56 - -169.74 (m, 1F), -170.44 - -170.71 (m, 1F).  $^{31}P\{^1H\}$  NMR (162 MHz, THF- $d_8$ ): Maj =  $\delta$  49.02 - 47.97 (m, 2P), 46.53 - 45.80 (m, 1P), 7.24 (t,  $J$  = 22.2 Hz, 1P) ppm; Min =  $\delta$  50.93 (t,  $J$  = 20.7 Hz, 1P), 48.06 - 47.68 (m, 1P), 45.91 - 45.35 (m, 1P), 8.73 (t,  $J$  = 22.5 Hz, 1P) ppm.

### 2.2.5 Preparation of $[W(depe)_2(H)_2(\mu-N_2)(1,2-(B(C_6F_5)_2)_2C_6F_4)]$ (**7**) from **5**

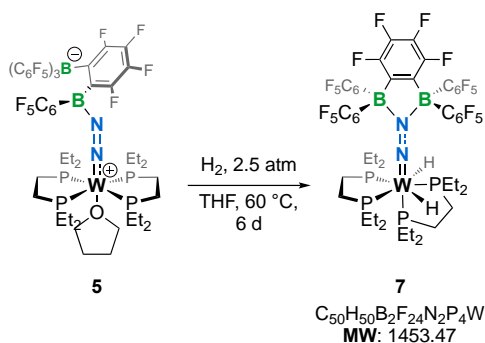

Complex **5** (46 mg, 30  $\mu$ mol) was solubilized in THF- $d_8$  (0.65 mL) and transferred in a high pressure Young NMR tube. After 5 min at RT,  $H_2$  was added (2.5 atm) and the mixture rapidly turned yellow from dark brown upon conversion to complex **6**. After 6 days at 60  $^\circ C$ , NMR monitoring shows that **7** is the major component of the reaction mixture. Slow diffusion of HMDSO in the THF solution allowed for the deposition of **7** as bright yellow crystals (21 mg, 48%) that were suitable for an XRD analysis (see section 4.8).  $^{15}N$ -**7** was obtained by another approach, see 2.2.7.

$^1H$  NMR (400 MHz, THF- $d_8$ ):  $\delta$  2.41 - 2.25 (m, 4H,  $PCH_2CH_3$ ), 2.20 - 2.06 (m, 4H,  $PCH_2CH_3$ ), 2.03 - 1.80 (m, 8H,  $PCH_2CH_2P$ ), 1.68 - 1.54 (m, 7H,  $PCH_2CH_3$ ,  $PCH_2CH_3$ ), 1.38 - 1.14 (m, 15H,  $PCH_2CH_3$ ), 1.05 (t,  $J$  = 7.5 Hz, 3H,  $PCH_2CH_3$ ), 1.01 (t,  $J$  = 7.5 Hz, 3H,  $PCH_2CH_3$ ); hydride signals are hidden under the phosphine's substituents (see section 5.4.4).  $^{11}B$  NMR (128 MHz, THF- $d_8$ ):  $\delta$  -3.36 (br, 2B) ppm.  $^{19}F$  NMR (376 MHz, THF- $d_8$ ): -116.38 (s br, 1F,  $o$ - $C_6F_5$ ), -119.07 (s br, 1F,  $o$ - $C_6F_5$ ), -126.64 (s br, 1F,  $o$ - $C_6F_5$ ), -128.17 (s br, 1F,  $o$ - $C_6F_5$ ), -129.03 (s br, 2F,  $o$ - $C_6F_5$ ), -129.73 (s br, 1F,  $o$ - $C_6F_5$ ), -130.78 (s br, 1F,  $o$ - $C_6F_5$ ), -138.33 (d br,  $J$  = 36.3 Hz, 1F,  $o$ - $C_6F_5$ ), -139.60 (s br, 1F,  $o$ - $C_6F_5$ ), -162.36 (s br, 1F,  $p$ - $C_6F_5$ ), -163.52 (s br, 1F,  $p$ - $C_6F_5$ ), -163.89 (s br, 1F,  $p$ - $C_6F_5$ ), -164.08 (s br, 1F,  $p$ - $C_6F_5$ ), -165.96 (s br, 1F,  $m$ - $C_6F_5$ ), -166.14 (s br, 1F,  $m$ - $C_6F_5$ ), -166.58 (s br, 1F,  $m$ - $C_6F_5$ ), -166.75 (s br, 1F,  $m$ - $C_6F_5$ ), -166.97 (s br, 2F,  $m$ - $C_6F_5$ ), -167.40 (s br, 2F,  $m$ - $C_6F_5$ ), -167.75 (s br, 1F,  $m$ - $C_6F_5$ ), -168.82 (s br, 1F,  $m$ - $C_6F_5$ ) ppm.  $^{31}P\{^1H\}$  NMR (162 MHz, THF- $d_8$ ):  $\delta$  44.24 (t,  $J$  = 13.7 Hz,  $J_{PW}$  = 76.5 Hz, 1P), 37.85 (br, 1P), 35.51 (br, 1P), -3.89 (t,  $J$  = 20.8 Hz, 1P). IR (ATR)  $\nu/cm^{-1}$  = 2978, 2943, 2885, 1850, 1640, 1513, 1446, 1399, 1360, 1327, 1274, 1252, 1082, 1031, 971, 959, 860, 823, 795, 751, 734, 677. Elem. Anal. calcd. for  $C_{50}H_{50}B_2F_{24}N_2P_4W$  (%): C, 41.01; H, 3.44; N, 1.91. Found: C, 41.35; H, 3.54; N, 1.96.

### 2.2.6 Preparation of $[W(depe)_2(H)_2(\mu-N_2)B(C_6F_5)_3]$ (**10**)

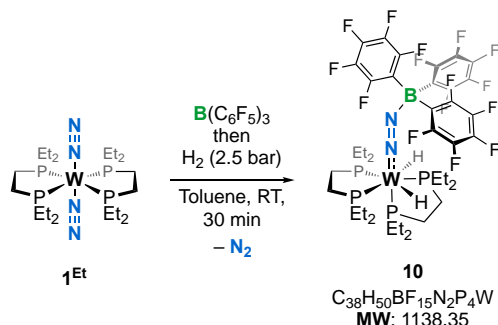

Toluene (2 mL) was added at room temperature to a vial containing **1Et** (150 mg, 230  $\mu$ mol) and  $B(C_6F_5)_3$  (118 mg, 230  $\mu$ mol, 1 equiv.). The reaction mixture was transferred to a Fisher-Porter vessel and placed under an  $H_2$  atmosphere (2.5 bar). The dark maroon-purple solution was stirred for 30 min, time during which the mixture turned to a deep orange solution. This was concentrated under vacuum to 1 mL and layered with pentane. After 3 days at -30  $^\circ C$ , dark red-orange crystals of **10** precipitated. They were recovered by filtration, washed with pentane and dried under vacuum (212 mg, 81% yield, toluene solvate).  $^{15}N$ -**10** was obtained similarly from  $^{15}N$ -**1Et**.

$^1H$  NMR (400 MHz,  $C_6D_6$ ):  $\delta$  1.88 - 1.73 (m, 2H), 1.73 - 1.53 (m, 4H), 1.53 - 1.32 (m, 5H), 1.32 - 1.08 (m, 6H), 1.08 - 0.86 (m, 16H), 0.86 - 0.76 (m, 3H), 0.76 - 0.57 (m, 6H), 0.40 (dt,  $J$  = 14.3, 7.5 Hz, 6H), -1.38 - -2.04 (m, 2H) ppm.  $^{11}B$  NMR (128 MHz,  $C_6D_6$ ):  $\delta$  - 9.7

ppm.  $^{15}\text{N-NMR}$  (41 MHz,  $\text{C}_6\text{D}_6$ ):  $\delta$  - 35.5, - 130.3.  $^{19}\text{F NMR}$  (376 MHz,  $\text{C}_6\text{D}_6$ ):  $\delta$  - 131.3 (dd,  $J$  = 25.7, 7.9 Hz,  $2F_{\text{ortho}}$ ), - 160.3 (t,  $J$  = 20.7 Hz,  $1F_{\text{para}}$ ), - 165.2 (m,  $2F_{\text{meta}}$ ) ppm.  $^{31}\text{P}\{^1\text{H}\}$  NMR (162 MHz,  $\text{C}_6\text{D}_6$ ):  $\delta$  49.9 (br s, 1P,  $^1J_{\text{P-W}}$  = 182.7 Hz), 49.8 (br s, 2P,  $^1J_{\text{P-W}}$  = 180.7 Hz), 15.7 (m, 1P) ppm. IR (ATR)  $\nu/\text{cm}^{-1}$  = 2967, 2940, 1712(s), 1641, 1513(s), 1452(s), 1375, 1274, 1082(s), 1038, 973(s), 884, 872, 806, 755, 730, 703, 676, 660;  $^{15}\text{N-10}$   $\nu/\text{cm}^{-1}$  = 2967, 2939, 2906, 2879, 1778, 1659(s), 1640(s), 1513(s), 1452(s), 1425, 1374, 1273, 1245, 1125, 1098, 1083(s), 1037, 1026, 973(s), 882, 871, 817, 803, 768, 756, 730, 704, 675, 665. Raman  $\text{cm}^{-1}$  = 1827, 1714, 1641, 1513, 1464, 1418, 1374, 1322, 1277, 1236, 1191, 1132, 1083, 1041, 1002, 981, 956, 884, 833, 816, 806, 761, 740, 707, 675, 667;  $^{15}\text{N-10}$   $\text{cm}^{-1}$  = 1826, 1664, 1640, 1514, 1463, 1416, 1374, 1347, 1276, 1258, 1235, 1131, 1082, 1041, 1004, 980, 900, 881, 837, 817, 804, 760, 739, 707, 676, 666. Elem. Anal. calcd. for  $\text{C}_{38}\text{H}_{50}\text{BF}_{15}\text{N}_2\text{P}_4\text{W}\cdot 0.4\text{C}_7\text{H}_8$  (%): C, 41.46; H, 4.58; N, 2.39. Found: C, 41.41; H, 4.68; N, 2.33.

## 2.2.7 Preparation of $[\text{W}(\text{depe})_2(\text{H})_2(\mu\text{-N}_2)(1,2\text{-}\{\text{B}(\text{C}_6\text{F}_5)_2\}_2\text{C}_6\text{F}_4)]$ (**7**) from **10**

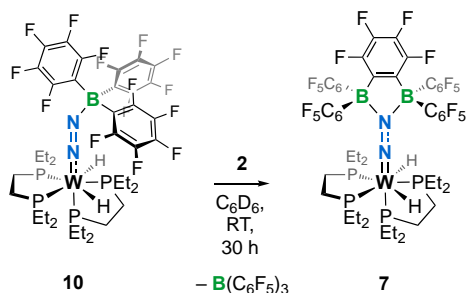

$\text{C}_6\text{D}_6$  (0.6 mL) was added to a J. Young-valved NMR tube containing  $[\text{W}(\text{depe})_2(\text{H})_2(\mu\text{-N}_2)\text{B}(\text{C}_6\text{F}_5)_3]$  (**10**, 23 mg, 20  $\mu\text{mol}$ ) and 1,2- $[\text{B}(\text{C}_6\text{F}_5)_2]_2\text{C}_6\text{F}_4$  (**2**, 17 mg, 20  $\mu\text{mol}$ , 1 equiv). The precipitation of a dense orange oil was observed and NMR analysis revealed the total consumption of **10** after 30 hours at room temperature. The light-yellow supernatant was separated by filtration, the oil washed with  $\text{C}_6\text{D}_6$  (3 x 0.1 mL) and dissolved in  $\text{C}_6\text{D}_4\text{Cl}_2$  (0.5 mL). The orange solution was then heated at 50  $^\circ\text{C}$  for 2 days, leading to the deposition of  $[\text{W}(\text{depe})_2(\text{H})_2(\mu\text{-N}_2)(1,2\text{-}\{\text{B}(\text{C}_6\text{F}_5)_2\}_2\text{C}_6\text{F}_4)]$  as bright yellow crystals (18 mg, 63% yield).  $^{15}\text{N-7}$  was obtained similarly from  $^{15}\text{N-10}$ . Despite several hours of acquisition, no nitrogen resonances could be detected in the  $^{15}\text{N}$  NMR spectra. IR (ATR)  $^{15}\text{N-7}$   $\nu/\text{cm}^{-1}$  = 2965, 2940, 2883, 1849, 1640, 1513, 1484, 1446, 1383, 1338, 1323, 1274, 1252, 1083, 1038, 971, 960, 859, 789, 750, 734, 712, 693, 678. Raman  $\text{cm}^{-1}$  = 1899, 1855, 1645, 1466, 1417, 1387, 1328, 1276, 1258, 1244, 1153, 1086, 1068, 1041, 984, 887, 863, 826, 794, 775, 733, 693, 675;  $^{15}\text{N-7}$   $\text{cm}^{-1}$  = 1899, 1854, 1645, 1466, 1417, 1388, 1326, 1275, 1258, 1241, 1154, 1087, 1068, 1040, 991, 888, 863, 827, 794, 775, 733, 693, 674.

### 3 Spectroscopic Data of New Compounds

#### 3.1 $[\text{W}(\text{dppe})_2(\mu\text{-N}_2)\text{B}(\text{C}_6\text{F}_5)(\text{C}_6\text{F}_4\{\text{B}(\text{C}_6\text{F}_5)_3\})] (\mathbf{3})$

##### 3.1.1 *Figure S1. FT-IR (ATR) of 3.*

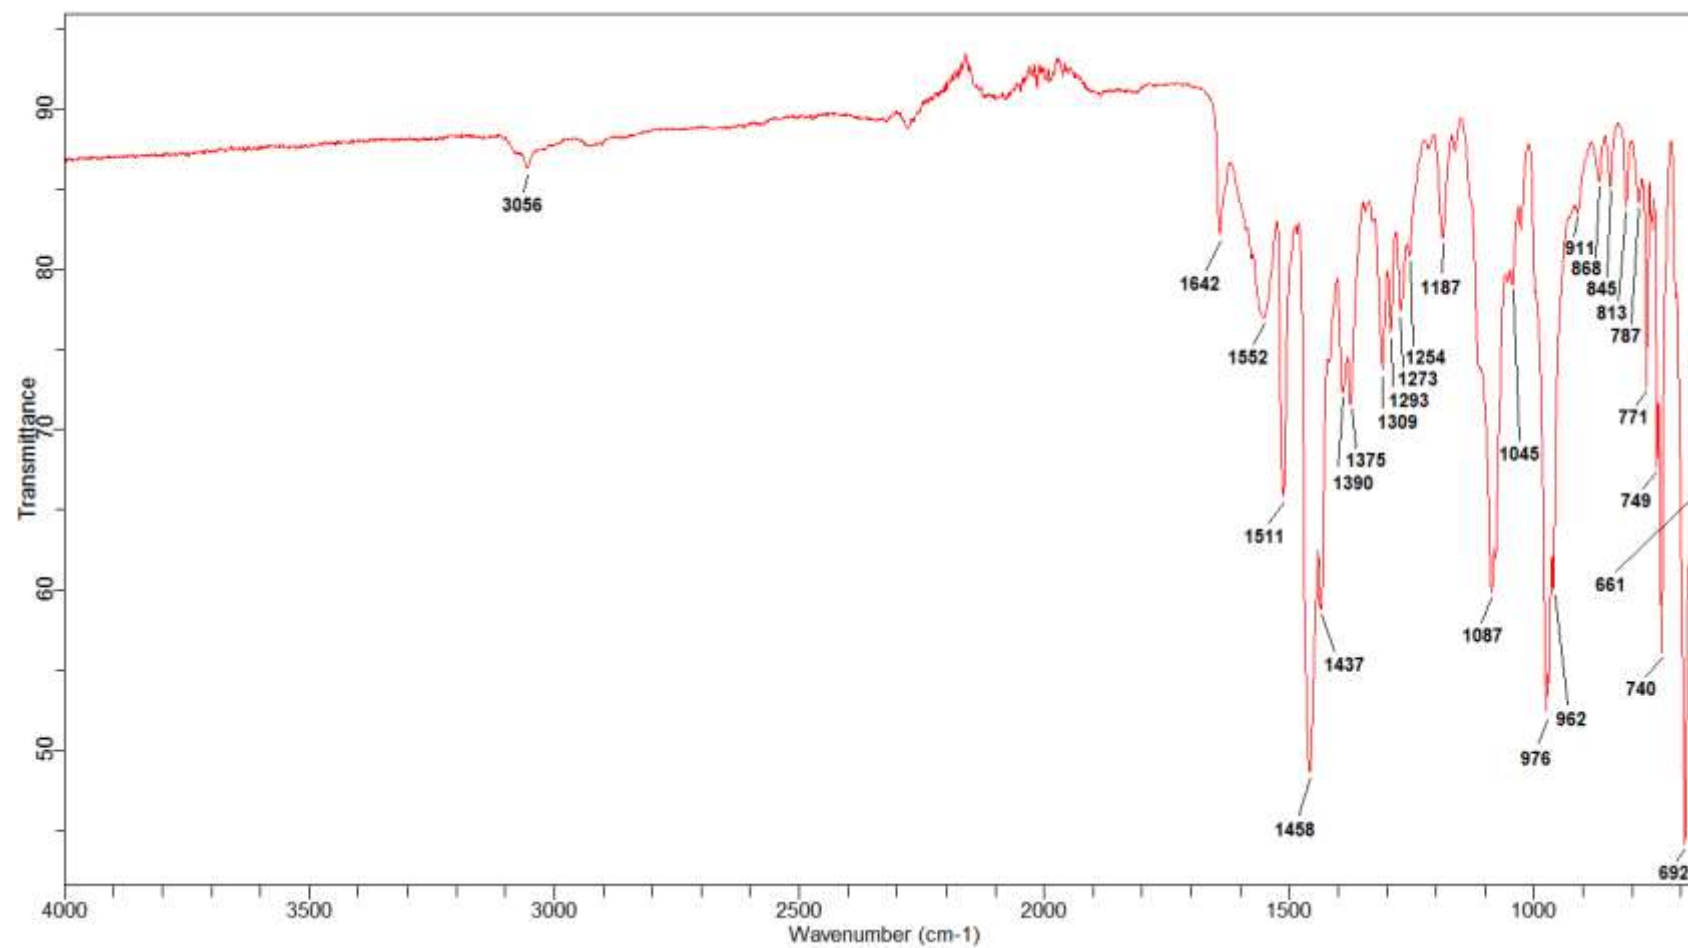



3.2  $[\text{W}(\text{N}_2)(\text{depe})_2(\mu\text{-N}_2)\text{B}(\text{C}_6\text{F}_5)(\text{C}_6\text{F}_4\{\text{B}(\text{C}_6\text{F}_5)_3\})]$  (4)

3.2.1 **Figure S2.** FT-IR (ATR) of 4.

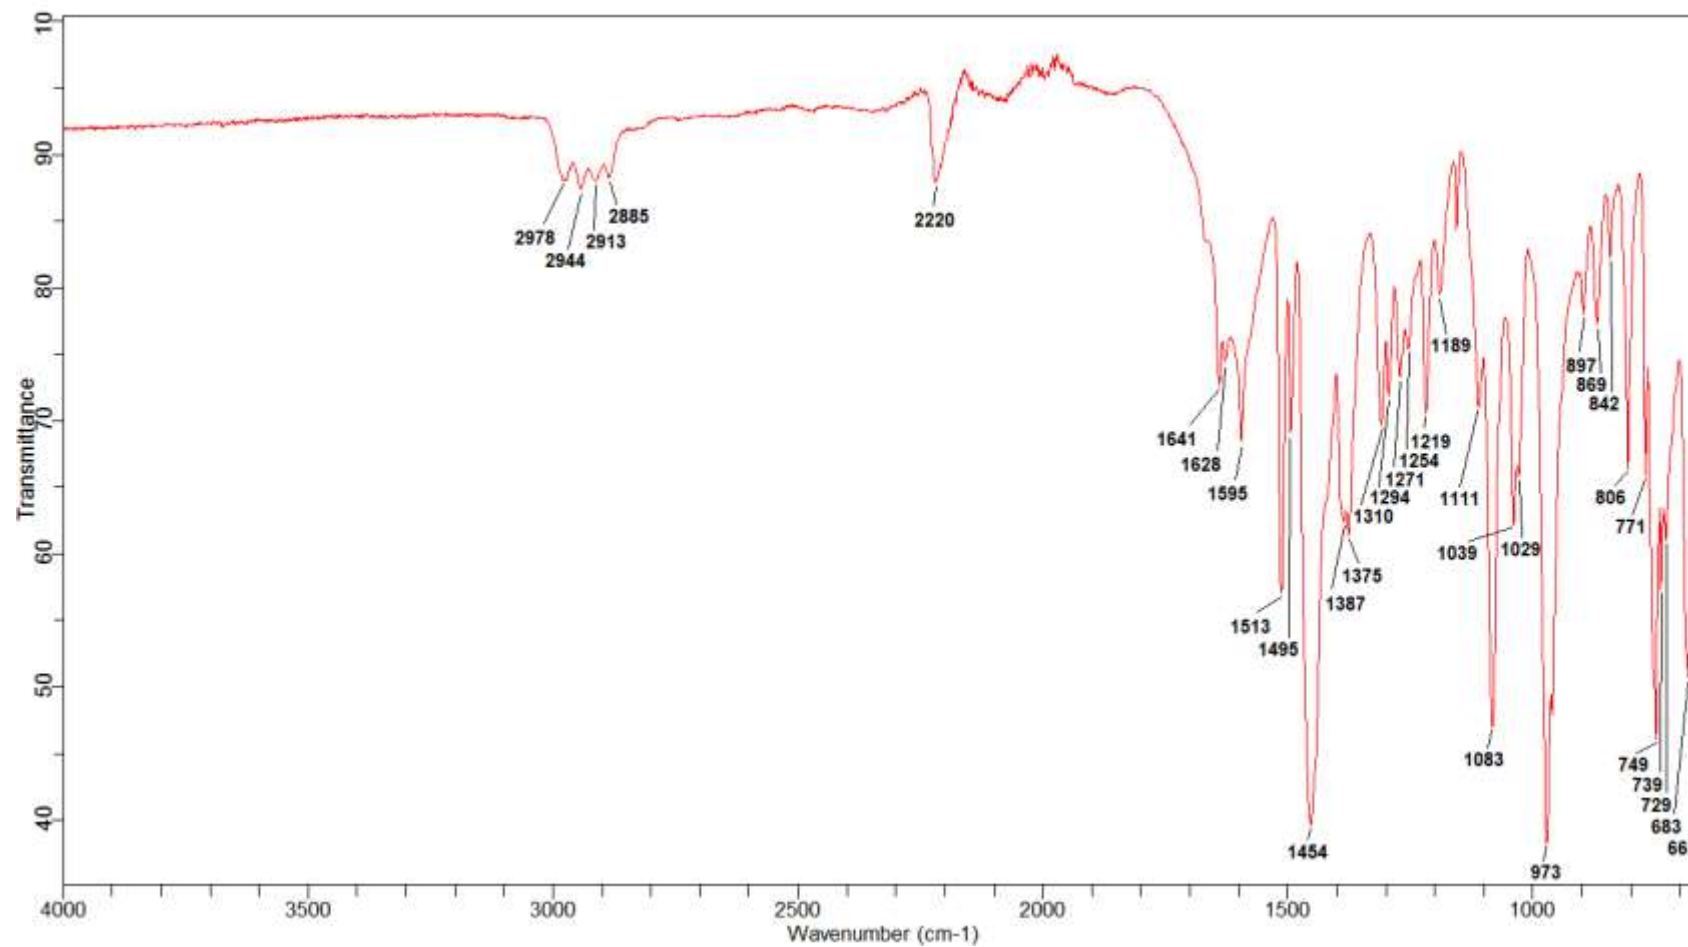

3.2.2 **Figure S3.** FT-IR (ATR) of  $^{15}\text{N-4}$ .

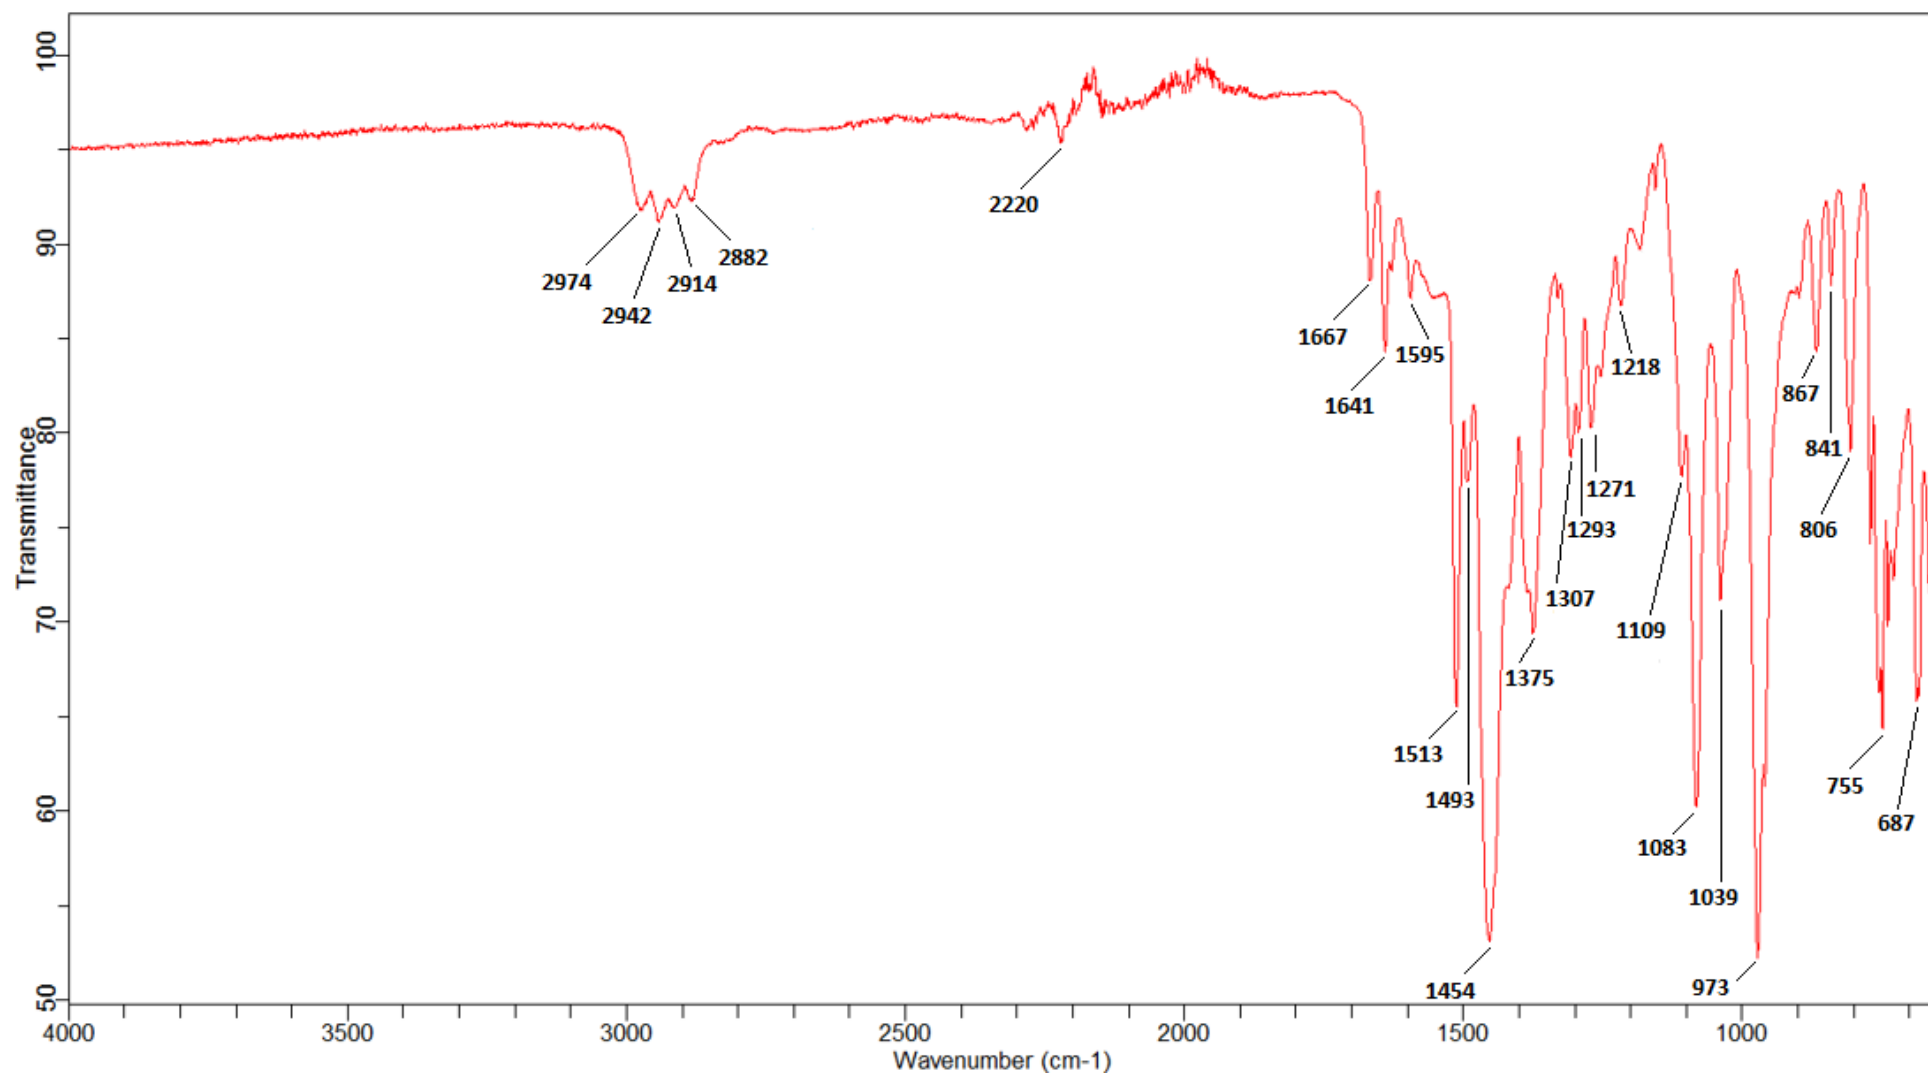

### 3.3 [W(THF)(depe)<sub>2</sub>(μ-N<sub>2</sub>)B(C<sub>6</sub>F<sub>5</sub>)(C<sub>6</sub>F<sub>4</sub>{B(C<sub>6</sub>F<sub>5</sub>)<sub>3</sub>})] (5)

#### 3.3.1 Figure S4. <sup>1</sup>H NMR (400 MHz, THF-d<sub>8</sub>) of 5.

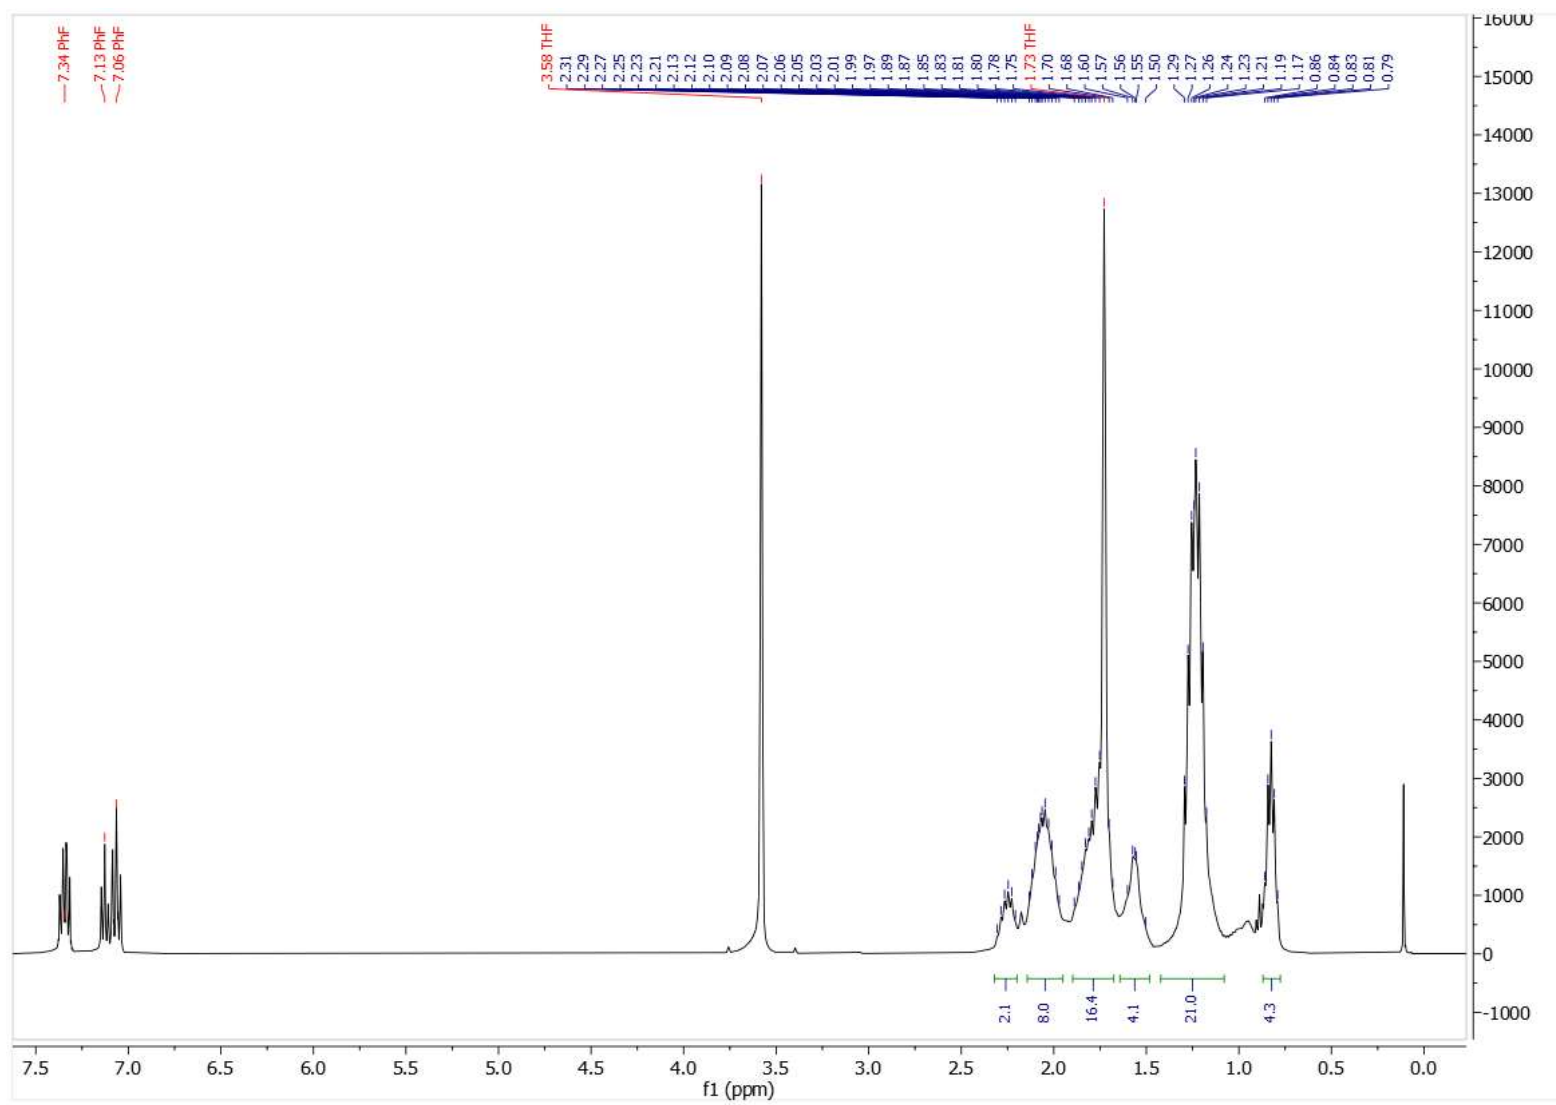

3.3.2 **Figure S5.**  $^{31}\text{P}\{^1\text{H}\}$  NMR (162 MHz, THF- $d_6$ ) of **5**.

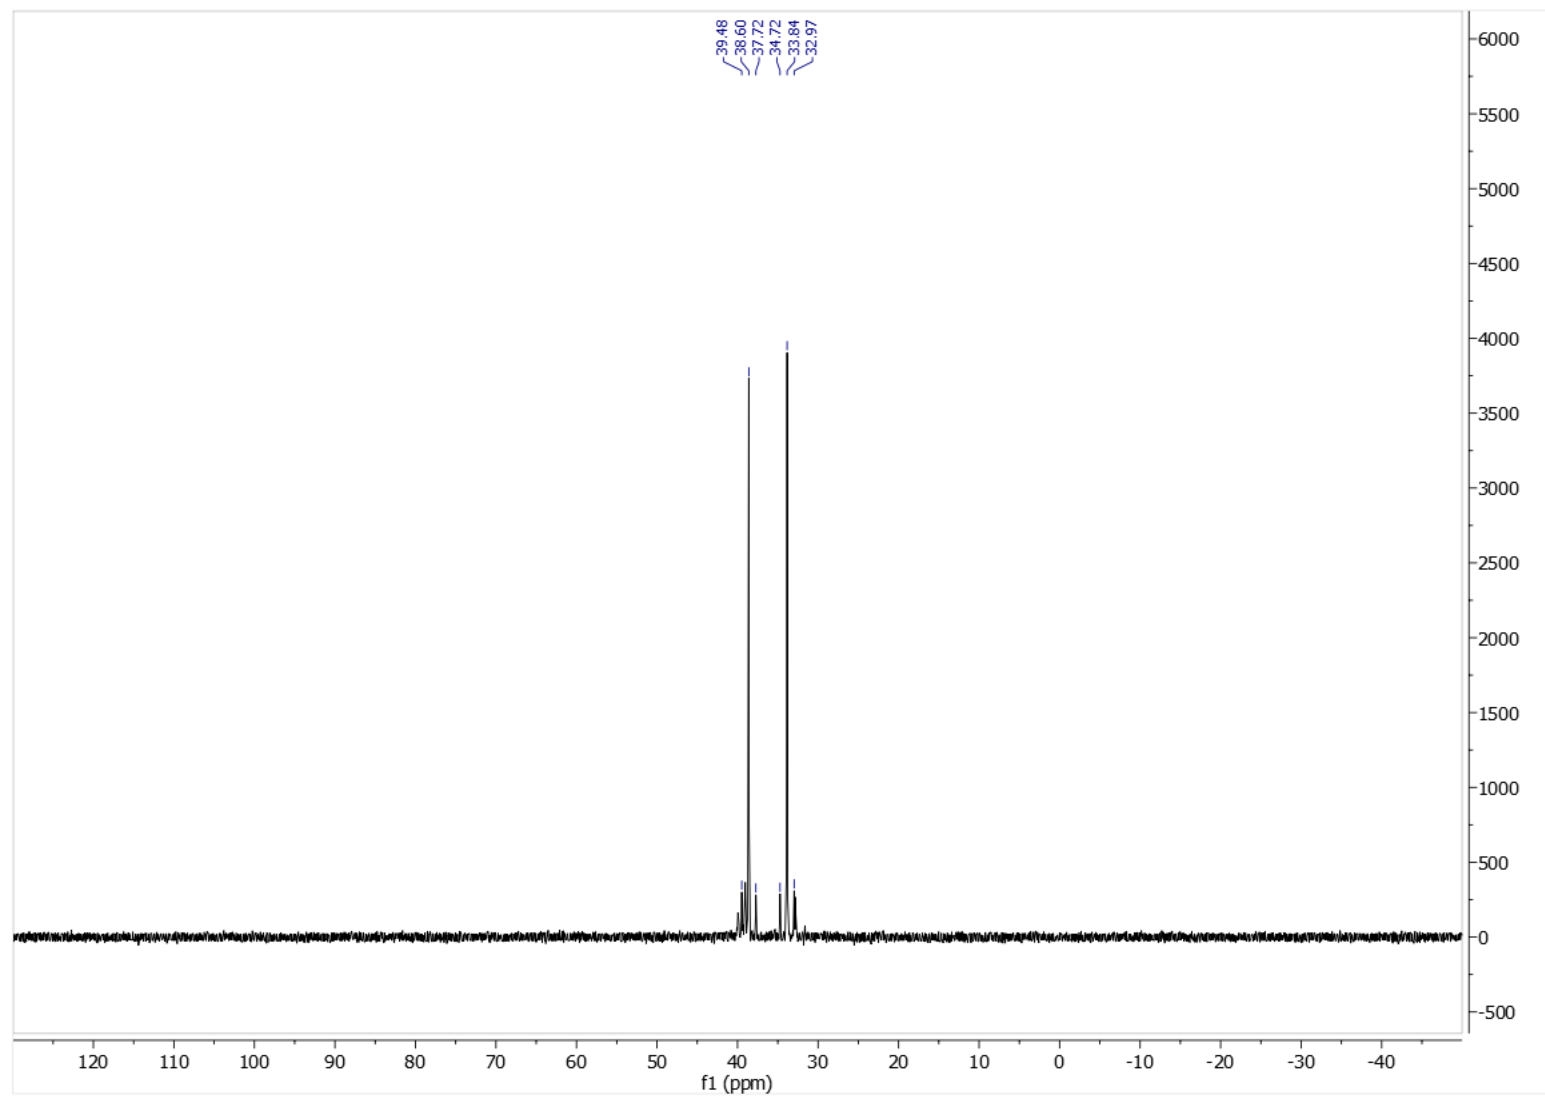

3.3.3 **Figure S6.**  $^{11}\text{B}$  NMR (128 MHz, THF- $d_6$ ) of **5**.

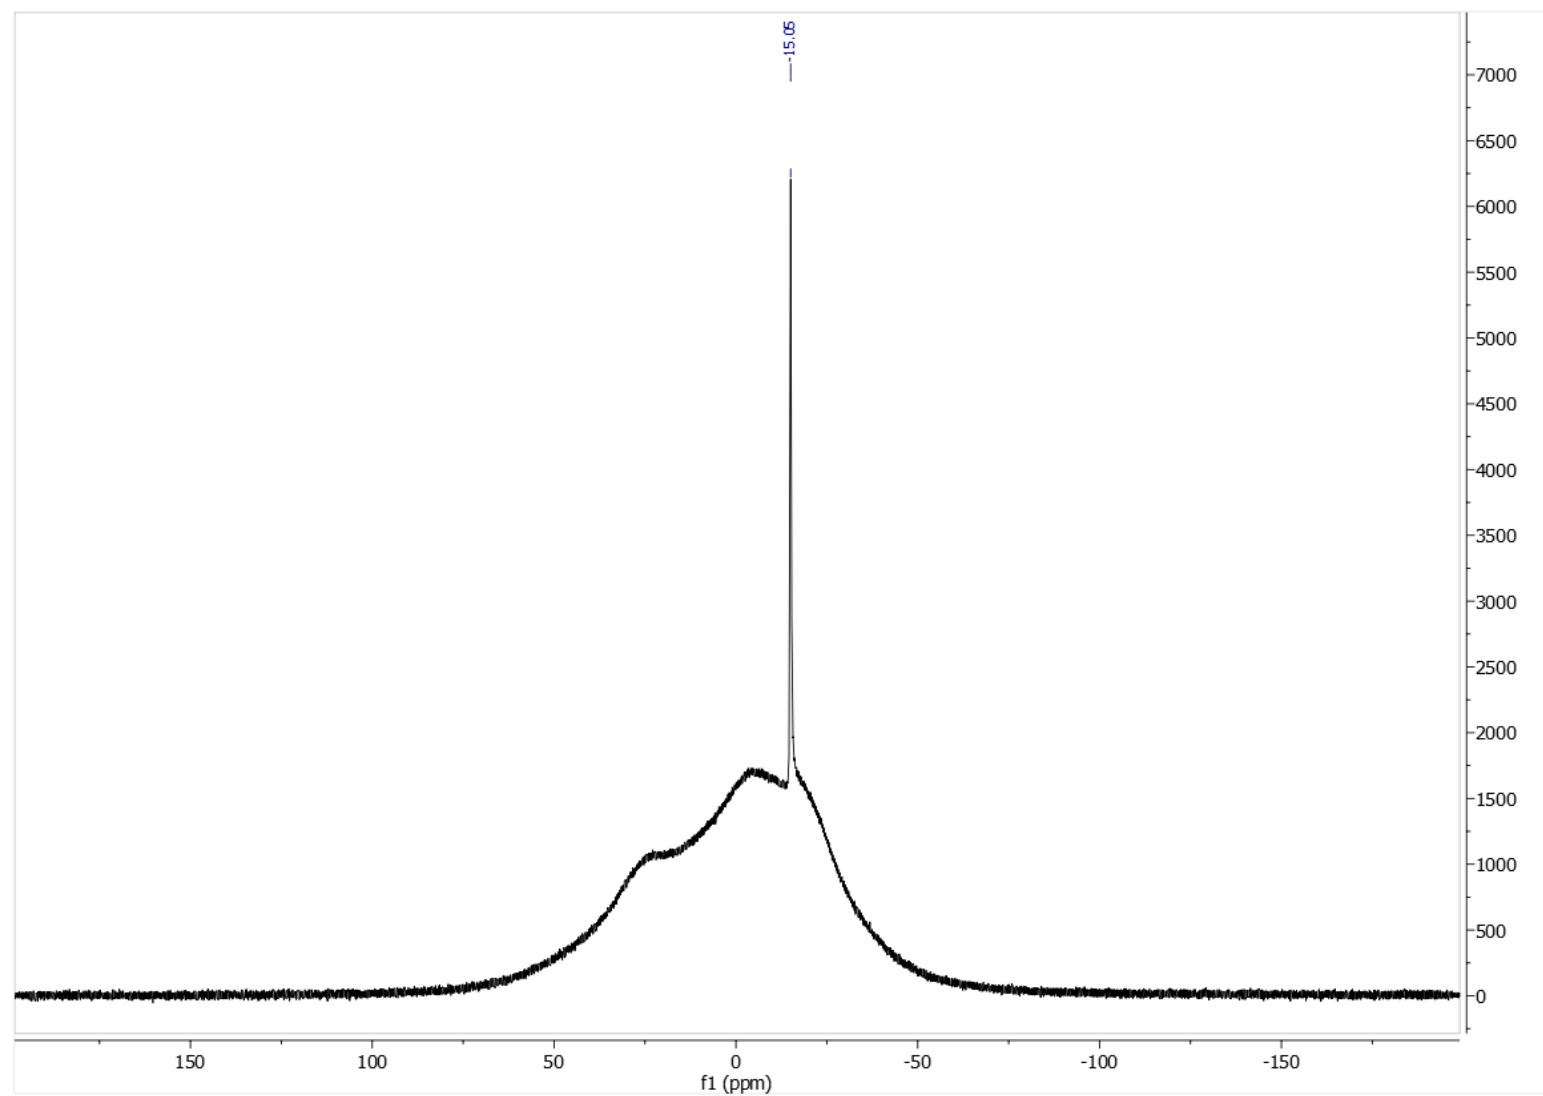

3.3.4 **Figure S7.**  $^{15}\text{N}$  INVGATED  $^1\text{H}$  NMR (41 MHz,  $\text{C}_6\text{D}_6$ ) of **5**.

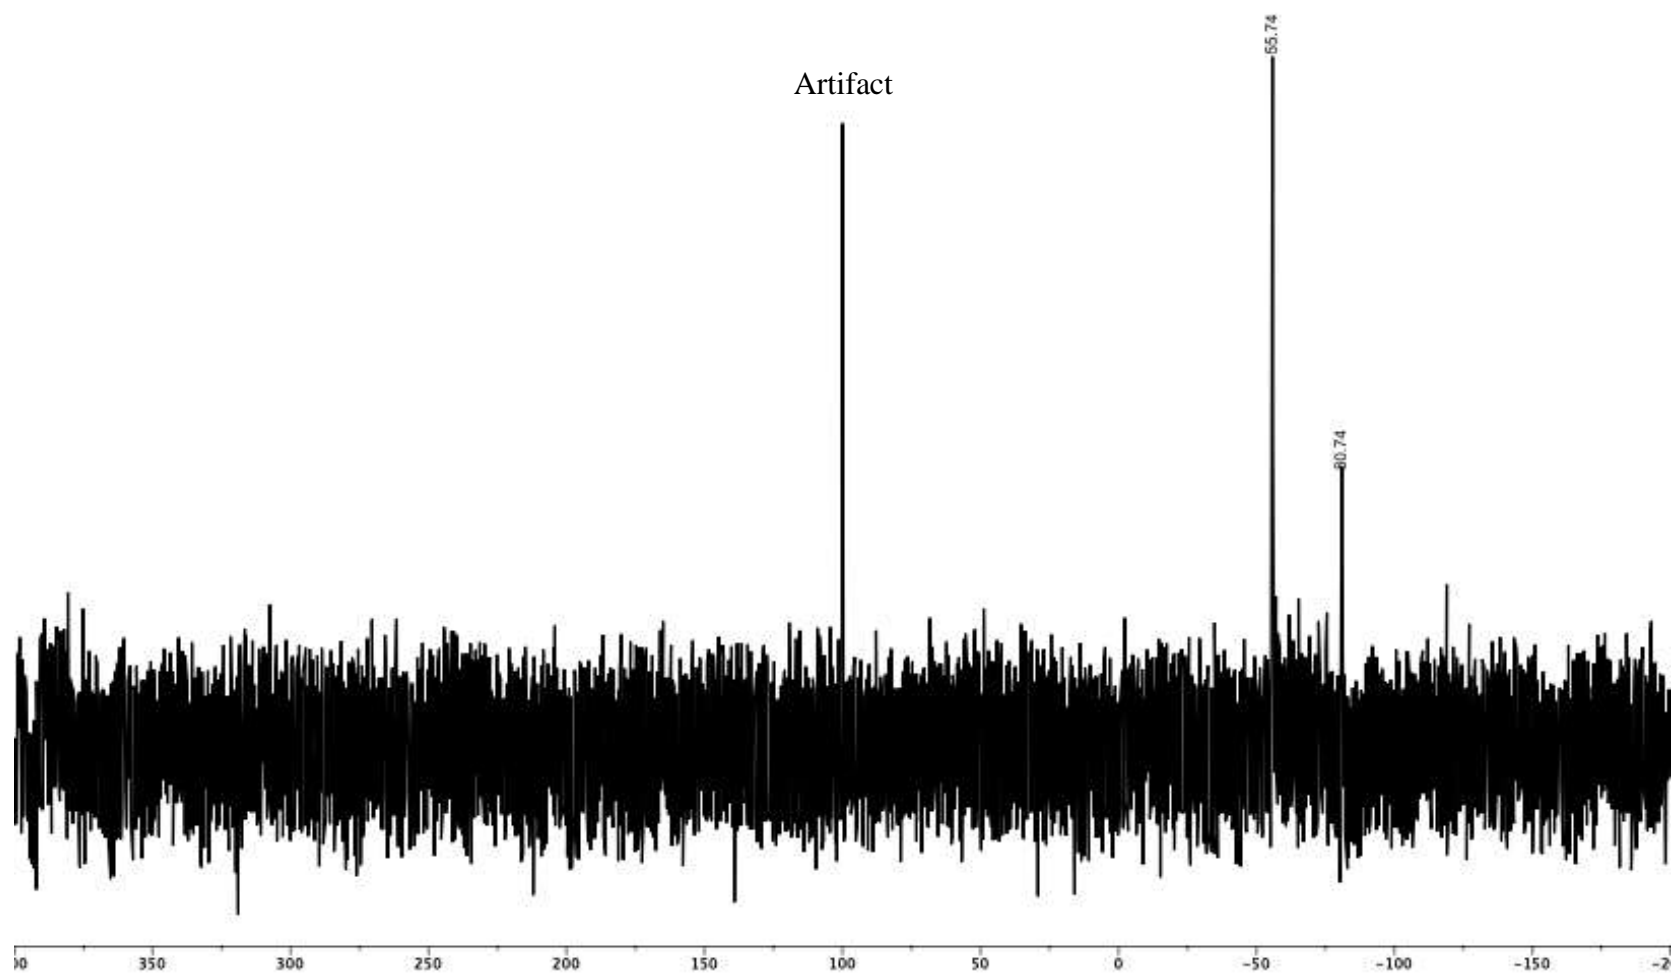



3.3.6 **Figure S9.** FT-IR (ATR) of **5**.

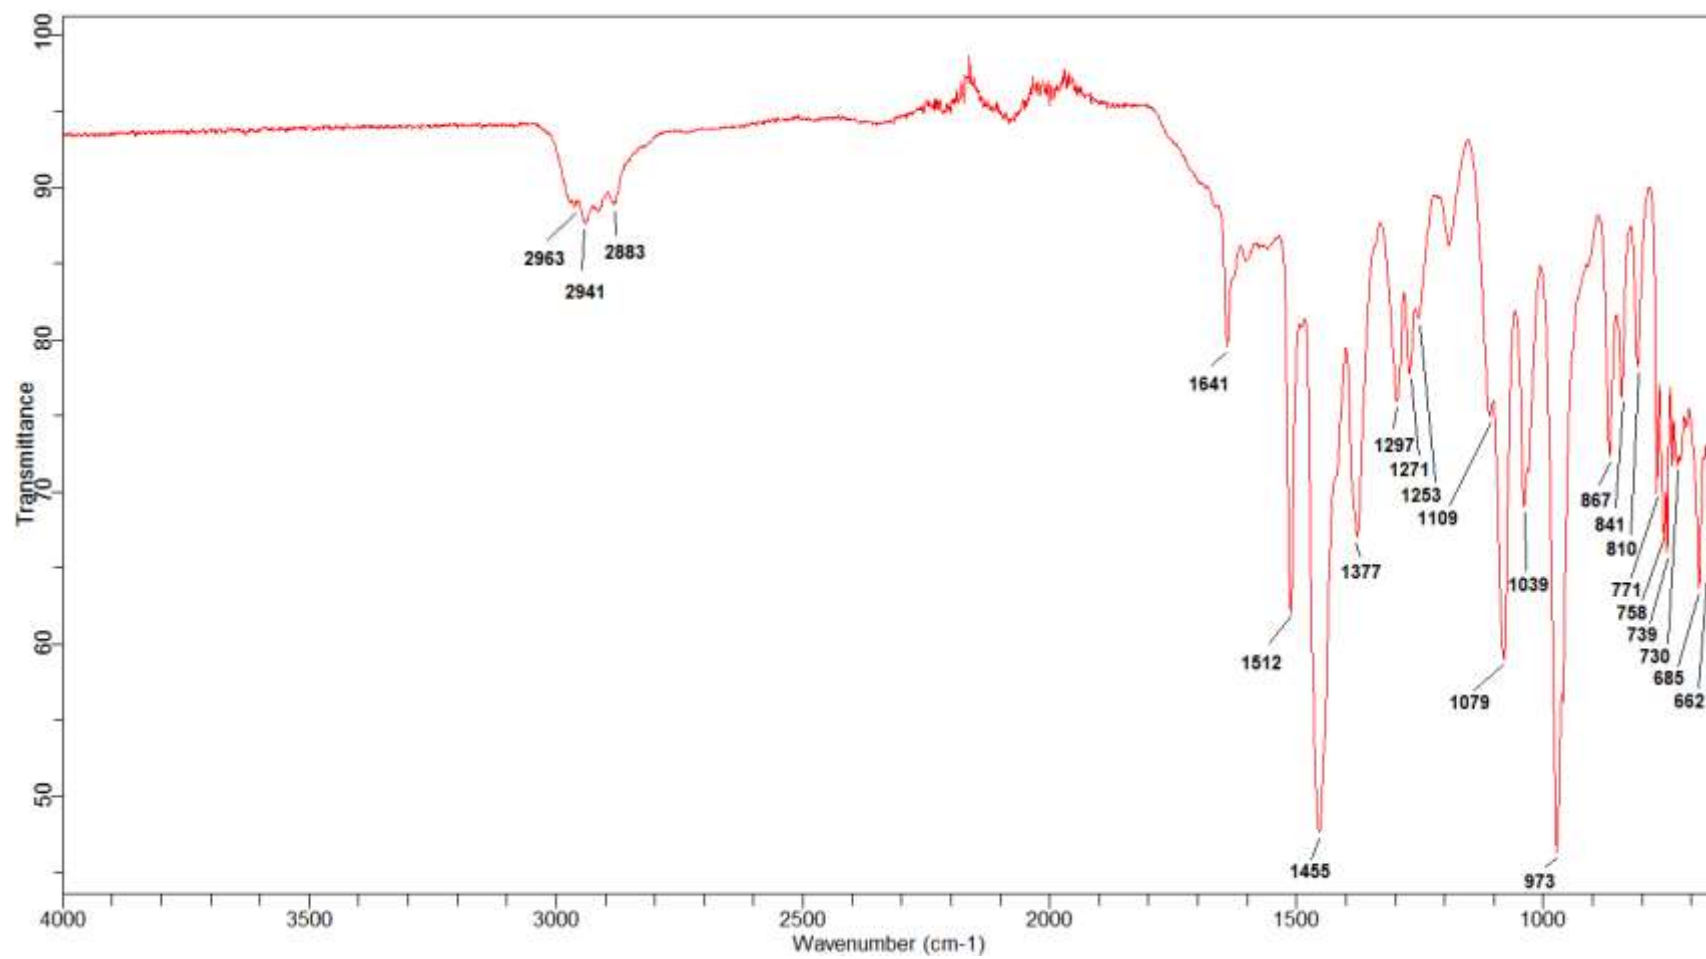



3.3.7 **Figure S10.** FT-IR (ATR) of  $^{15}\text{N-5}$ .

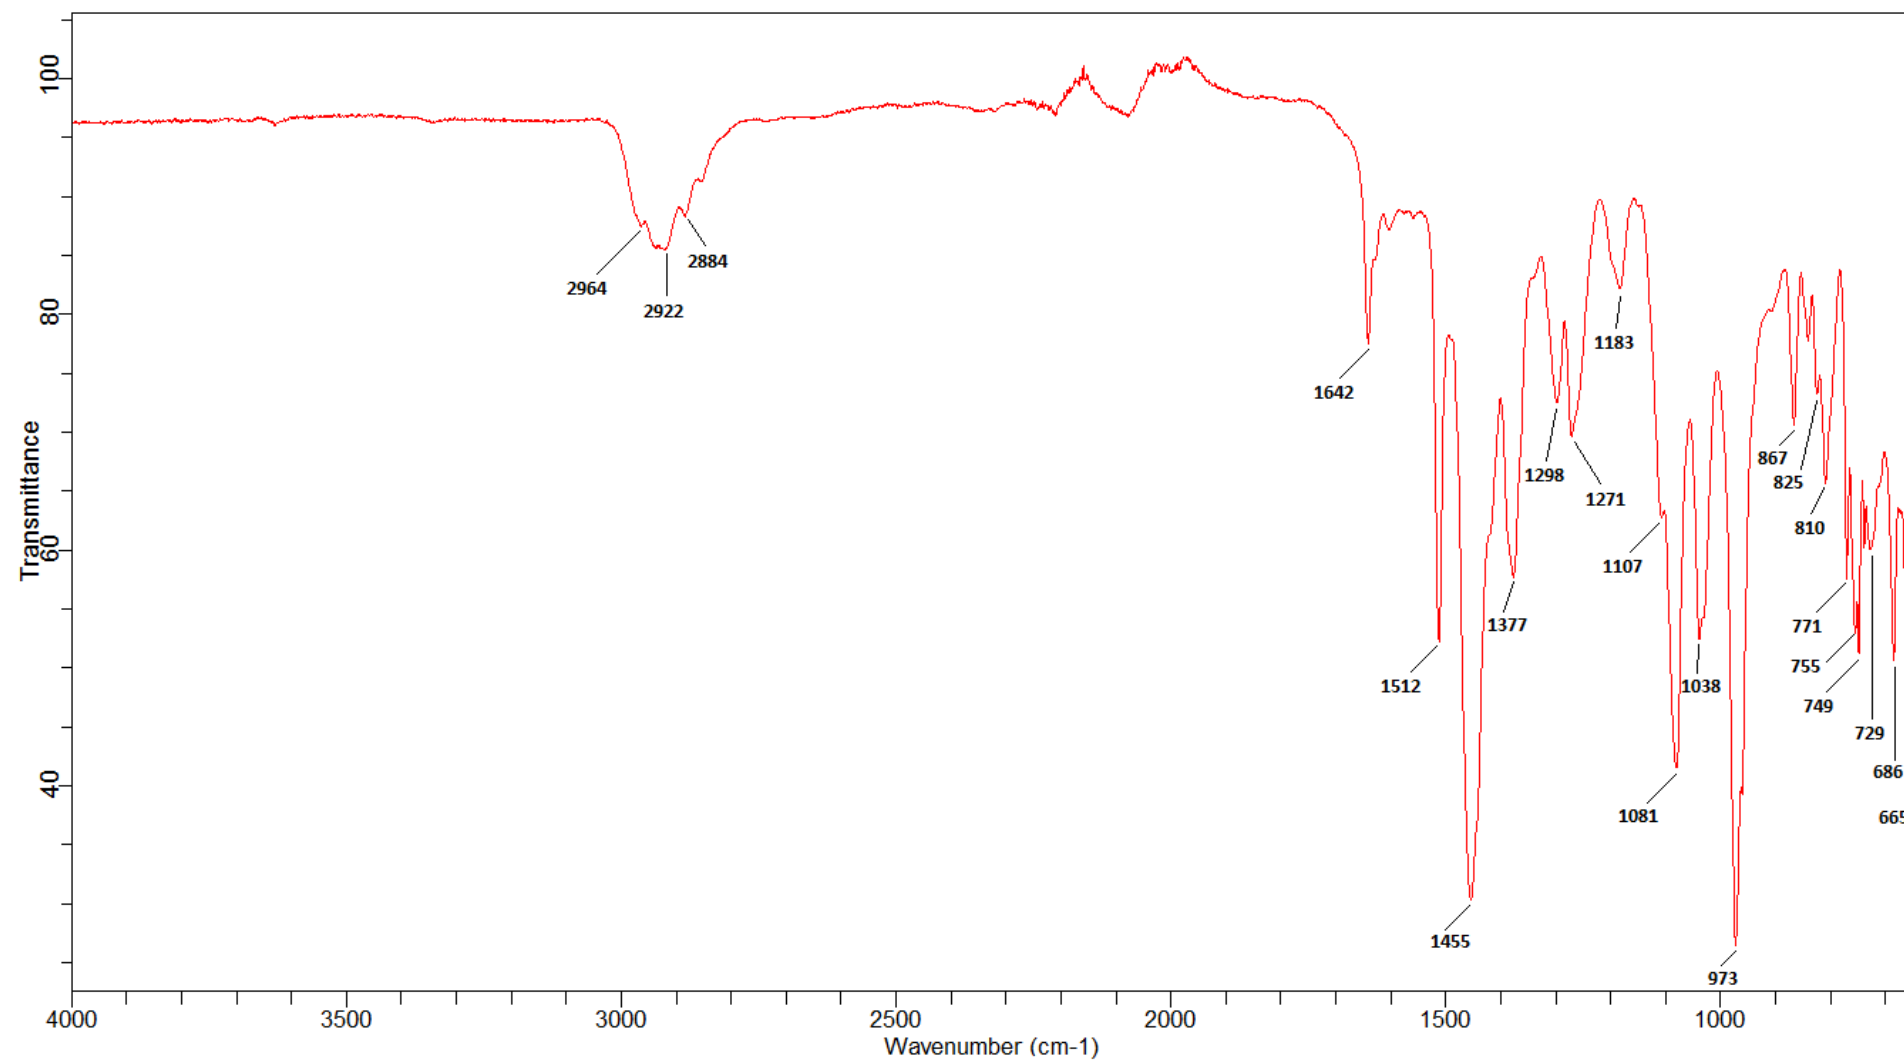

3.3.8 **Figure S11.** Raman spectrum of **5**.

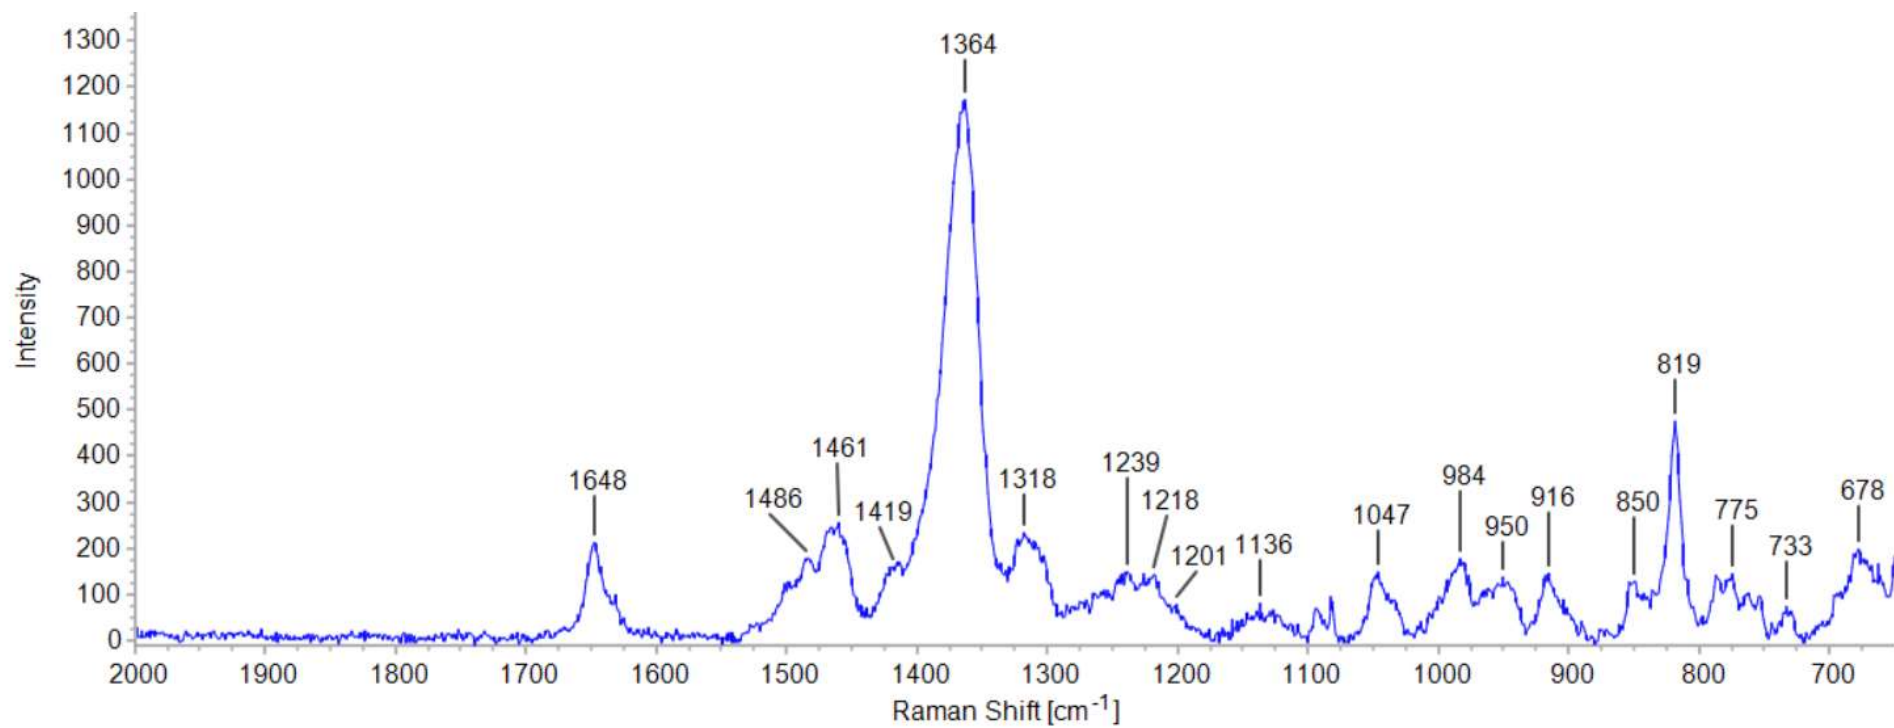

3.3.9 **Figure S12.** Raman spectrum of  $^{15}\text{N-5}$ .

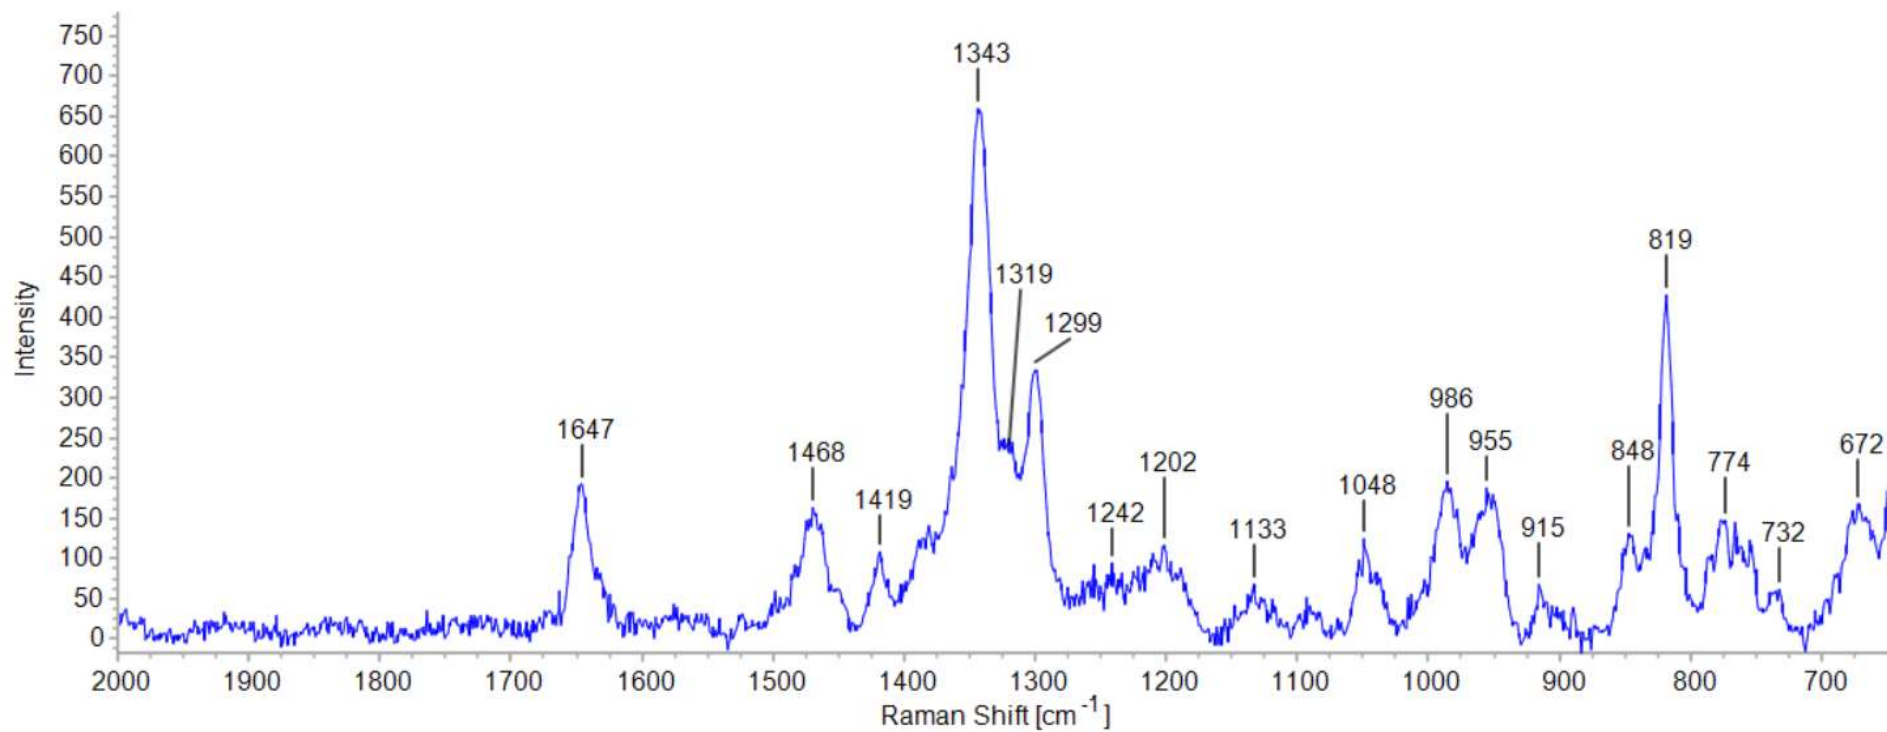

### 3.4 [W(depe)<sub>2</sub>(H)<sub>2</sub>(μ-N<sub>2</sub>)B(C<sub>6</sub>F<sub>5</sub>)(C<sub>6</sub>F<sub>4</sub>{B(C<sub>6</sub>F<sub>5</sub>)<sub>3</sub>})] (6)

#### 3.4.1 Figure S13. <sup>1</sup>H NMR (400 MHz, THF-d<sub>8</sub>) of 6 isomers.

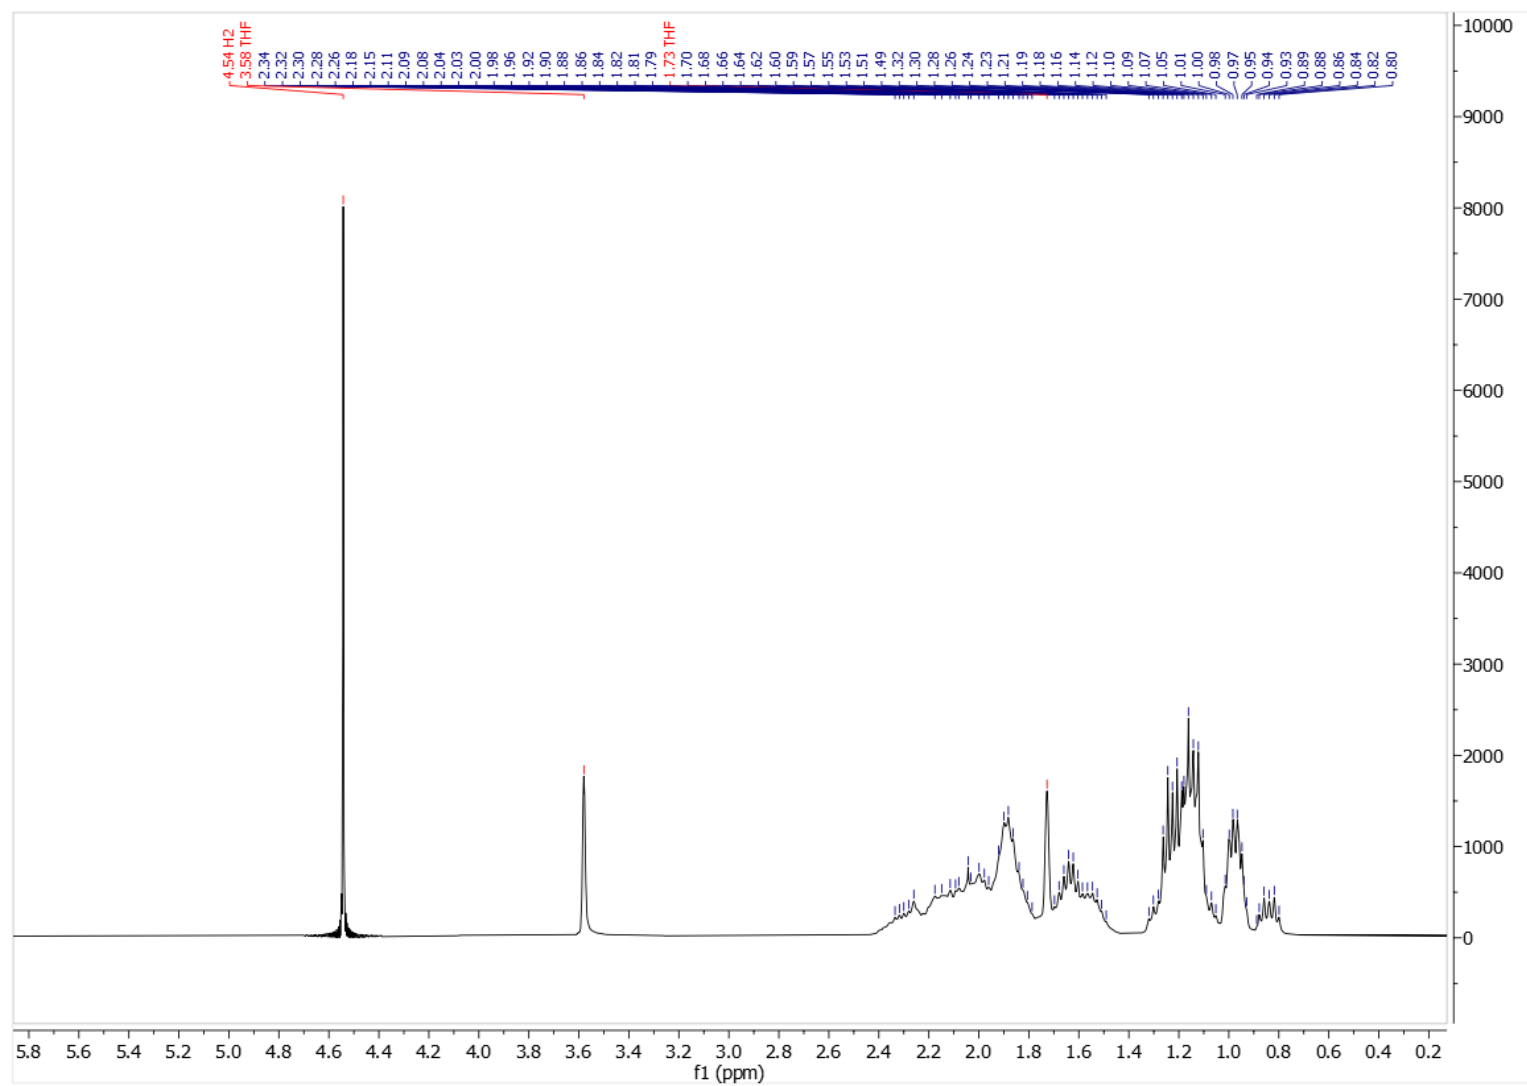

3.4.2 **Figure S14.**  $^{31}\text{P}\{^1\text{H}\}$  NMR (162 MHz, THF- $d_6$ ) of **6** isomers.

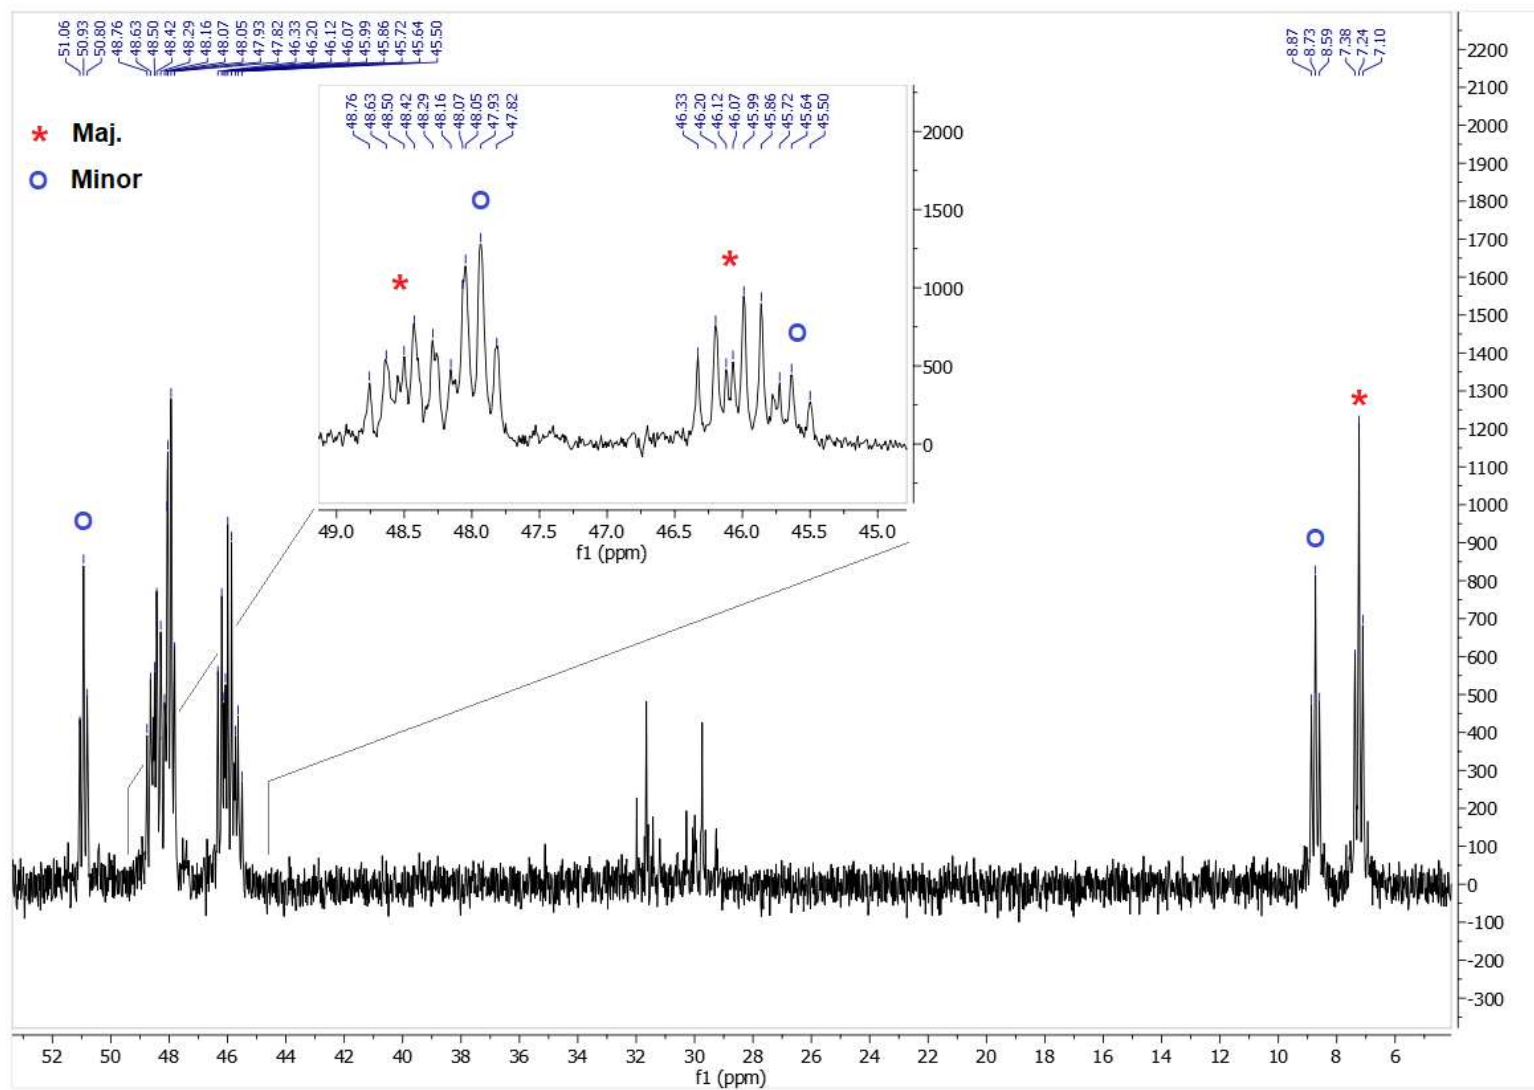

3.4.3 **Figure S15.**  $^{11}\text{B}$  NMR (128 MHz,  $\text{THF-d}_8$ ) of **6** isomers.

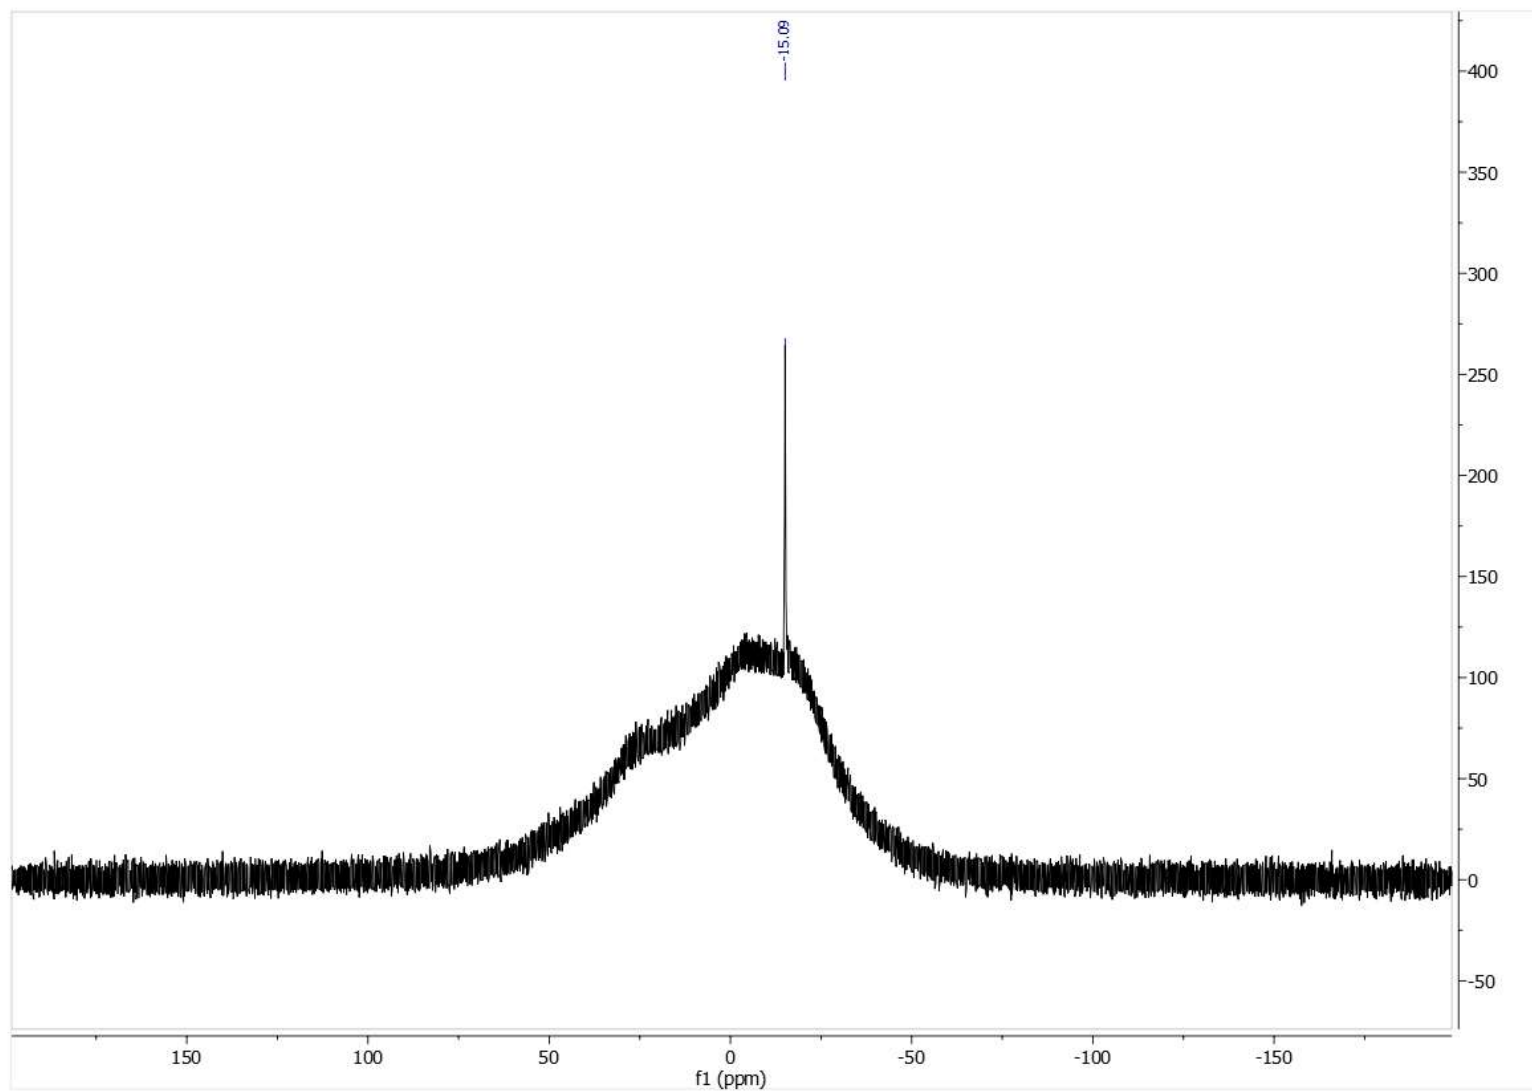

3.4.4 Figure S16.  $^{19}\text{F}$  NMR (376 MHz,  $\text{THF-d}_8$ ) of **6** isomers.

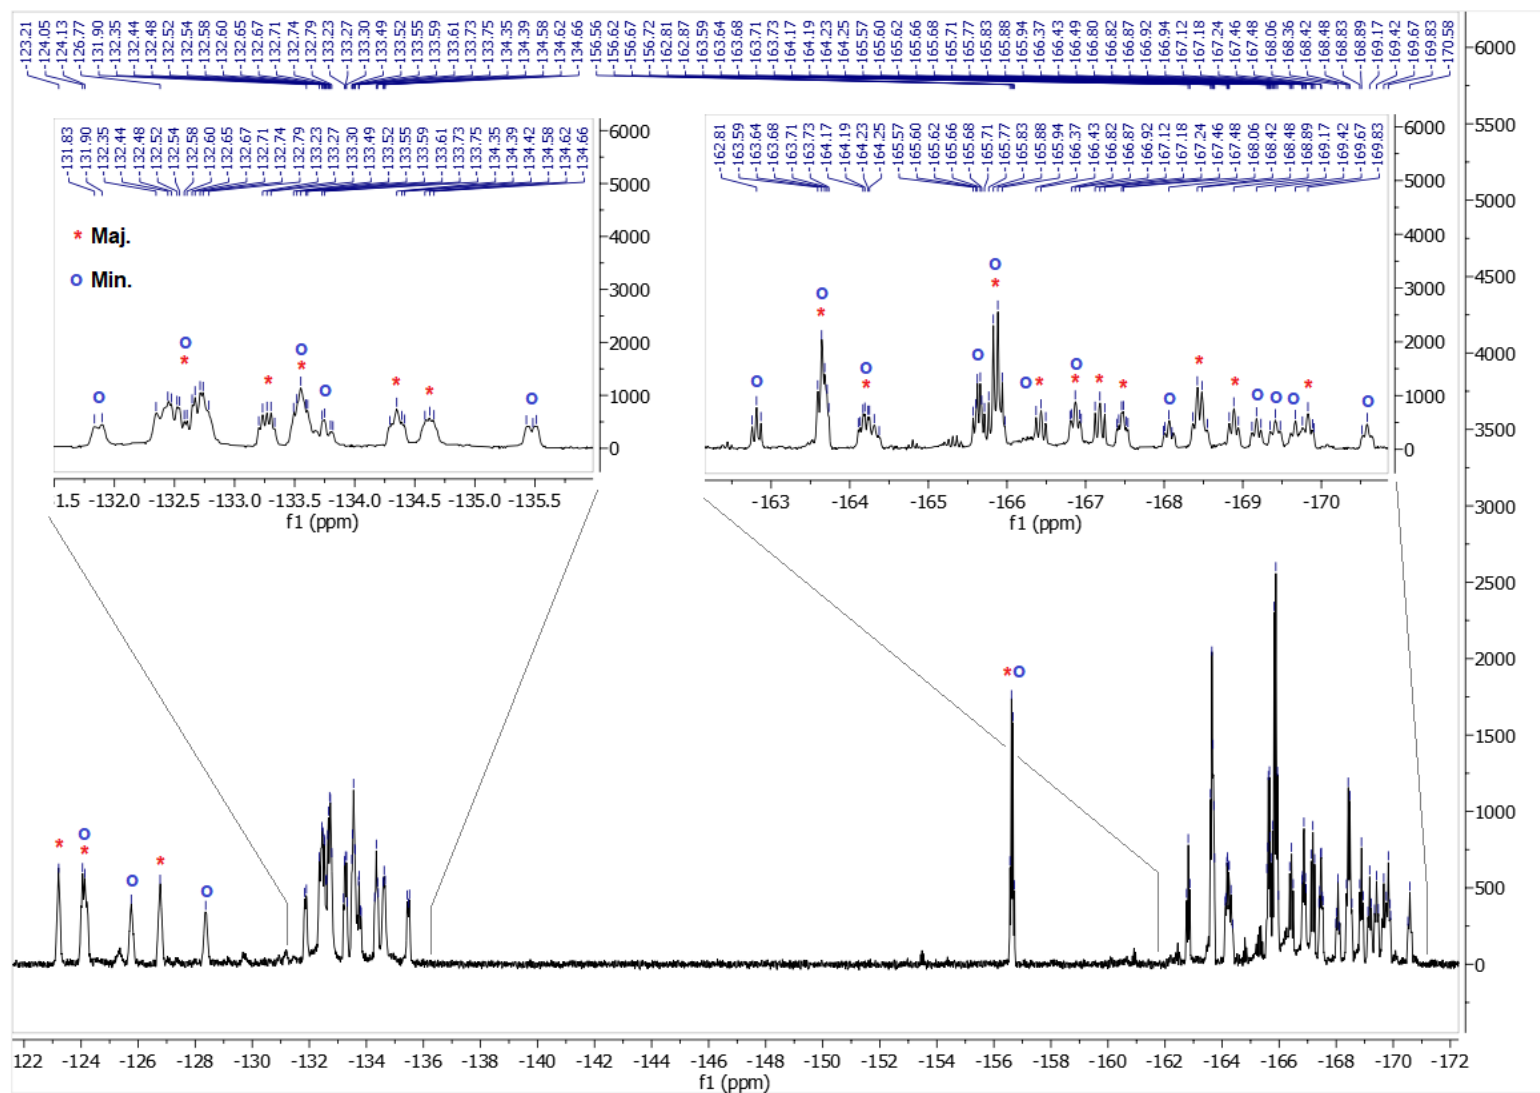

3.4.5 **Figure S17.**  $^{15}\text{N}$  INVGATED  $^1\text{H}$  NMR (41 MHz,  $\text{THF-d}_6$ ) of **6** isomers.

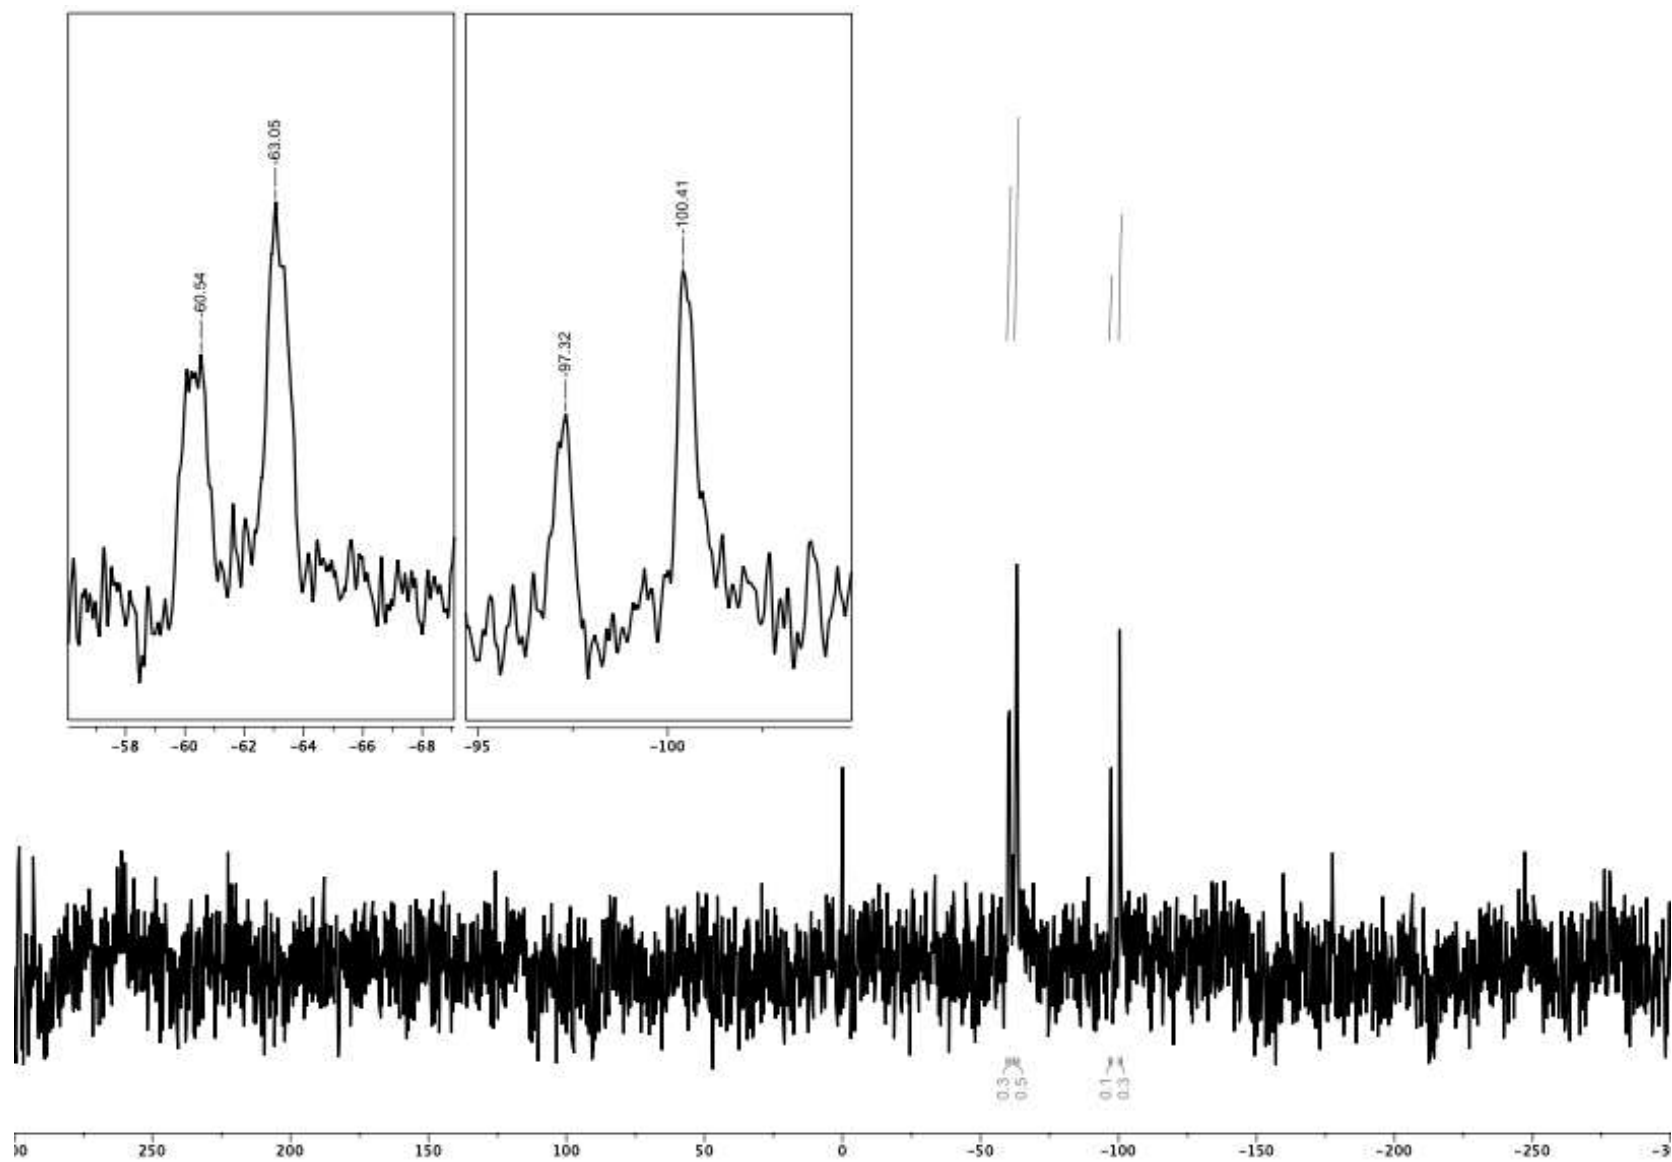



3.5 II. 6.  $[W(\text{depe})_2(\text{H})_2(\mu\text{-N}_2)(1,2\text{-}(\text{B}(\text{C}_6\text{F}_5)_2)_2\text{C}_6\text{F}_4)]$  (7)

3.5.1 Figure S18.  $^1\text{H}$  NMR (400 MHz,  $\text{THF-d}_8$ ) of 7.

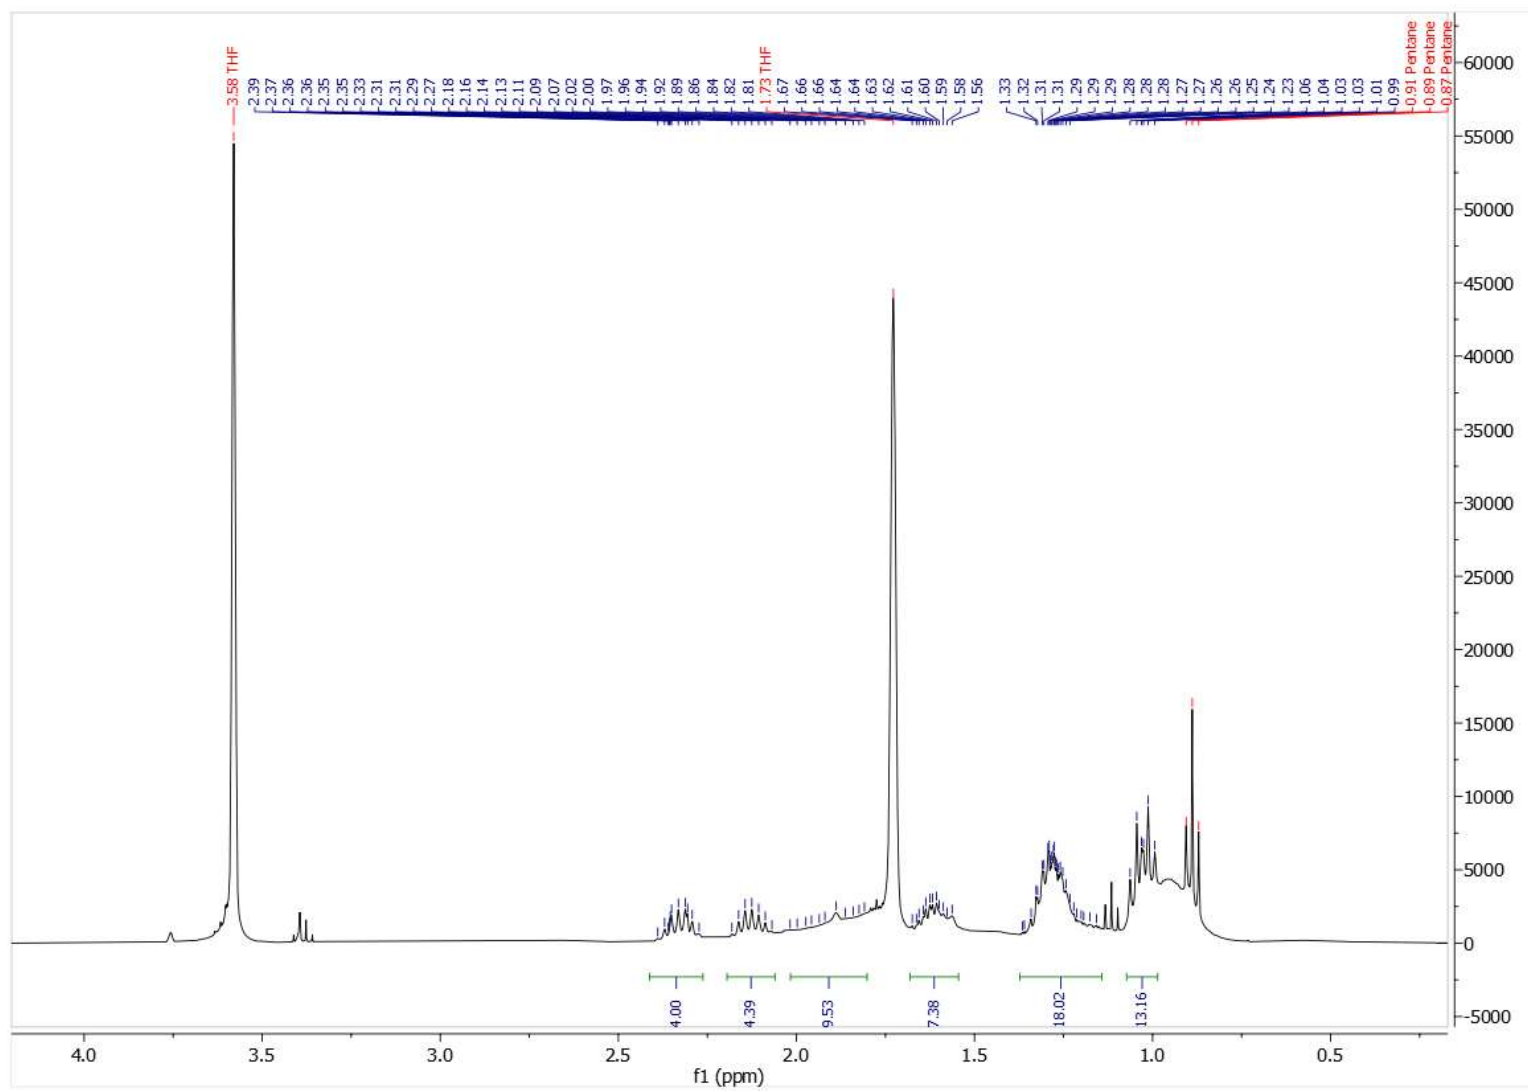

3.5.2 **Figure S19.**  $^{31}\text{P}\{^1\text{H}\}$  NMR (162 MHz, THF- $d_6$ ) of **7**.

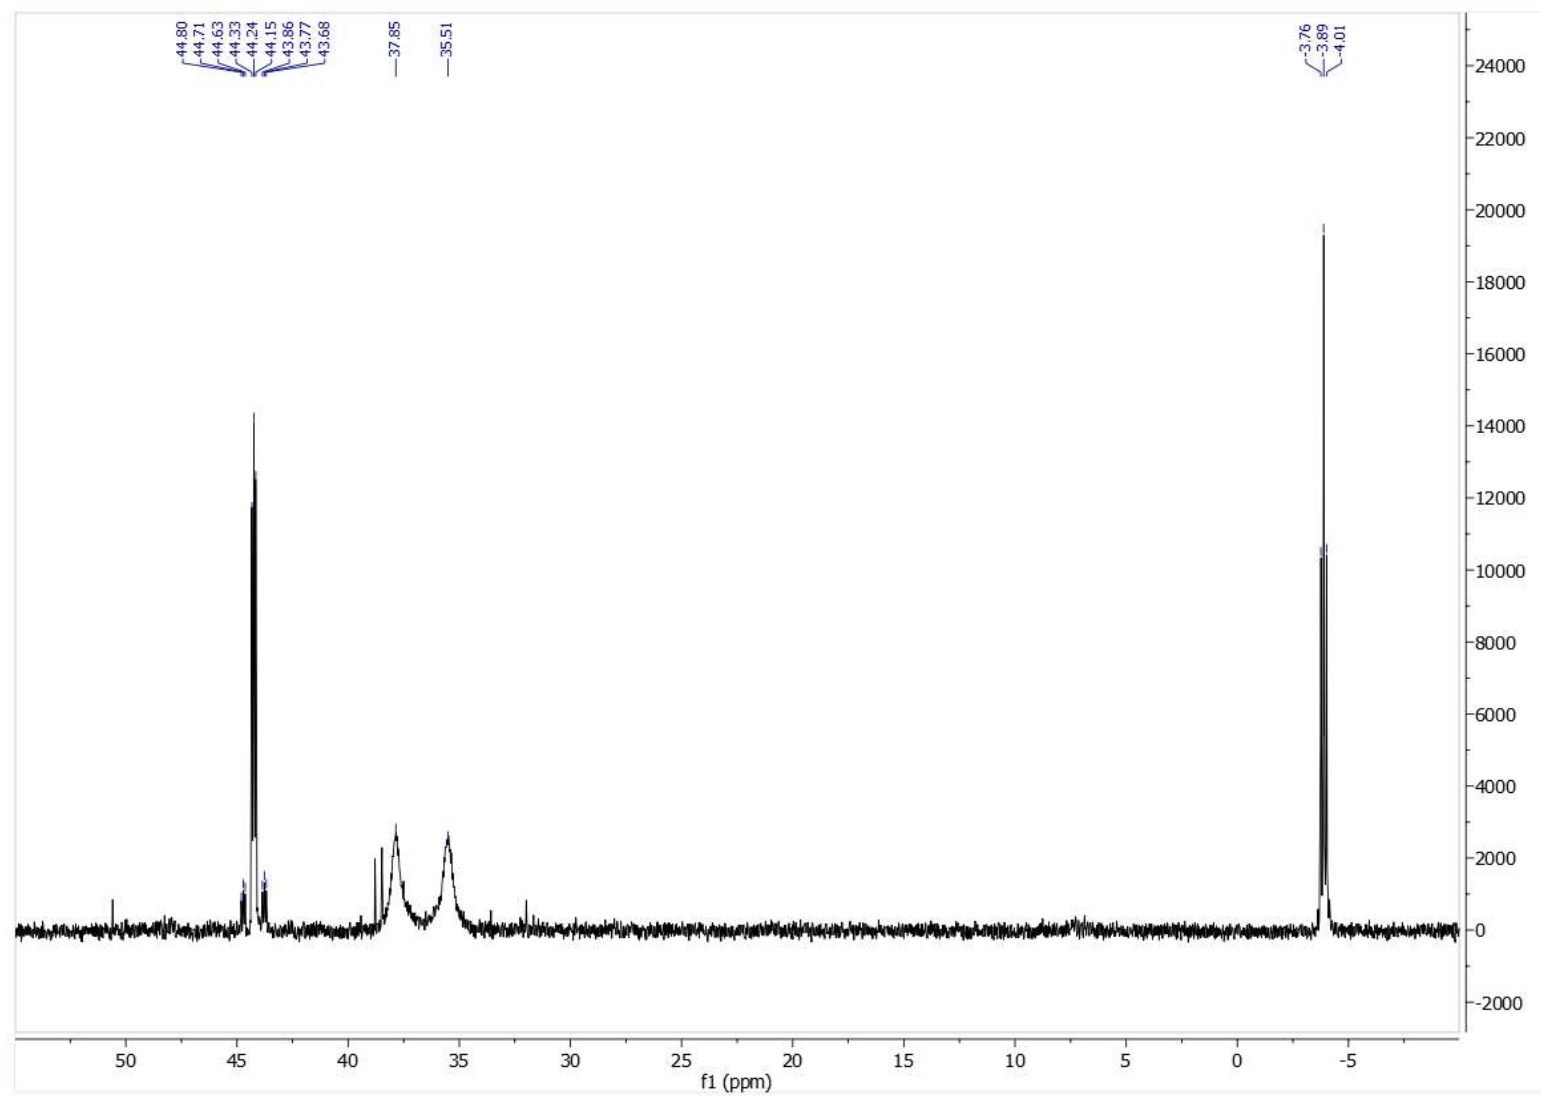

3.5.3 **Figure S20.**  $^{11}\text{B}$  NMR (128 MHz,  $\text{THF-d}_8$ ) of **7**.

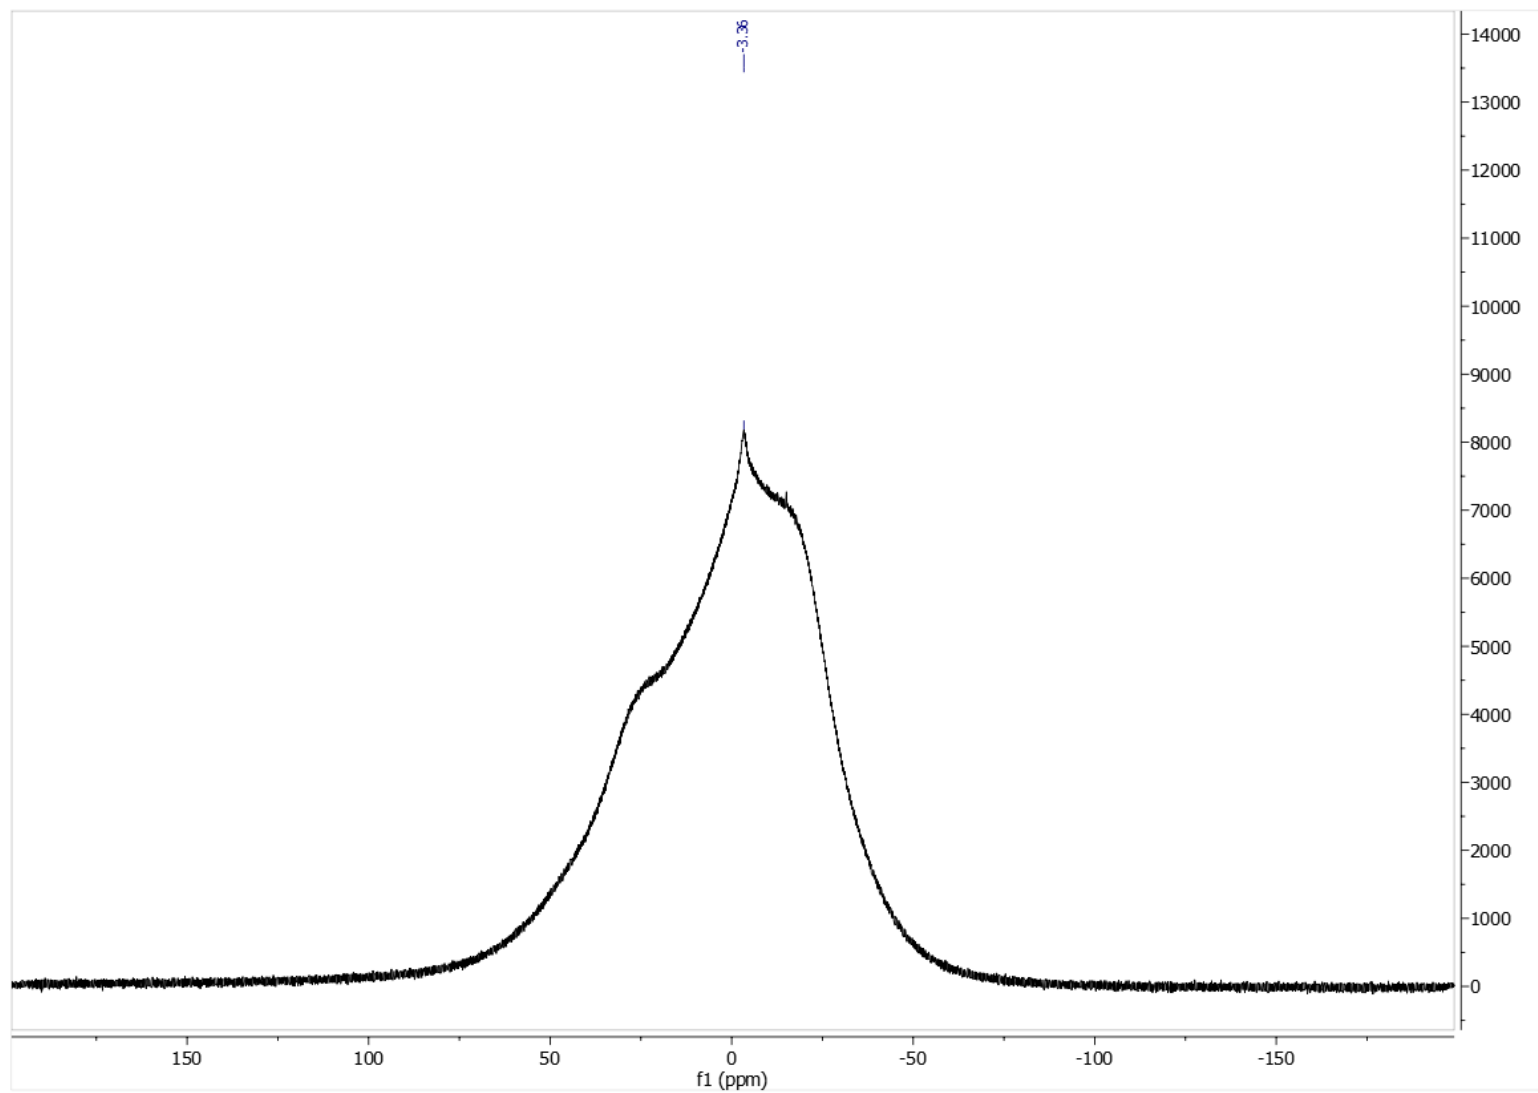

3.5.4 **Figure S21.**  $^{19}\text{F}$  NMR (376 MHz,  $\text{THF-d}_8$ ) of **7**.

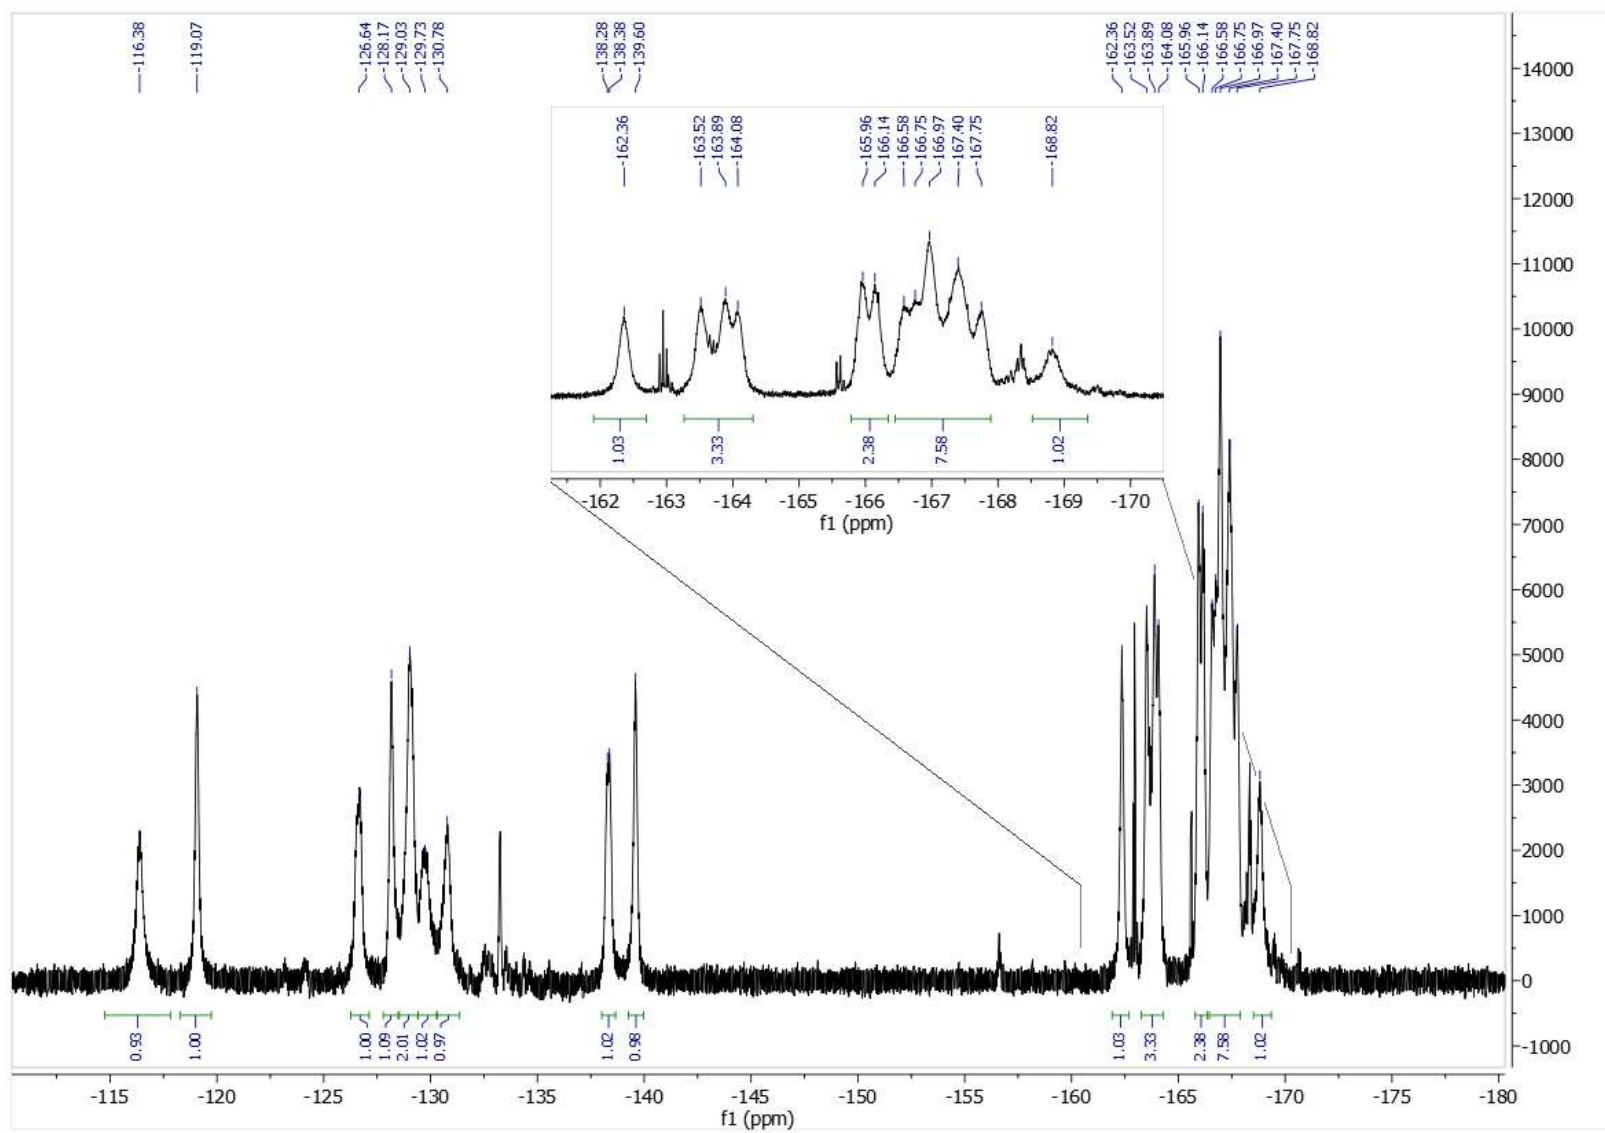

3.5.5 **Figure S22.** FT-IR (ATR) of 7.

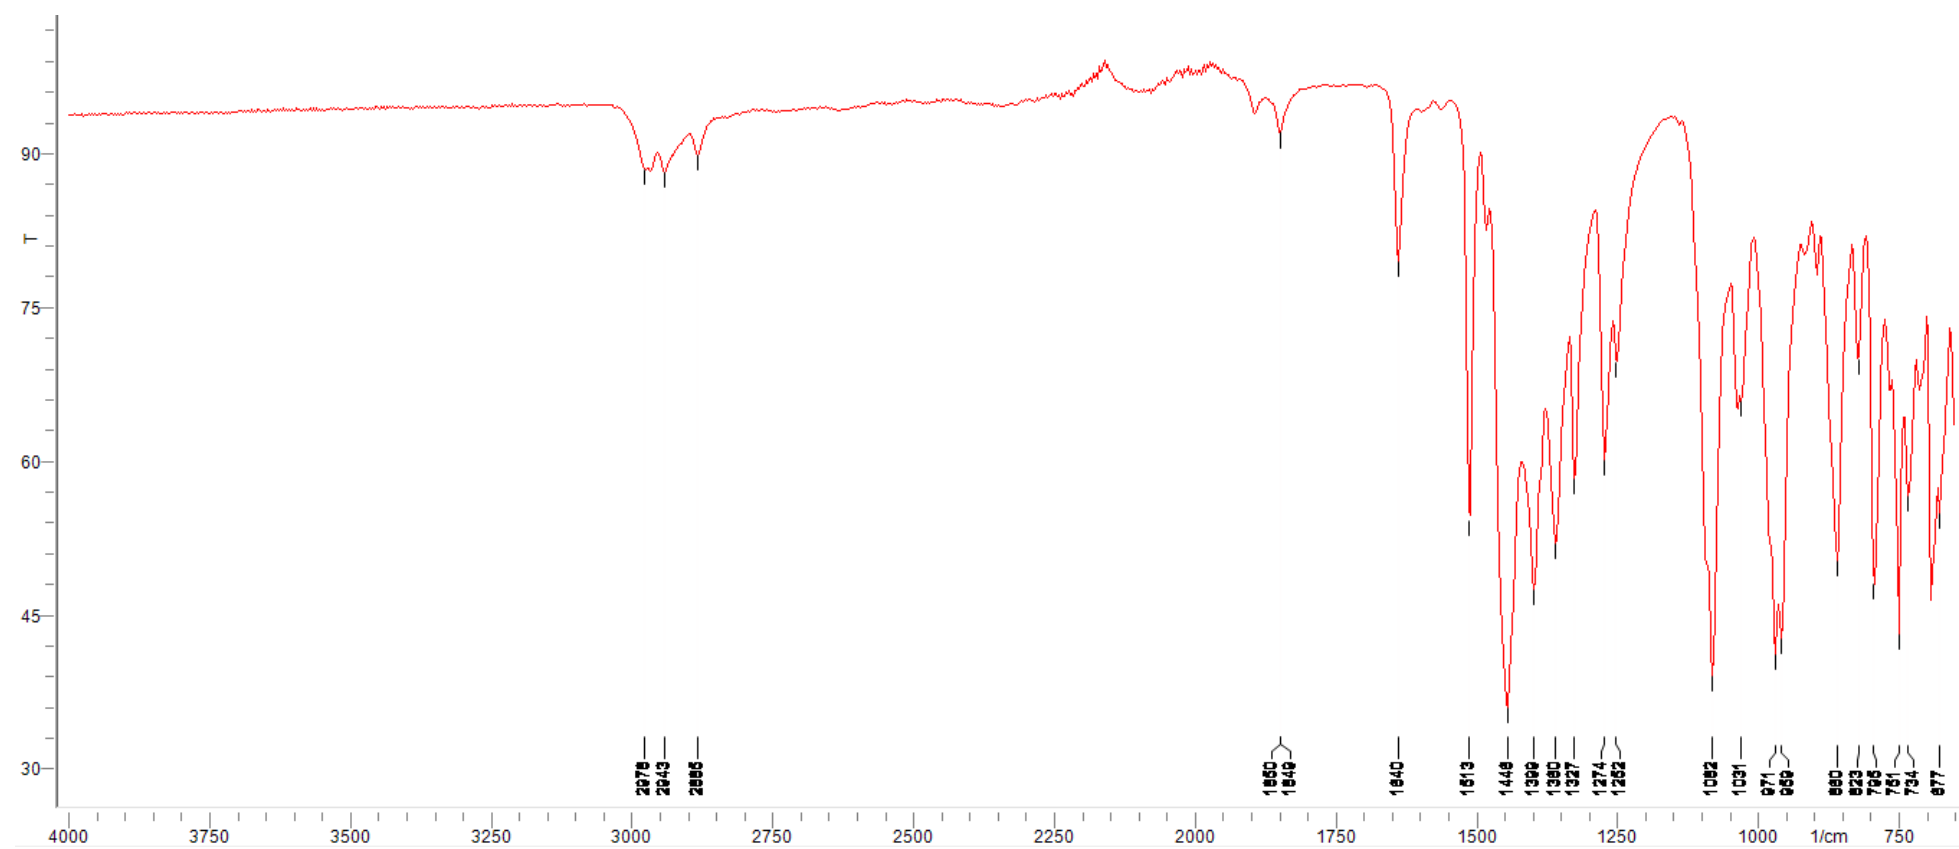

3.5.6 **Figure S23.** FT-IR (ATR) of  $^{15}\text{N-7}$ .

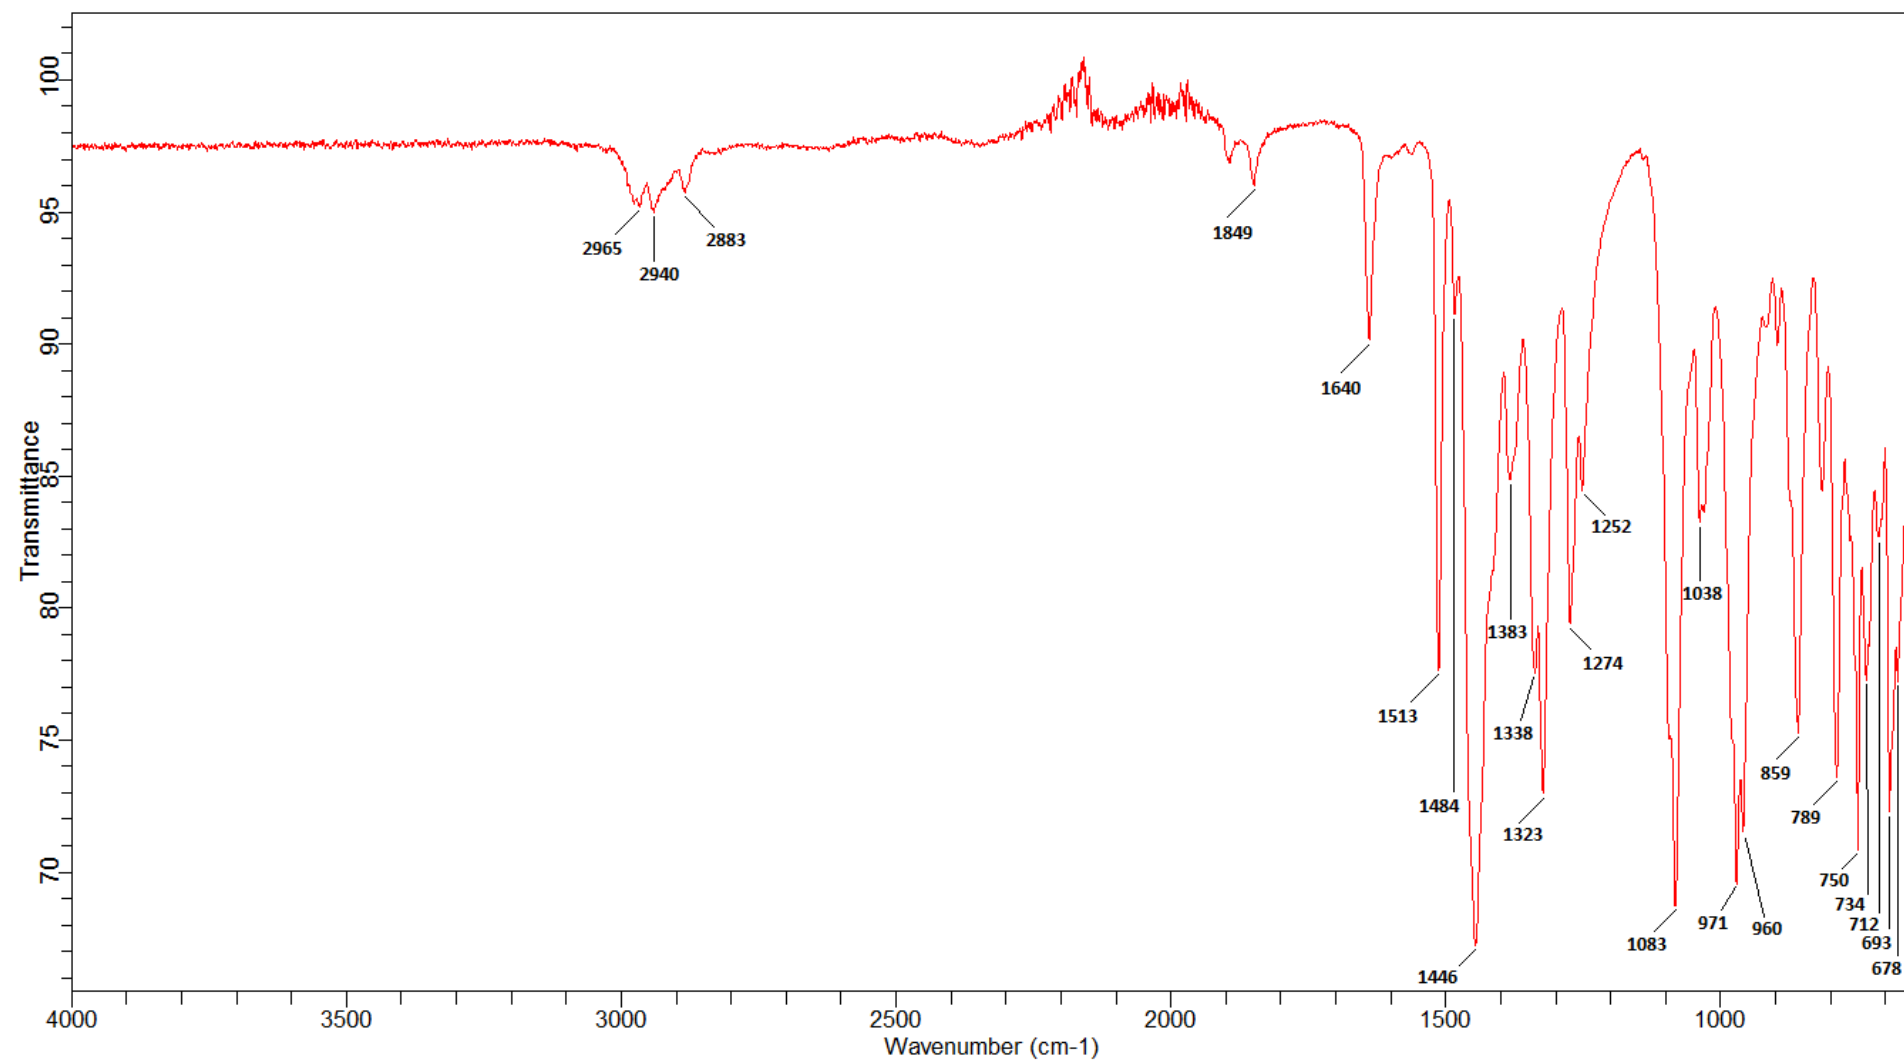

3.5.7 **Figure S24.** Raman spectrum of **7**.

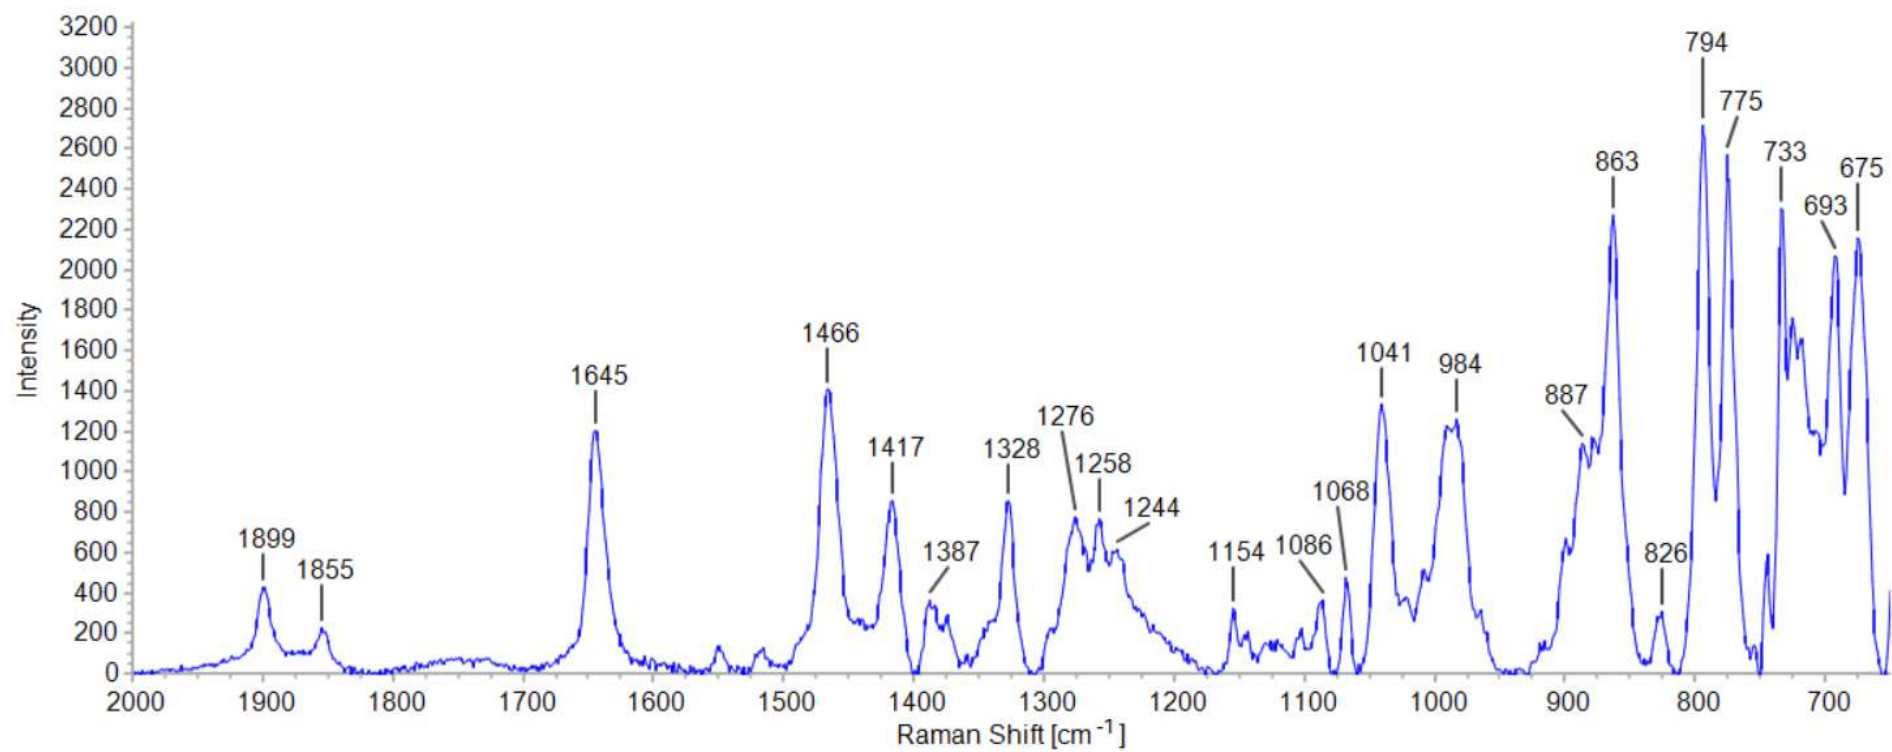

3.5.8 **Figure S25.** Raman spectrum of  $^{15}\text{N-7}$ .

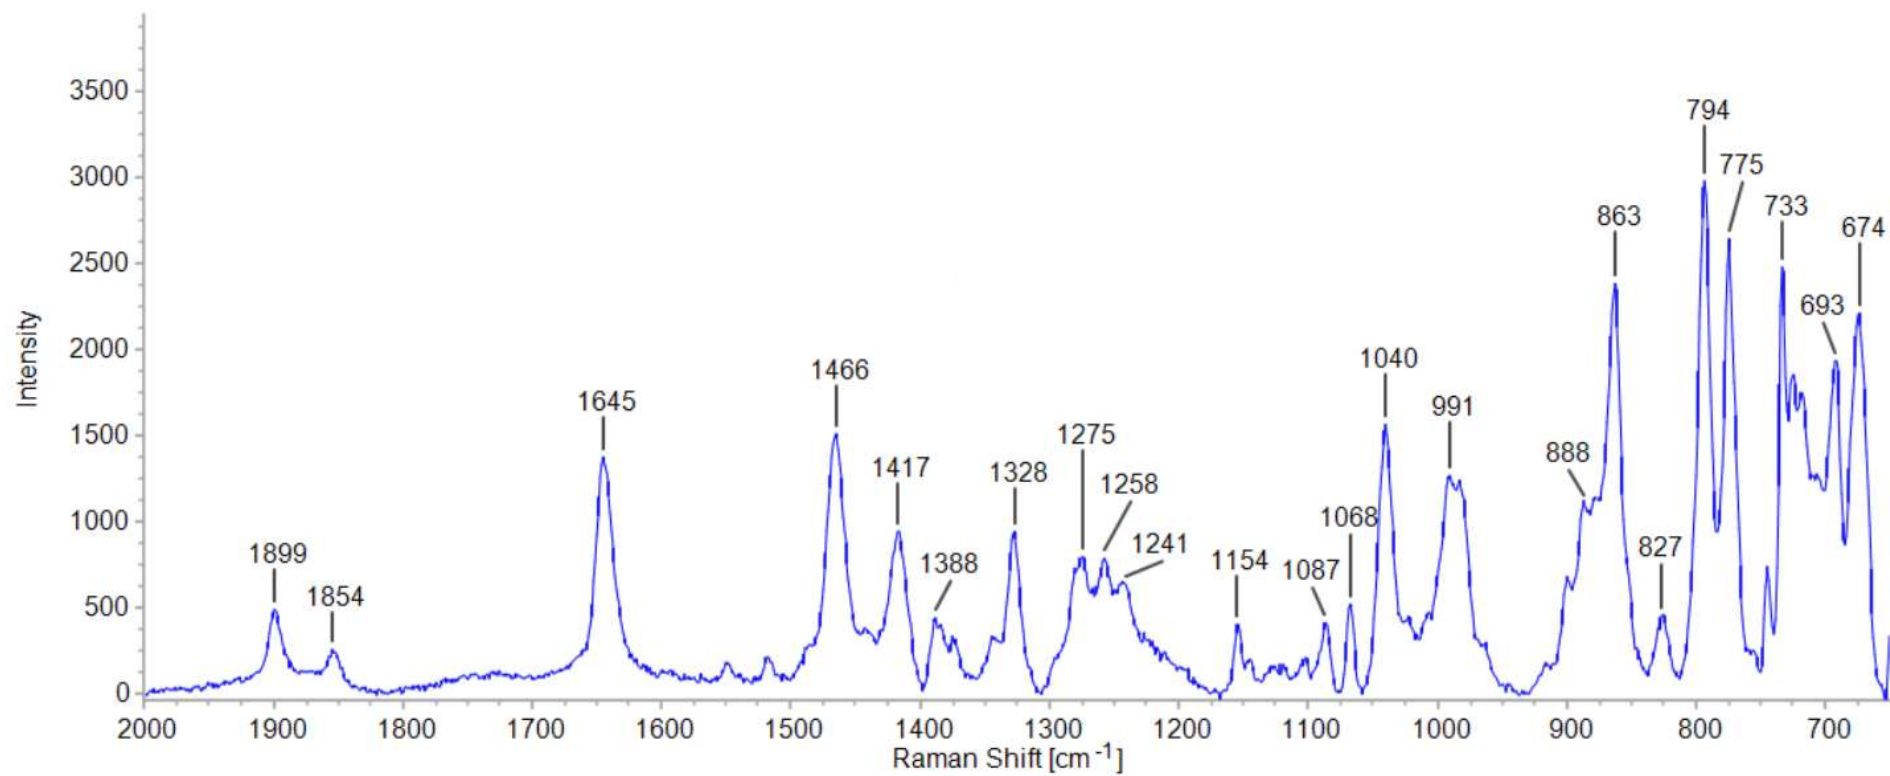



3.6 [W(depe)<sub>2</sub>(H)<sub>2</sub>(μ-N<sub>2</sub>)B(C<sub>6</sub>F<sub>5</sub>)<sub>3</sub>] (10)

3.6.1 Figure S26. <sup>1</sup>H NMR (400 MHz, C<sub>6</sub>D<sub>6</sub>) of 10.

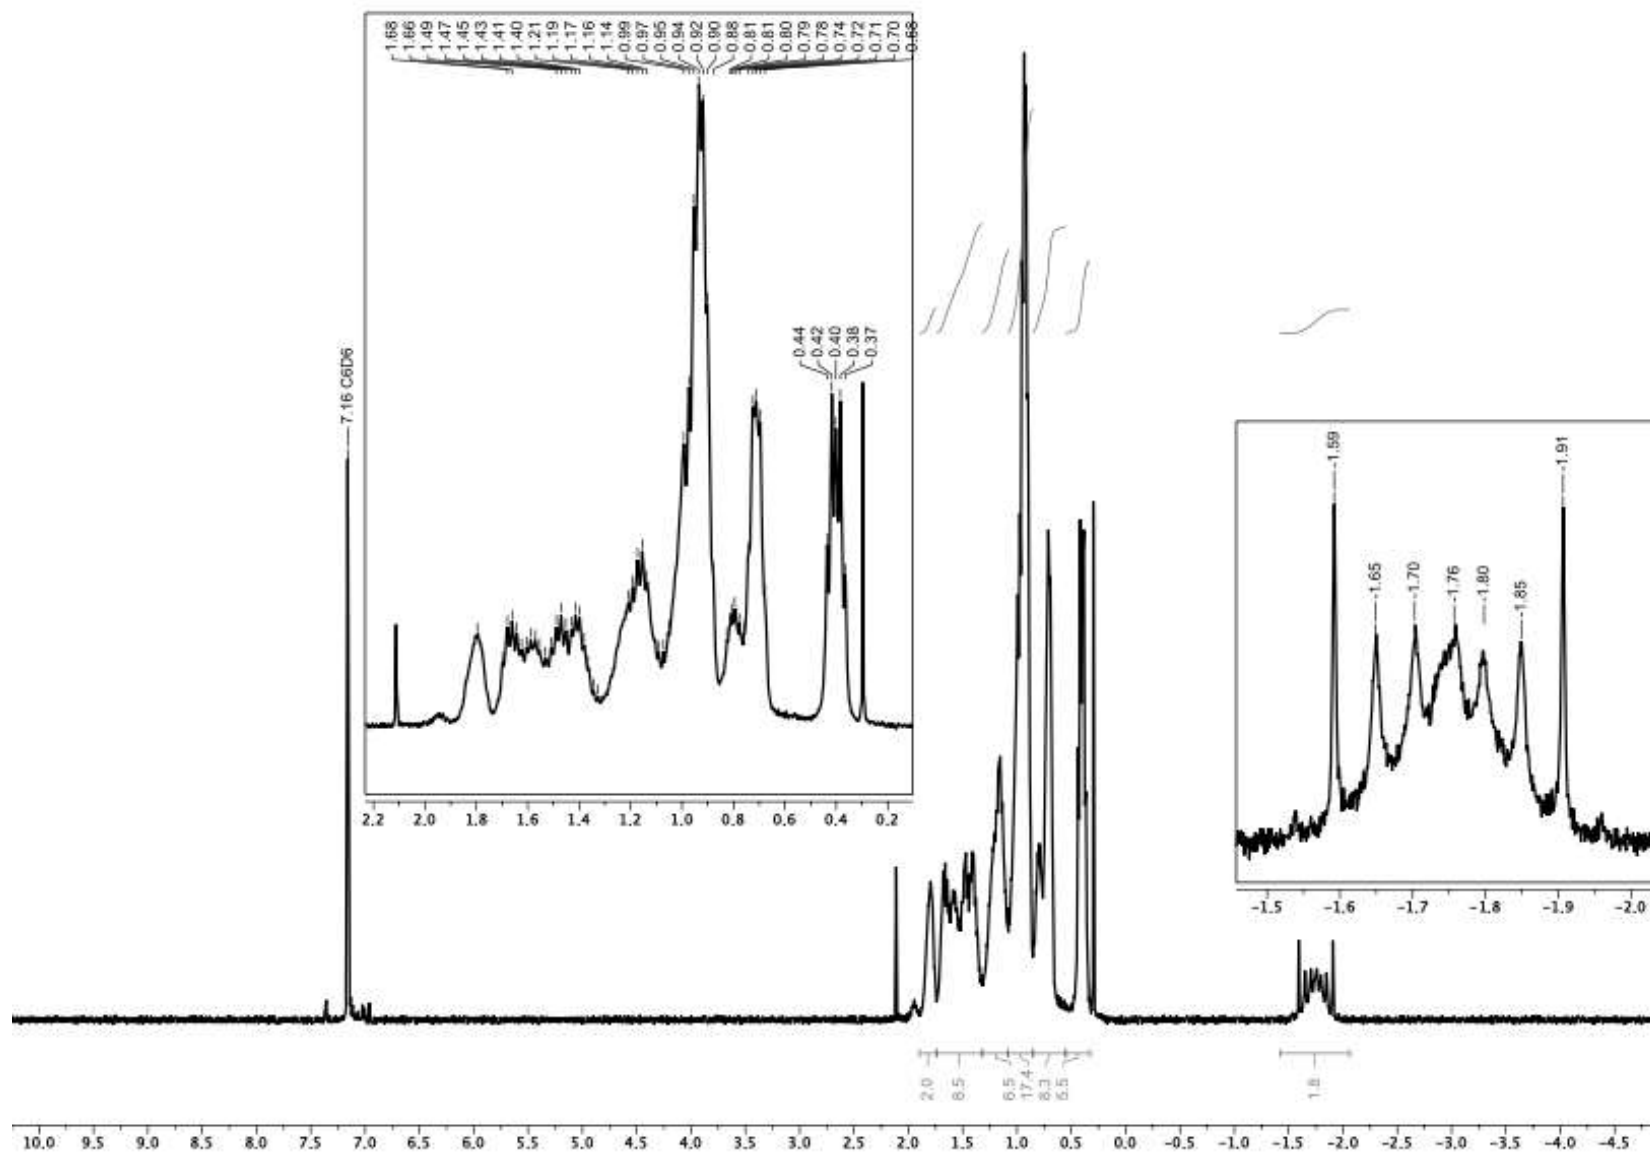

3.6.2 **Figure S27.**  $^{11}\text{B}$  NMR (128 MHz,  $\text{C}_6\text{D}_6$ ) of **10**.

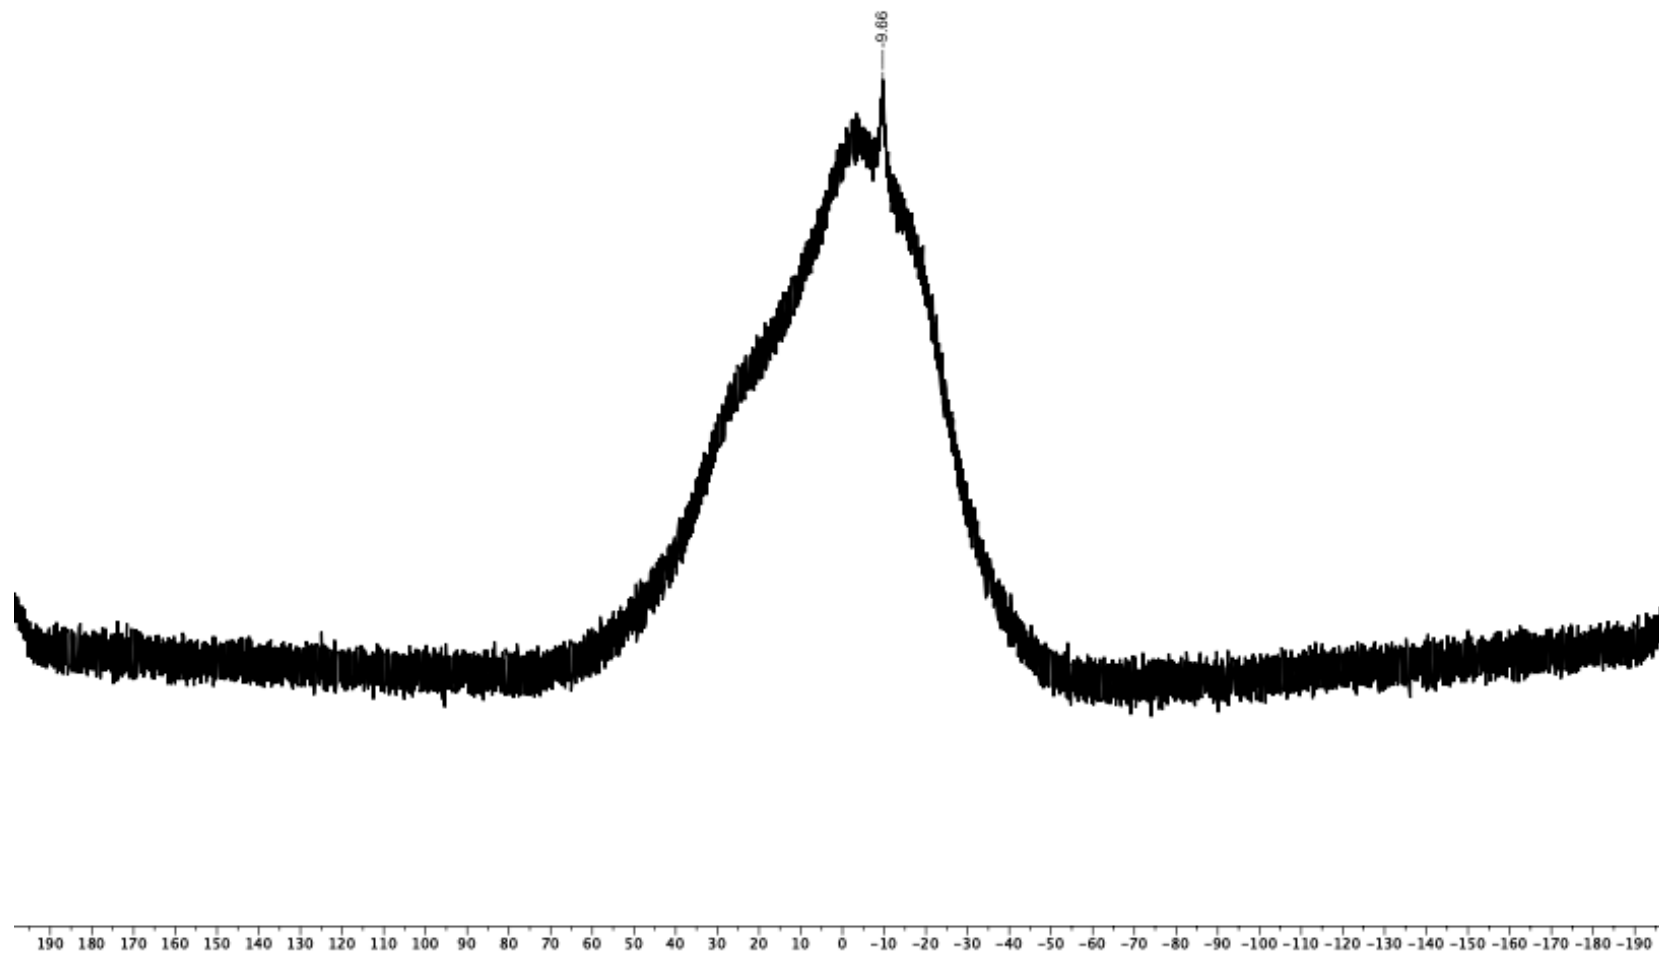

3.6.3 **Figure S28.**  $^{19}\text{F}$  NMR (376 MHz,  $\text{C}_6\text{D}_6$ ) of **10**.

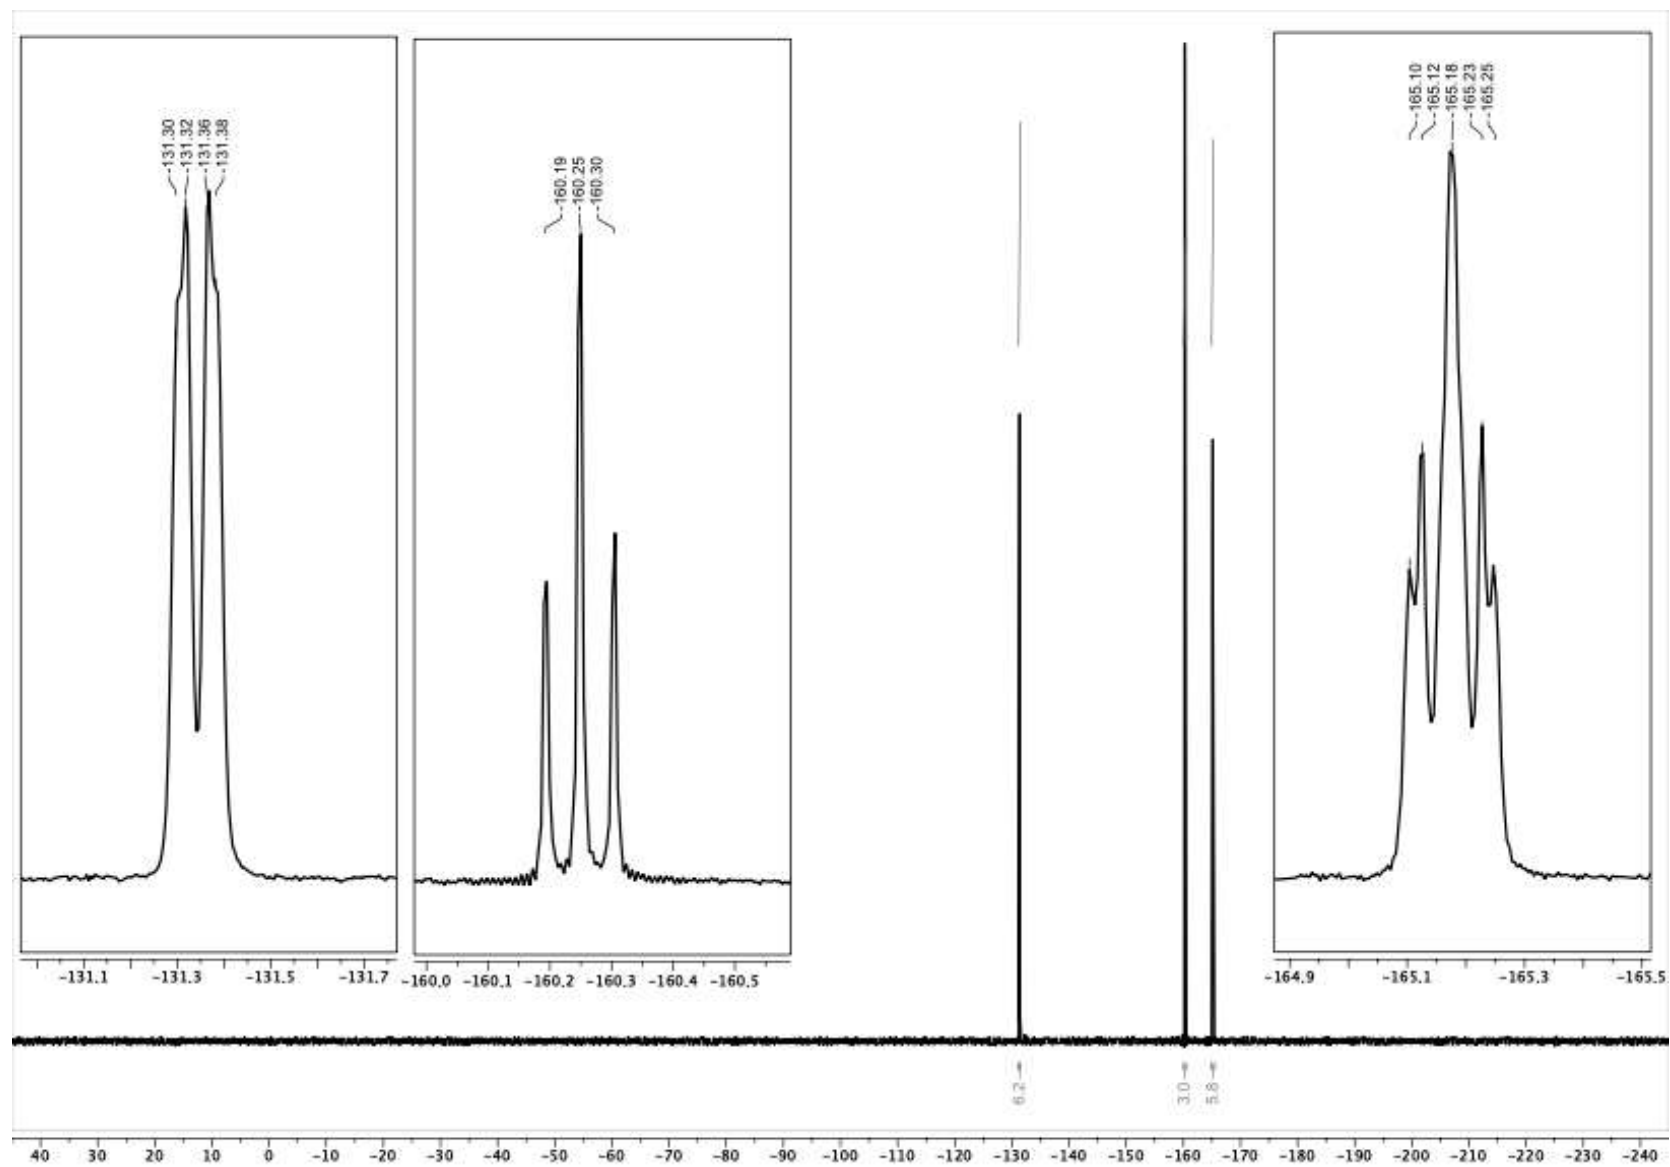

3.6.4 **Figure S29.**  $^{15}\text{N}$  INVGATED  $^1\text{H}$  NMR (41 MHz,  $\text{C}_6\text{D}_6$ ) of **10**.

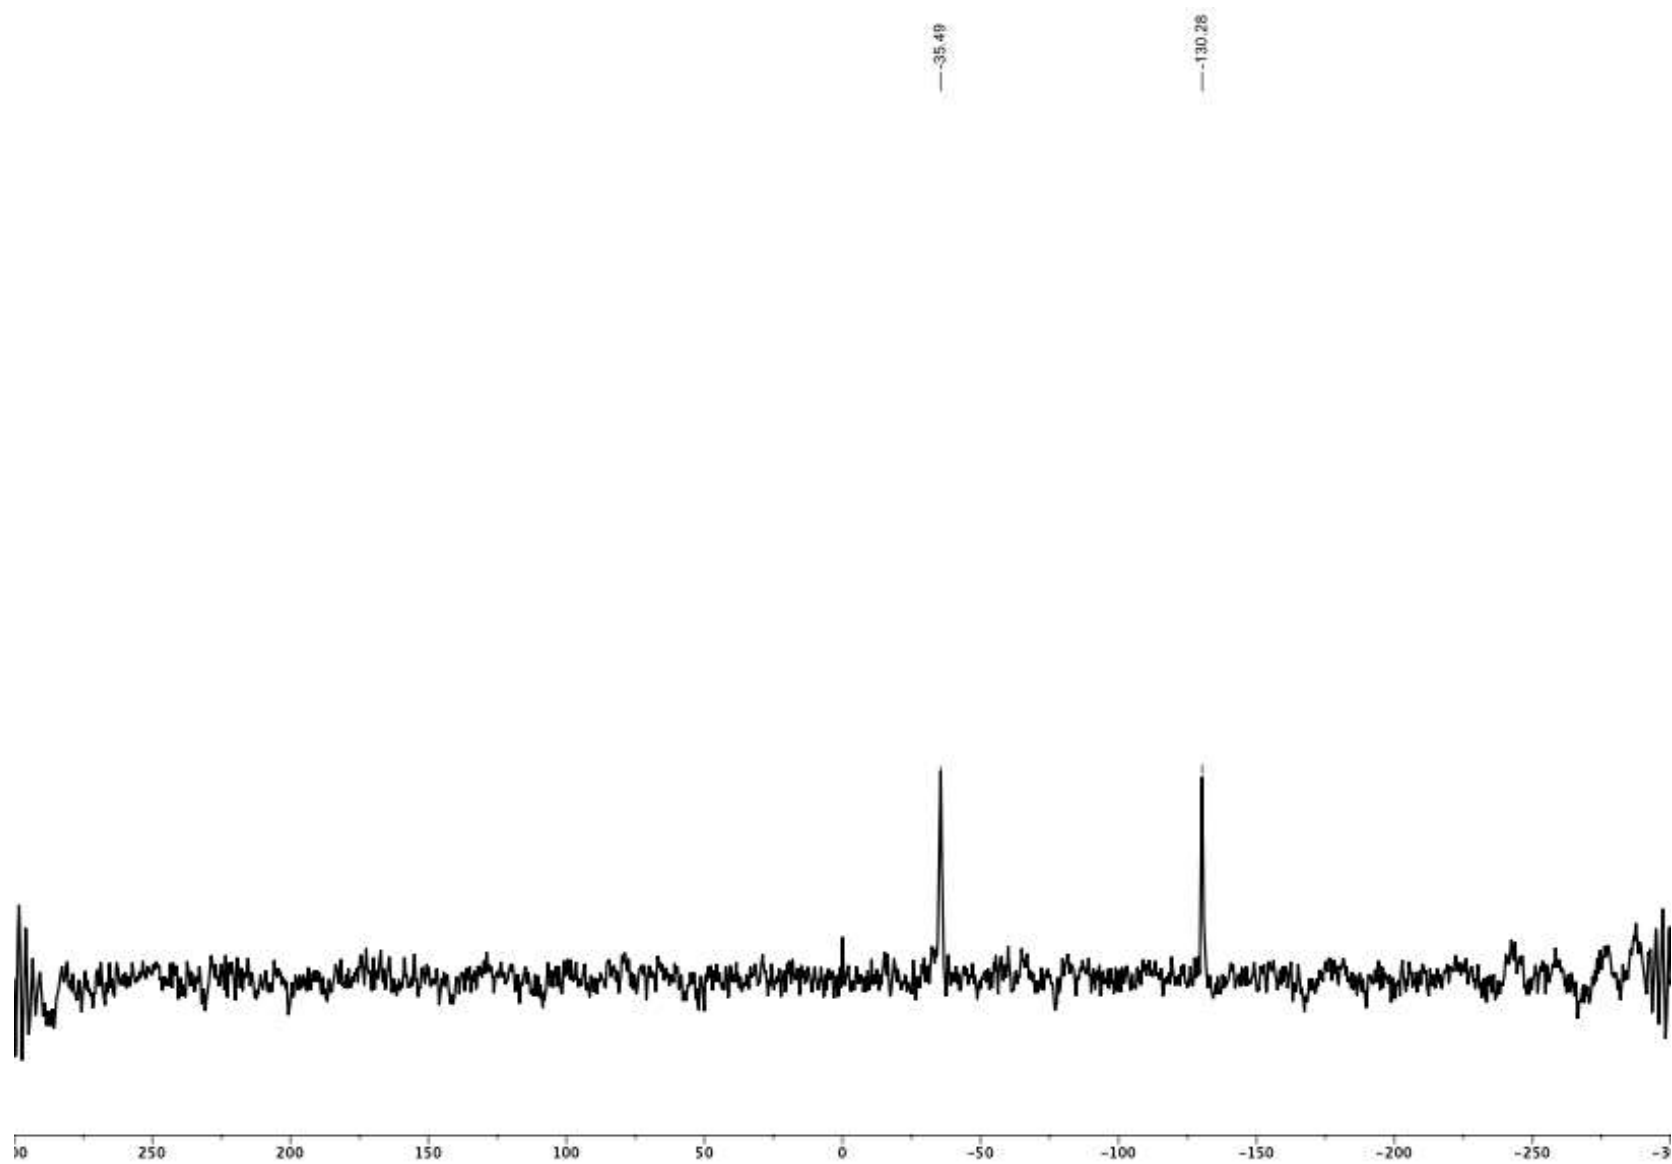

3.6.5 **Figure S30.**  $^{31}\text{P}\{^1\text{H}\}$  NMR (162 MHz,  $\text{C}_6\text{D}_6$ ) of **10**.

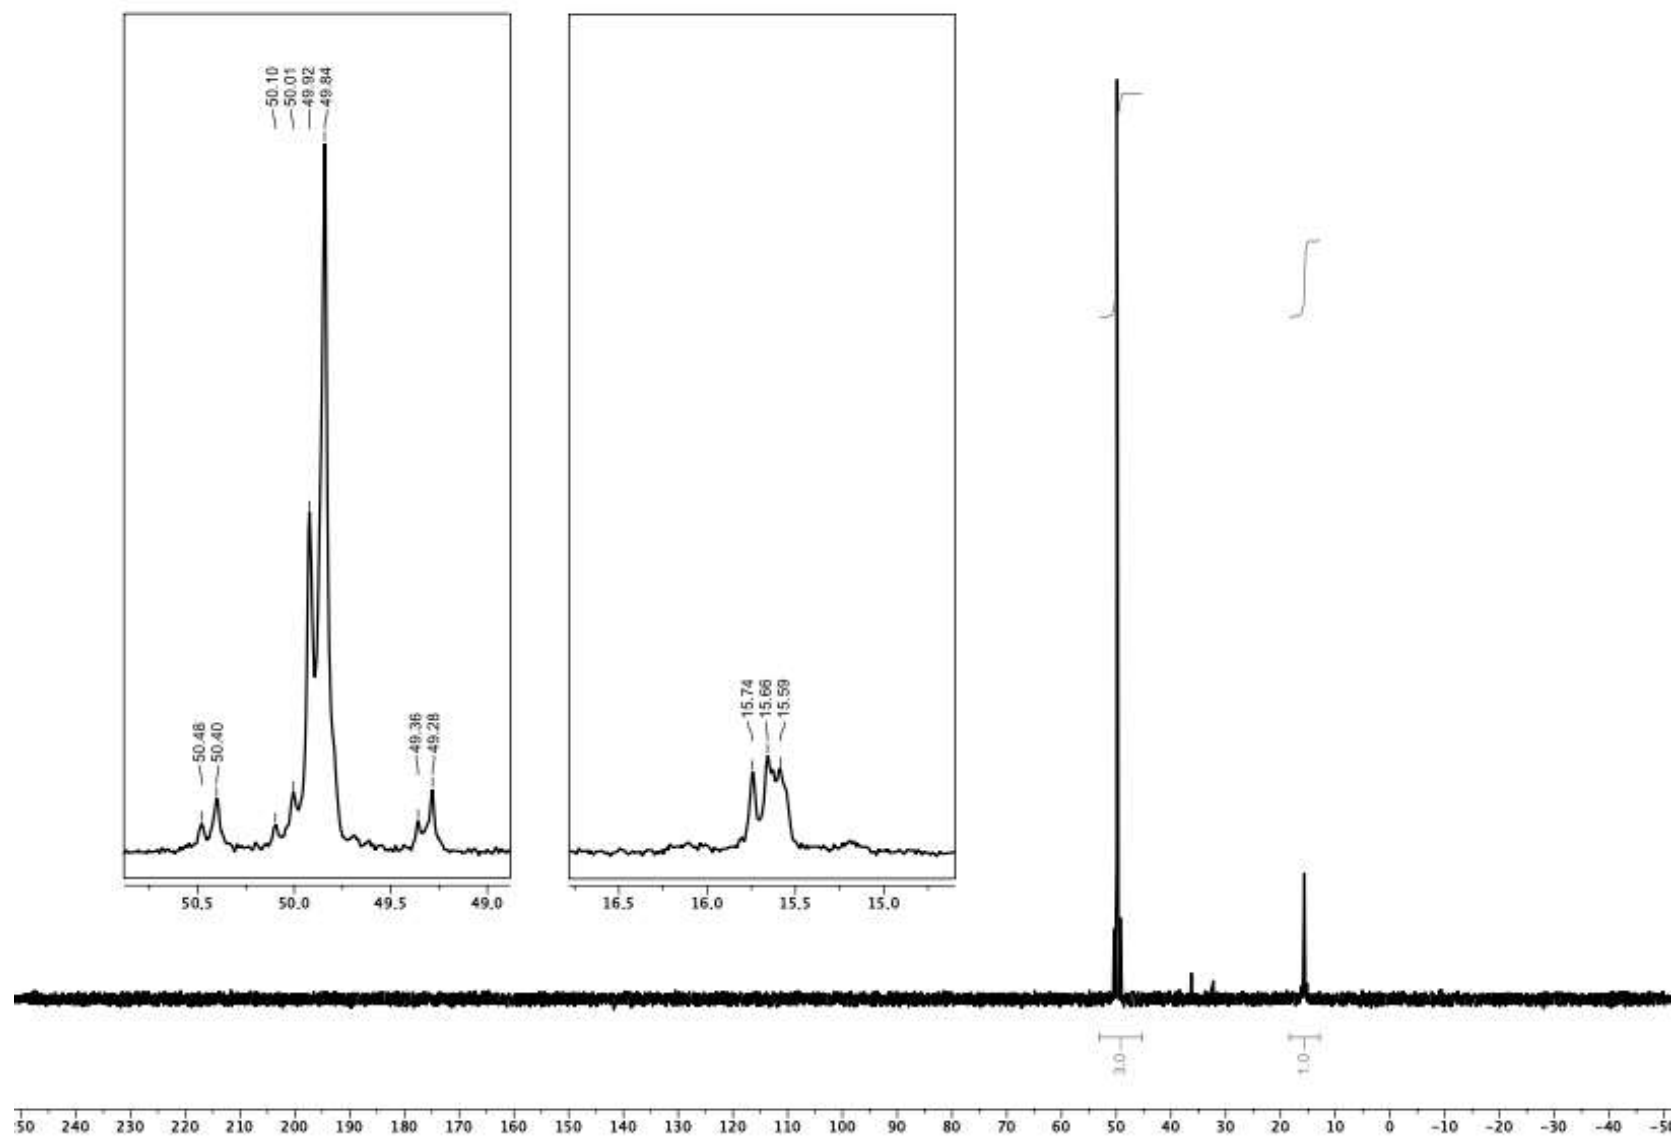

3.6.6 **Figure S31.** FT-IR (ATR) of 10.

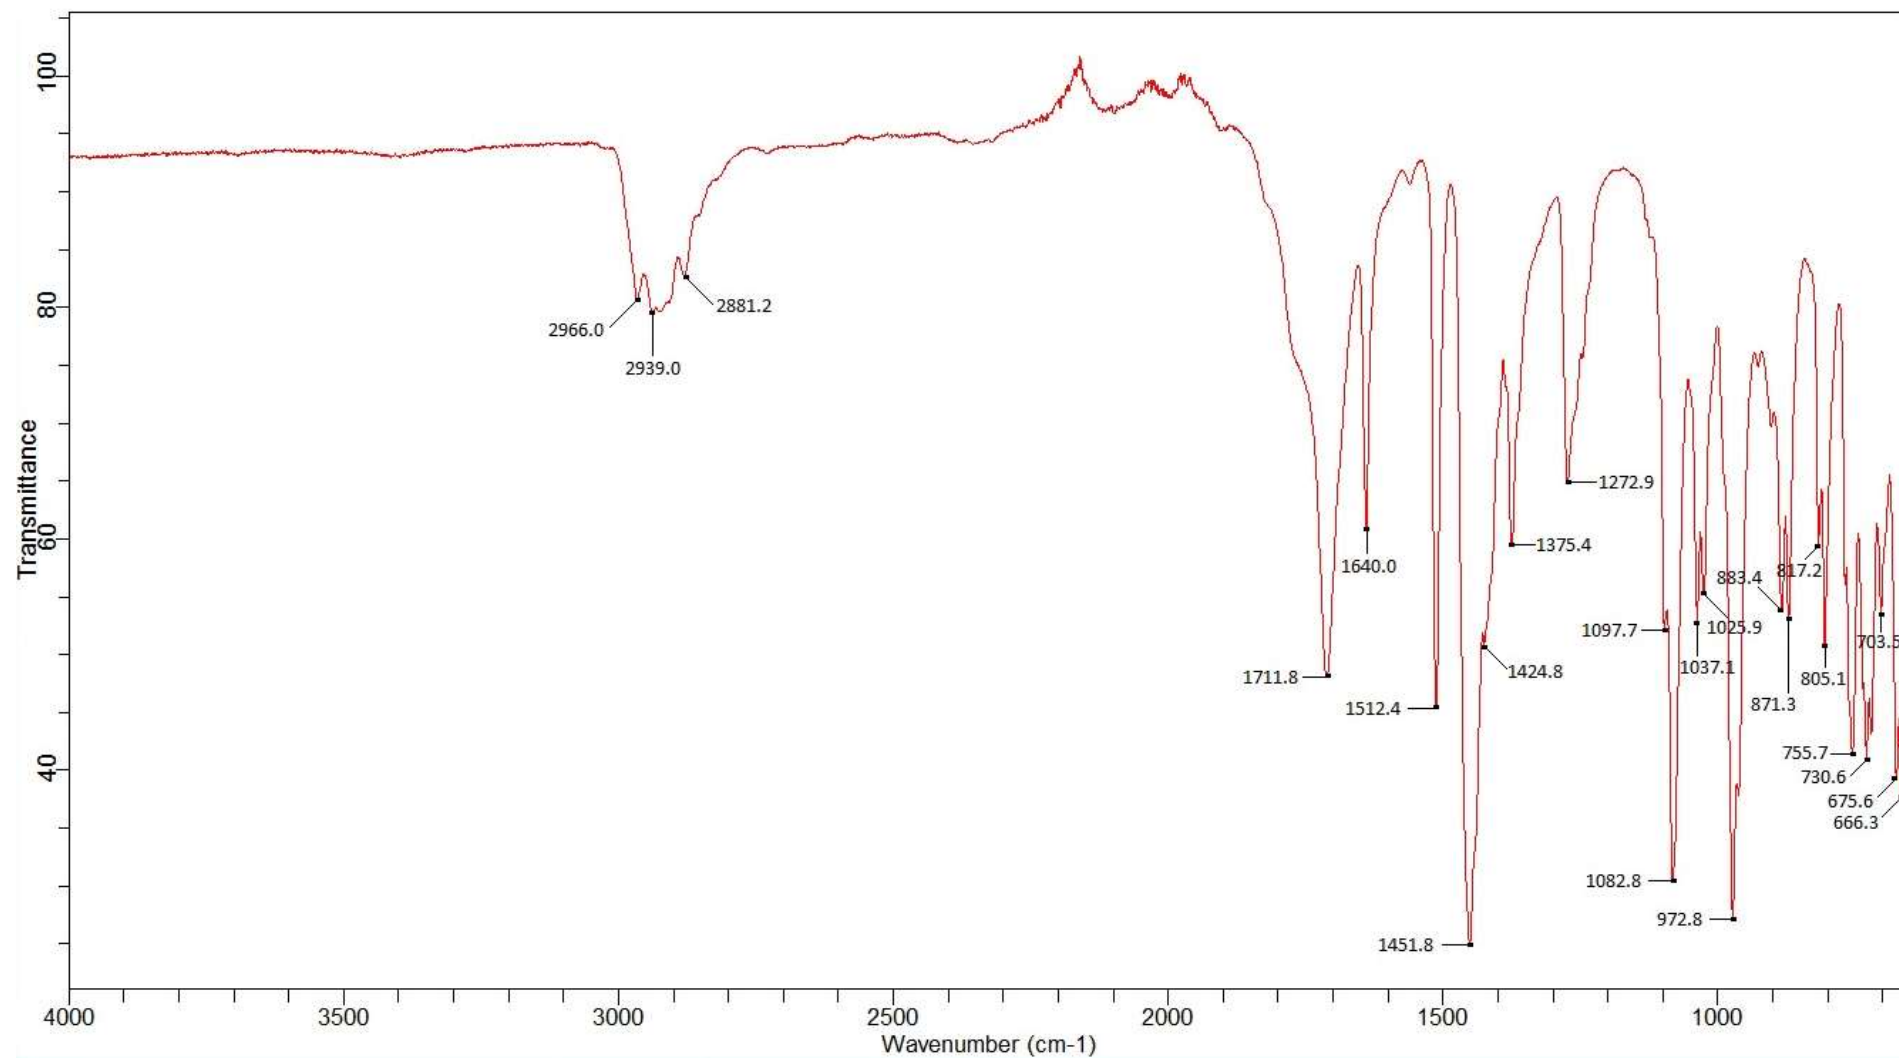

3.6.7 **Figure S32.** FT-IR (ATR) of <sup>15</sup>N-10.

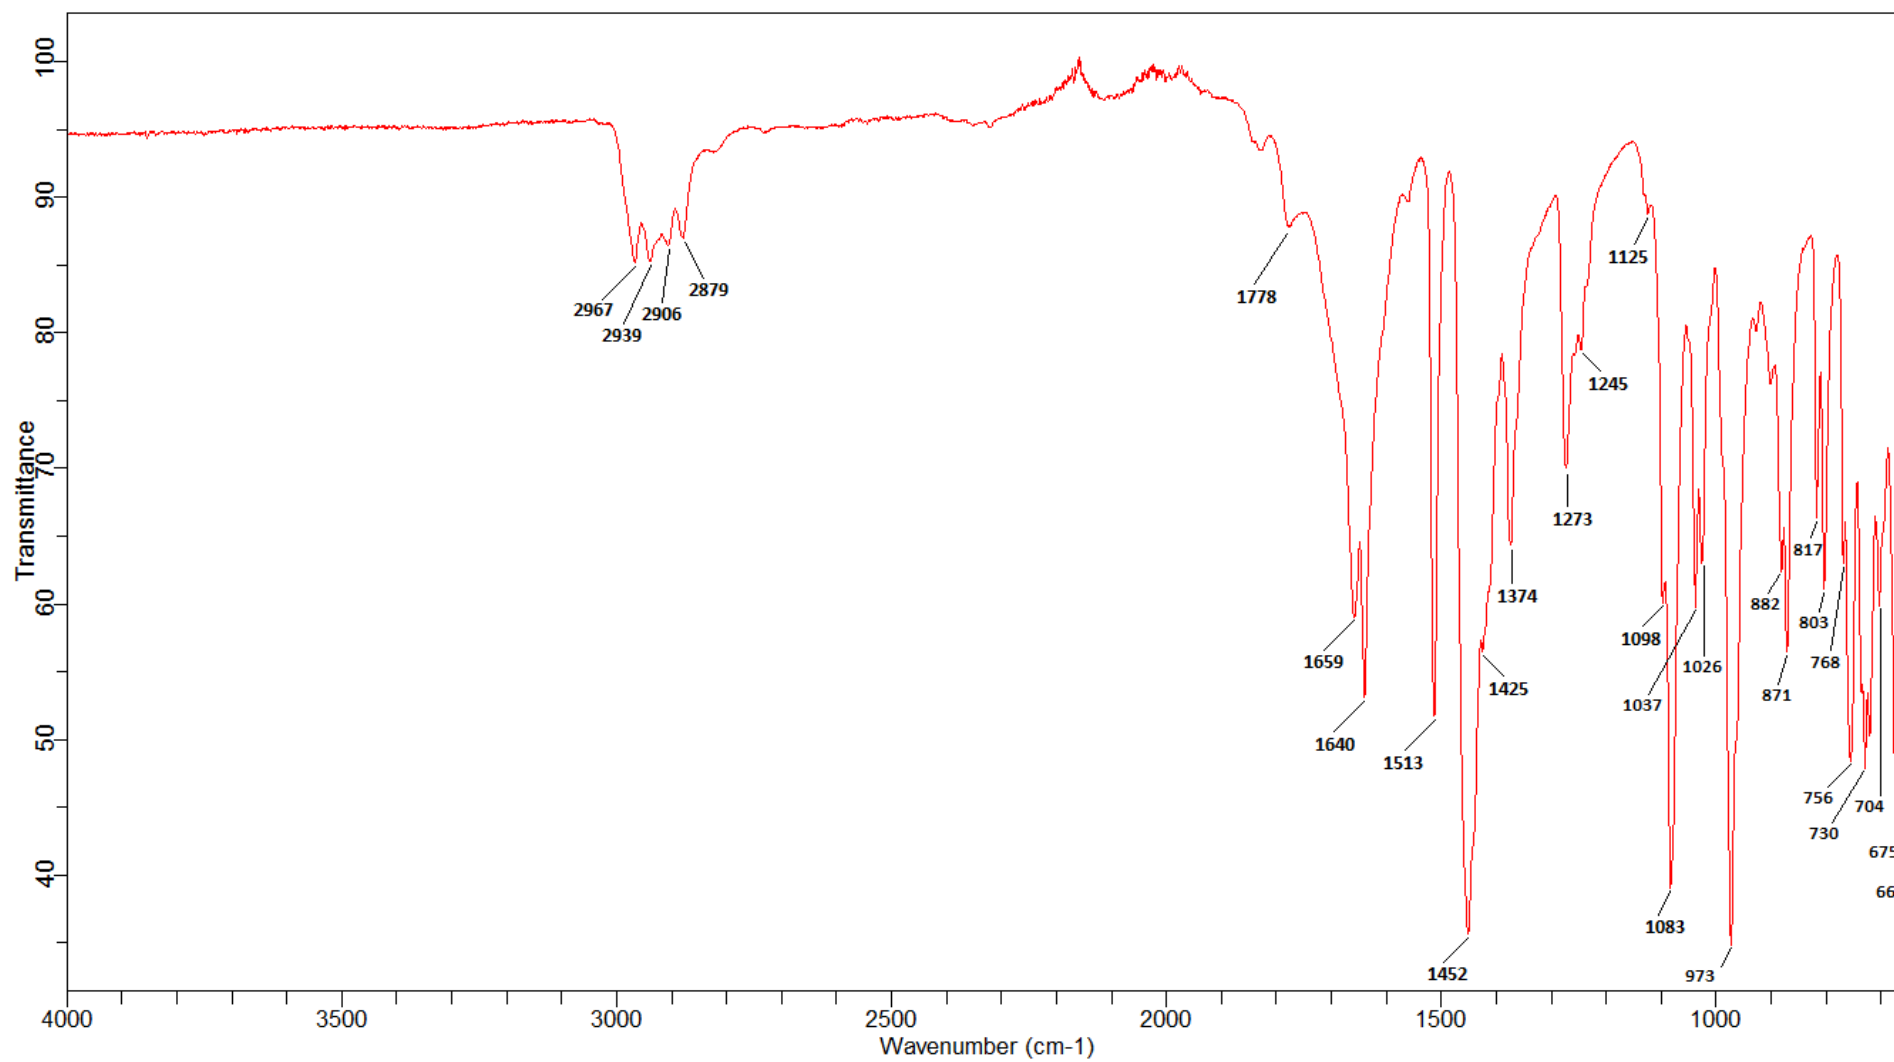

3.6.8 **Figure S33.** Raman spectra of **10**.

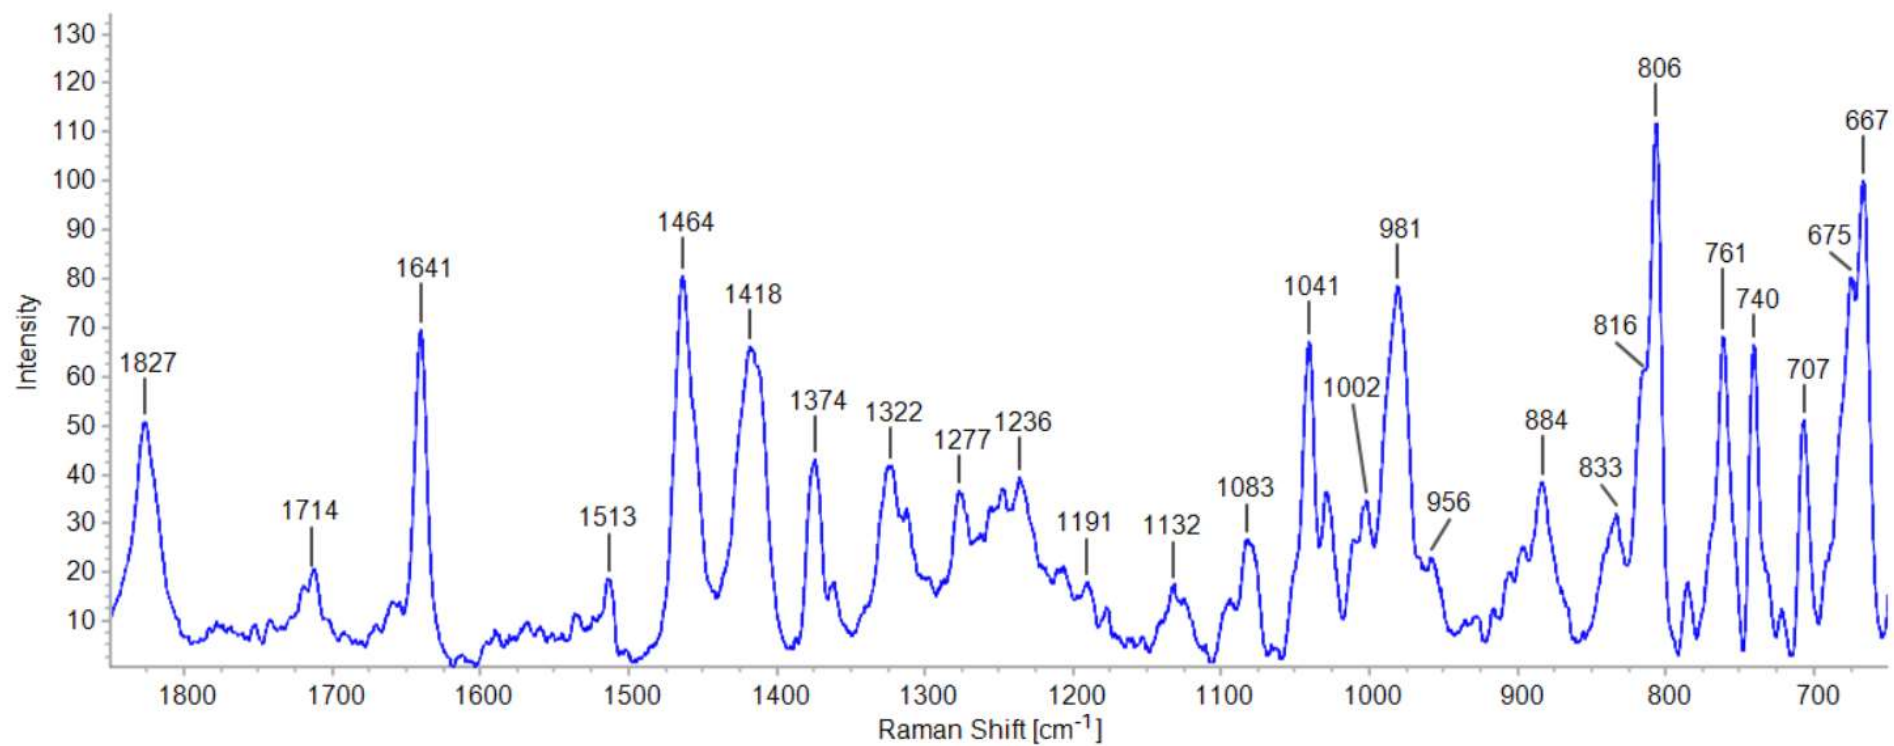



3.6.9 **Figure S34.** Raman spectra of  $^{15}\text{N-10}$

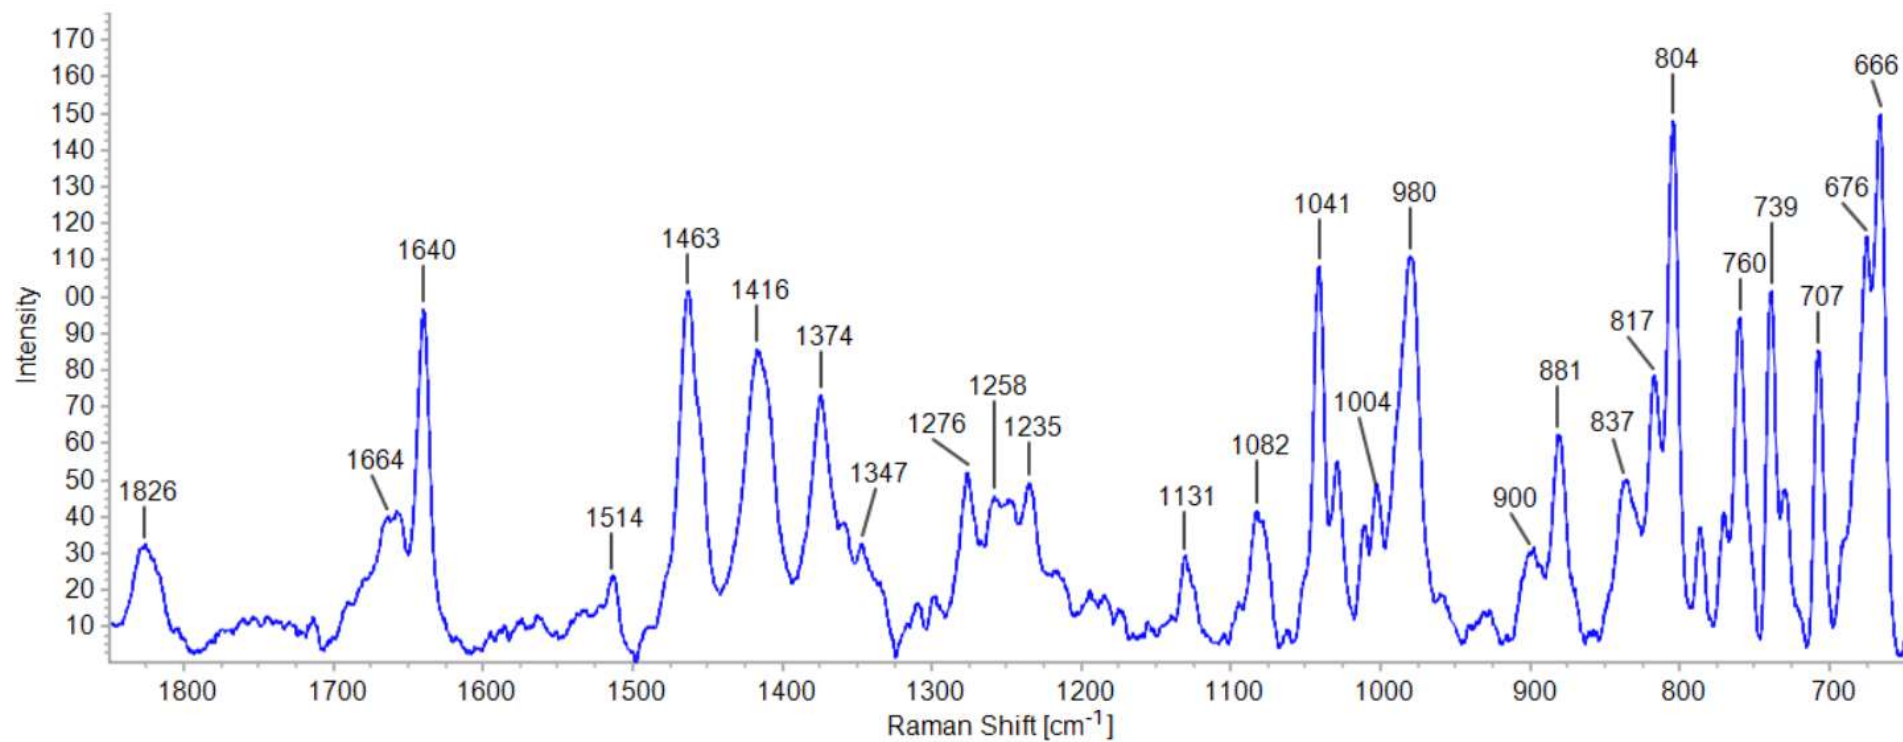

---

## 4 Crystallographic data

### 4.1 Data collection and refinement

Data for compounds **3**, **4**, **5**, **7** and **10** were collected at low temperature (100 K) on a Bruker Kappa Apex II diffractometer using a Mo-K $\alpha$  radiation ( $\lambda = 0.71073\text{\AA}$ ) micro-source and equipped with an Oxford Cryosystems Cryostream Cooler Device. The structures have been solved by Direct Methods and refined by means of least-squares procedures using the SHELXS97<sup>S4</sup> program included in the softwares package WinGX version 1.63<sup>S5</sup> or with the aid of the software package Crystal.<sup>S6</sup> The Atomic Scattering Factors were taken from International tables for X-Ray Crystallography.<sup>S7</sup> Hydrogen atoms were placed geometrically and refined using a riding model. All non-hydrogens atoms were anisotropically refined. Drawing of molecules in the following figures were performed with the program Mercury<sup>S8</sup> with 30% probability displacement ellipsoids for non-hydrogen atoms. The crystal structures have been deposited at the Cambridge Crystallographic Data Centre and allocated the deposition numbers CCDC 2115061-2115063, 2115066 and 2285830.

## 4.2 X-Ray diffraction analysis of 3.

**Figure S35.** X-ray crystal structure of 3, hydrogen atoms omitted for clarity. Ellipsoids at the 30% probability level.

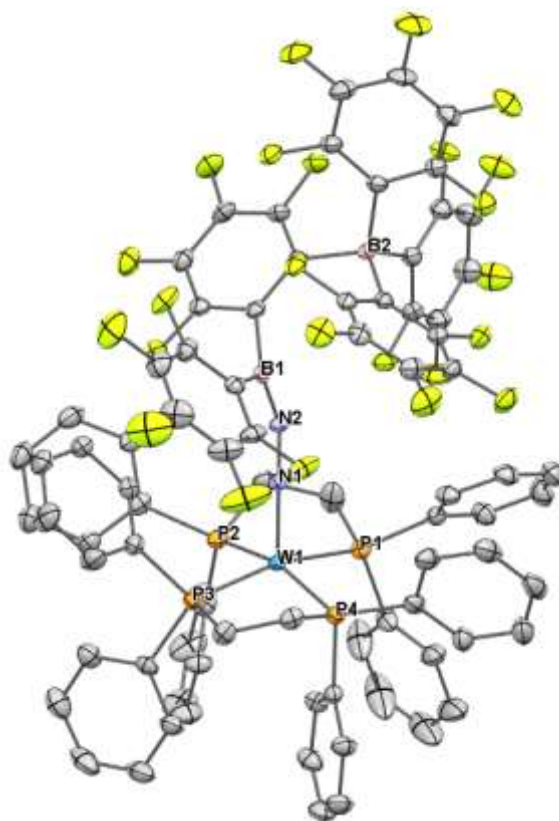

**Table S1.** Crystallographic data for 3.

|                                                                   |                                                                                                |
|-------------------------------------------------------------------|------------------------------------------------------------------------------------------------|
| Chemical formula                                                  | C <sub>82</sub> H <sub>48</sub> B <sub>2</sub> F <sub>24</sub> N <sub>2</sub> P <sub>4</sub> W |
| M <sub>r</sub>                                                    | 1846.57                                                                                        |
| Crystal system, space group                                       | Monoclinic, P2 <sub>1</sub> /n                                                                 |
| Temperature (K)                                                   | 200 K                                                                                          |
| a, b, c (Å)                                                       | 13.6255 (5), 28.1927 (11), 22.8261 (9)                                                         |
| β (°)                                                             | 101.761 (1)                                                                                    |
| V (Å <sup>3</sup> )                                               | 8584.3 (6)                                                                                     |
| Z                                                                 | 4                                                                                              |
| Radiation type                                                    | Mo Kα radiation, λ = 0.71073 Å                                                                 |
| μ (mm <sup>-1</sup> )                                             | 1.51                                                                                           |
| Crystal size (mm)                                                 | 0.15 × 0.12 × 0.02                                                                             |
| <b>Data collection</b>                                            |                                                                                                |
| Diffractometer                                                    | Bruker Kappa APEX II diffractometer                                                            |
| Absorption correction                                             | multi-scan DENZO/SCALEPACK (Otwinowski & Minor, 1997)                                          |
| T <sub>min</sub> , T <sub>max</sub>                               | 0.652, 0.746                                                                                   |
| No. of measured, independent and observed [I > 2σ(I)] reflections | 192193, 14618, 12352                                                                           |
| R <sub>int</sub>                                                  | 0.067                                                                                          |
| θ <sub>max</sub> (°)                                              | 24.7                                                                                           |
| <b>Refinement</b>                                                 |                                                                                                |
| R[F <sup>2</sup> > 2σ(F <sup>2</sup> )], wR(F <sup>2</sup> ), S   | 0.035, 0.093, 1.12                                                                             |
| No. of reflections                                                | 14618                                                                                          |
| No. of parameters                                                 | 1036                                                                                           |
| H-atom treatment                                                  | H-atom parameters constrained                                                                  |
| Δρ <sub>max</sub> , Δρ <sub>min</sub> (e Å <sup>-3</sup> )        | 1.87, -0.85                                                                                    |

### 4.3 X-Ray diffraction analysis of 4.

**Figure S36.** X-ray crystal structure of 4, hydrogen atoms omitted for clarity. Ellipsoids at the 30% probability level.

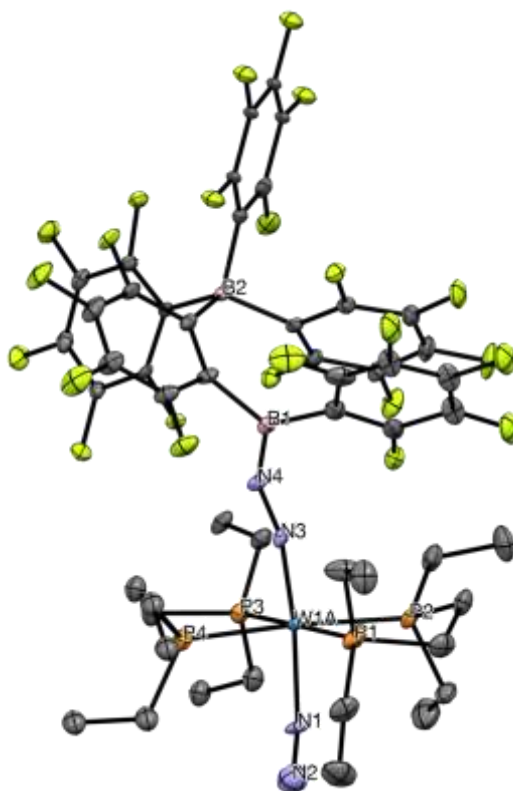

**Table S2.** Crystallographic data for 4.

|                                                                   |                                                                                                                                                                   |
|-------------------------------------------------------------------|-------------------------------------------------------------------------------------------------------------------------------------------------------------------|
| Chemical formula                                                  | C <sub>50</sub> H <sub>48</sub> B <sub>2</sub> F <sub>24</sub> N <sub>4</sub> P <sub>4</sub> W·C <sub>7</sub> H <sub>8</sub> ·0.5(C <sub>6</sub> H <sub>6</sub> ) |
| M <sub>r</sub>                                                    | 1621.46                                                                                                                                                           |
| Crystal system, space group                                       | Monoclinic, P2 <sub>1</sub> /n                                                                                                                                    |
| Temperature (K)                                                   | 110 K                                                                                                                                                             |
| a, b, c (Å)                                                       | 12.833 (3), 24.785 (5), 19.899 (4)                                                                                                                                |
| β (°)                                                             | 91.015 (7)                                                                                                                                                        |
| V (Å <sup>3</sup> )                                               | 6328 (2)                                                                                                                                                          |
| Z                                                                 | 4                                                                                                                                                                 |
| Radiation type                                                    | Mo Kα radiation, λ = 0.71073 Å                                                                                                                                    |
| μ (mm <sup>-1</sup> )                                             | 2.04                                                                                                                                                              |
| Crystal size (mm)                                                 | 0.17 × 0.12 × 0.04                                                                                                                                                |
| <b>Data collection</b>                                            |                                                                                                                                                                   |
| Diffractometer                                                    | Bruker Kappa APEX II diffractometer                                                                                                                               |
| Absorption correction                                             | multi-scan DENZO/SCALEPACK (Otwinowski & Minor, 1997)                                                                                                             |
| T <sub>min</sub> , T <sub>max</sub>                               | 0.669, 0.746                                                                                                                                                      |
| No. of measured, independent and observed [I > 2σ(I)] reflections | 123400, 12924, 10277                                                                                                                                              |
| R <sub>int</sub>                                                  | 0.100                                                                                                                                                             |
| θ <sub>max</sub> (°)                                              | 26.4                                                                                                                                                              |
| <b>Refinement</b>                                                 |                                                                                                                                                                   |
| R[F <sup>2</sup> > 2σ(F <sup>2</sup> )], wR(F <sup>2</sup> ), S   | 0.063, 0.144, 1.13                                                                                                                                                |
| No. of reflections                                                | 12923                                                                                                                                                             |
| No. of parameters                                                 | 829                                                                                                                                                               |
| H-atom treatment                                                  | H-atom parameters constrained                                                                                                                                     |
| Δρ <sub>max</sub> , Δρ <sub>min</sub> (e Å <sup>-3</sup> )        | 2.12, -1.83                                                                                                                                                       |

#### 4.4 X-Ray diffraction analysis of 5.

**Figure S37.** X-ray crystal structure of 5, hydrogen atoms omitted for clarity. Ellipsoids at the 30% probability level.

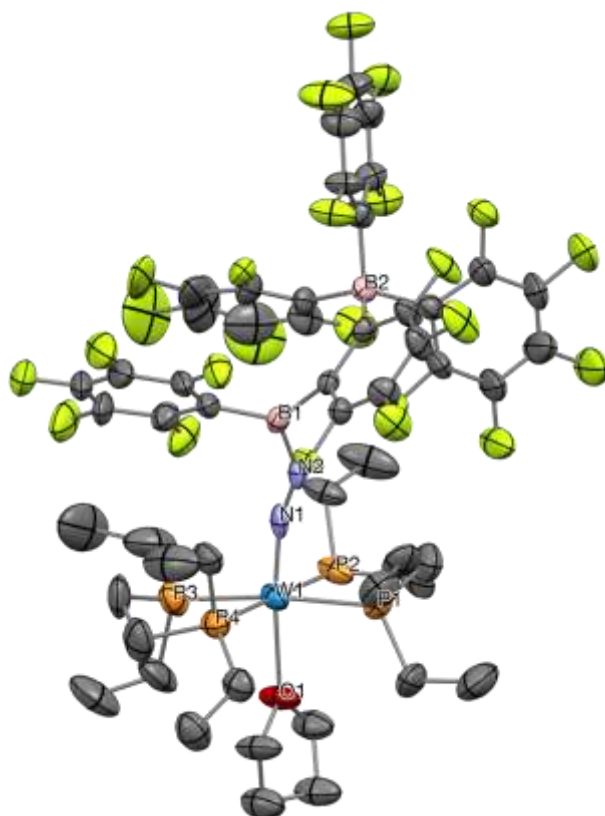

**Table S3.** Crystallographic data for 4.

|                                                                   |                                                                                                 |
|-------------------------------------------------------------------|-------------------------------------------------------------------------------------------------|
| Chemical formula                                                  | C <sub>54</sub> H <sub>56</sub> B <sub>2</sub> F <sub>24</sub> N <sub>2</sub> OP <sub>4</sub> W |
| M <sub>r</sub>                                                    | 1534.27                                                                                         |
| Crystal system, space group                                       | Monoclinic, P2 <sub>1</sub> /n                                                                  |
| Temperature (K)                                                   | 133 K                                                                                           |
| a, b, c (Å)                                                       | 15.1504(9), 23.4318(15), 19.2226(11)                                                            |
| β (°)                                                             | 93.953(2)                                                                                       |
| V (Å <sup>3</sup> )                                               | 6807.8(7)                                                                                       |
| Z                                                                 | 4                                                                                               |
| Radiation type                                                    | Mo Kα radiation, λ = 0.71073 Å                                                                  |
| μ (mm <sup>-1</sup> )                                             | 1.91                                                                                            |
| Crystal size (mm)                                                 |                                                                                                 |
| <b>Data collection</b>                                            |                                                                                                 |
| Diffractometer                                                    | Bruker Kappa APEX II diffractometer                                                             |
| Absorption correction                                             | multi-scan DENZO/SCALEPACK (Otwinowski & Minor, 1997)                                           |
| T <sub>min</sub> , T <sub>max</sub>                               |                                                                                                 |
| No. of measured, independent and observed [I > 2σ(I)] reflections | 99634, 7122, 5695                                                                               |
| R <sub>int</sub>                                                  | 0.107                                                                                           |
| θ <sub>max</sub> (°)                                              | 20.8                                                                                            |
| <b>Refinement</b>                                                 |                                                                                                 |
| R[F <sup>2</sup> > 2σ(F <sup>2</sup> )], wR(F <sup>2</sup> ), S   | 0.082, 0.220, 1.10                                                                              |
| No. of reflections                                                | 7122                                                                                            |
| No. of parameters                                                 | 796                                                                                             |
| H-atom treatment                                                  | H atoms parameters constrained                                                                  |
| Δρ <sub>max</sub> (e Å <sup>-3</sup> )                            | 0.032                                                                                           |

#### 4.5 X-Ray diffraction analysis of 7.

**Figure S38.** X-ray crystal structure of 7, hydrogen atoms except those bound to tungsten omitted for clarity. Ellipsoids at the 30% probability level.

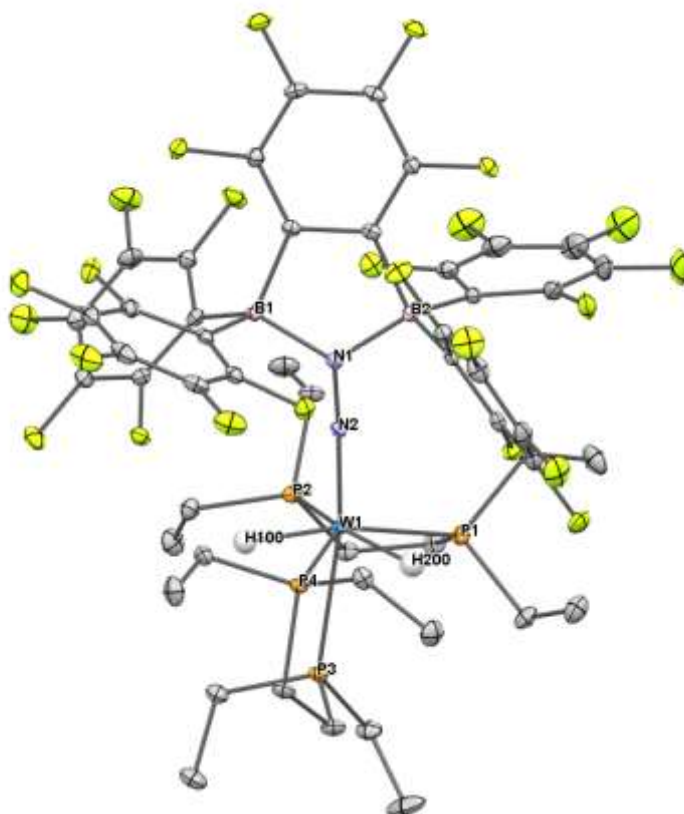

**Table S4.** Crystallographic data for 7.

|                                                                   |                                                                                                |
|-------------------------------------------------------------------|------------------------------------------------------------------------------------------------|
| Chemical formula                                                  | C <sub>50</sub> H <sub>50</sub> B <sub>2</sub> F <sub>24</sub> N <sub>2</sub> P <sub>4</sub> W |
| M <sub>r</sub>                                                    | 1464.27                                                                                        |
| Crystal system, space group                                       | Monoclinic, P2 <sub>1</sub> /c                                                                 |
| Temperature (K)                                                   | 133 K                                                                                          |
| a, b, c (Å)                                                       | 20.1462 (11), 11.8225 (6), 22.9963 (12)                                                        |
| β (°)                                                             | 92.163 (2)                                                                                     |
| V (Å <sup>3</sup> )                                               | 5473.3 (5)                                                                                     |
| Z                                                                 | 4                                                                                              |
| Radiation type                                                    | Mo Kα radiation, λ = 0.71073 Å                                                                 |
| μ (mm <sup>-1</sup> )                                             | 2.35                                                                                           |
| Crystal size (mm)                                                 | 0.18 × 0.15 × 0.03                                                                             |
| <b>Data collection</b>                                            |                                                                                                |
| Diffractometer                                                    | Bruker Kappa APEX II diffractometer                                                            |
| Absorption correction                                             | multi-scan DENZO/SCALEPACK (Otwinowski & Minor, 1997)                                          |
| T <sub>min</sub> , T <sub>max</sub>                               | 0.633, 0.747                                                                                   |
| No. of measured, independent and observed [I > 2σ(I)] reflections | 235655, 11190, 10270                                                                           |
| R <sub>int</sub>                                                  | 0.064                                                                                          |
| θ <sub>max</sub> (°)                                              | 26.4                                                                                           |
| <b>Refinement</b>                                                 |                                                                                                |
| R[F <sup>2</sup> > 2σ(F <sup>2</sup> )], wR(F <sup>2</sup> ), S   | 0.022, 0.054, 1.09                                                                             |
| No. of reflections                                                | 11190                                                                                          |
| No. of parameters                                                 | 764                                                                                            |
| H-atom treatment                                                  | mixture of independent and constrained refinement                                              |
| Δρ <sub>max</sub> , Δρ <sub>min</sub> (e Å <sup>-3</sup> )        | 1.45, -0.58                                                                                    |

## 4.6 X-Ray diffraction analysis of 10.

**Figure S39.** X-ray crystal structure of **10**, hydrogen atoms except those bound to tungsten omitted for clarity. Ellipsoids at the 30% probability level.

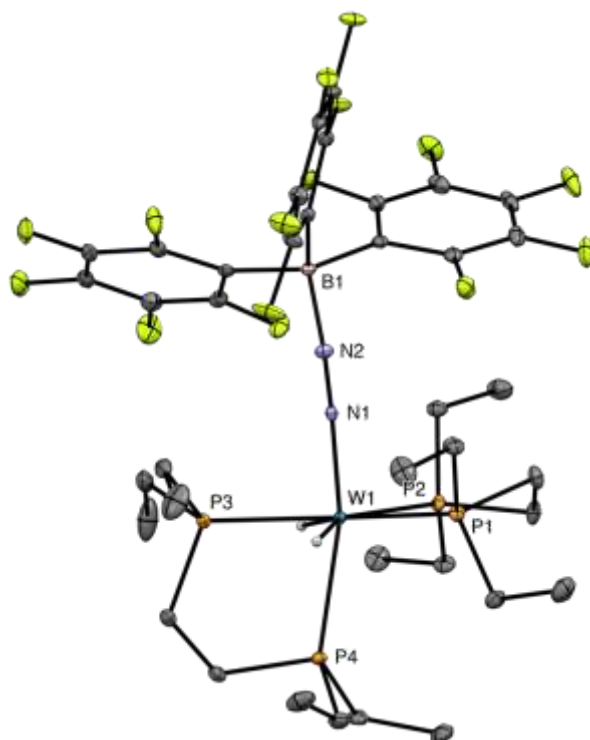

**Table S5.** Crystallographic data for **7**.

|                                                          |                                                                                                                   |
|----------------------------------------------------------|-------------------------------------------------------------------------------------------------------------------|
| $C_{38}H_{50}BF_{15}N_2P_4W$                             |                                                                                                                   |
| $M_r = 1138.35$                                          | $D_x = 1.712 \text{ Mg m}^{-3}$                                                                                   |
| Monoclinic, $P2_1/c$                                     |                                                                                                                   |
| Hall symbol: $-P 2_1/c$                                  | Mo $K\alpha$ radiation, $\lambda = 0.71073 \text{ \AA}$                                                           |
| $a = 10.96920 (3) \text{ \AA}$                           | Cell parameters from 9782 reflections                                                                             |
| $b = 20.06390 (4) \text{ \AA}$                           | $\theta = 3\text{--}28^\circ$                                                                                     |
| $c = 20.47910 (4) \text{ \AA}$                           | $\mu = 2.86 \text{ mm}^{-1}$                                                                                      |
| $\beta = 101.510 (3)^\circ$                              | $T = 110 \text{ K}$                                                                                               |
| $V = 4416.50 (5) \text{ \AA}^3$                          | Block, yellow                                                                                                     |
| $Z = 4$                                                  | $0.15 \times 0.10 \times 0.04 \text{ mm}$                                                                         |
| $F(000) = 2264$                                          |                                                                                                                   |
| <b>Data Collection</b>                                   |                                                                                                                   |
| Bruker Kappa Apex2 diffractometer                        | 9836 reflections with $I > 2.0\sigma(I)$                                                                          |
| Radiation source: Mo micro focus                         | $R_{\text{int}} = 0.056$                                                                                          |
| Graphite monochromator                                   | $\theta_{\text{max}} = 28.4^\circ$ , $\theta_{\text{min}} = 1.4^\circ$                                            |
| $\phi$ & $\omega$ scans                                  | $h = -14 \quad 14$                                                                                                |
| Absorption correction: multi-scan SADABS (Siemens, 1996) | $k = -26 \quad 26$                                                                                                |
| $T_{\text{min}} = 0.83$ , $T_{\text{max}} = 0.89$        | $l = -27 \quad 26$                                                                                                |
| 95890 measured reflections                               | Standard reflections: 0                                                                                           |
| 11037 independent reflections                            |                                                                                                                   |
| <b>Refinement</b>                                        |                                                                                                                   |
| Refinement on $F^2$                                      |                                                                                                                   |
| Least-squares matrix: full                               | Hydrogen site location: difference Fourier map                                                                    |
| $R[F^2 > 2\sigma(F^2)] = 0.020$                          | H atoms treated by a mixture of independent and constrained refinement                                            |
| $wR(F_2) = 0.047$                                        | Method = Modified Sheldrick $w = 1/[\sigma^2(F^2) + (0.01P)^2 + 5.38P]$ , where $P = (\max(F_o^2, 0) + 2F_c^2)/3$ |
| $S = 0.99$                                               | $(\Delta/\sigma)_{\text{max}} = 0.005$                                                                            |
| 11030 reflections                                        | $\Delta\rho_{\text{max}} = 0.67 \text{ e \AA}^{-3}$                                                               |
| 557 parameters                                           | $\Delta\rho_{\text{min}} = -0.54 \text{ e \AA}^{-3}$                                                              |
| 0 restraints                                             | Extinction correction: None                                                                                       |

## 5 DFT Calculations

### 5.1 Methods

#### 5.1.1 Thermodynamics of H<sub>2</sub> oxidative addition and NMR chemical shifts

DFT calculations employing the B3PW91 functional<sup>S9</sup> were performed with the Gaussian16 series of programs, B.01 version.<sup>S10</sup> The tungsten atoms were represented by the relativistic effective core potential (RECP) from the Stuttgart group and their associated basis set,<sup>S11,12</sup> augmented by polarization functions ( $\alpha_f = 0.823$ ,  $W$ ;  $\alpha_d = 0.387$  P).<sup>S13</sup> The remaining atoms (C, B, N, F, Si, O, H) were represented by 6-31G(d,p) basis sets.<sup>S14</sup> Full optimizations of geometry without any constraint were performed. Calculations of harmonic vibrational frequencies were performed to determine the nature of each extremum. The contributions to the Gibbs free energy were taken at  $T = 298$  K and with  $P = 1$  atm within the harmonic oscillator and rigid rotator approximations. To compute chemical shielding tensors, the gauge including atomic orbital (GIAO) method has been adopted. Chemical shifts are calculated as  $\delta = \sigma^{\text{TMS}} - \sigma^{\text{complex}}$  where  $\sigma^{\text{TMS}}$  and  $\sigma^{\text{complex}}$  are the isotropic chemical shieldings of H atoms in tetramethylsilane (TMS) and in a transition metal complex, respectively. The average calculated isotropic shielding in TMS is 31.7 ppm for <sup>1</sup>H.<sup>S15</sup>

#### 5.1.2 IR frequencies calculations, Kohn-Sham orbitals and NBO analysis of **7** and **10**

The DFT calculations were carried out with the Gaussian16 series of programs, B.01 version,<sup>S10</sup> using the B3PW91 functional in combination with the 6-31G(d,p) basis set and Grimme's DFT-D3 London-dispersion correction with Becke-Johnson damping (D3BJ).<sup>S16</sup> Calculated Infra-red values were corrected with a scaling factor = 0.958. Natural Bond Orbital<sup>S17</sup> analyses – NBO – (Wiberg indexes, NPA charges, pNBO, and pNLMO) were performed with the NBO program version 6.0.<sup>S18</sup>

### 5.2 Thermodynamics of H<sub>2</sub> oxidative addition

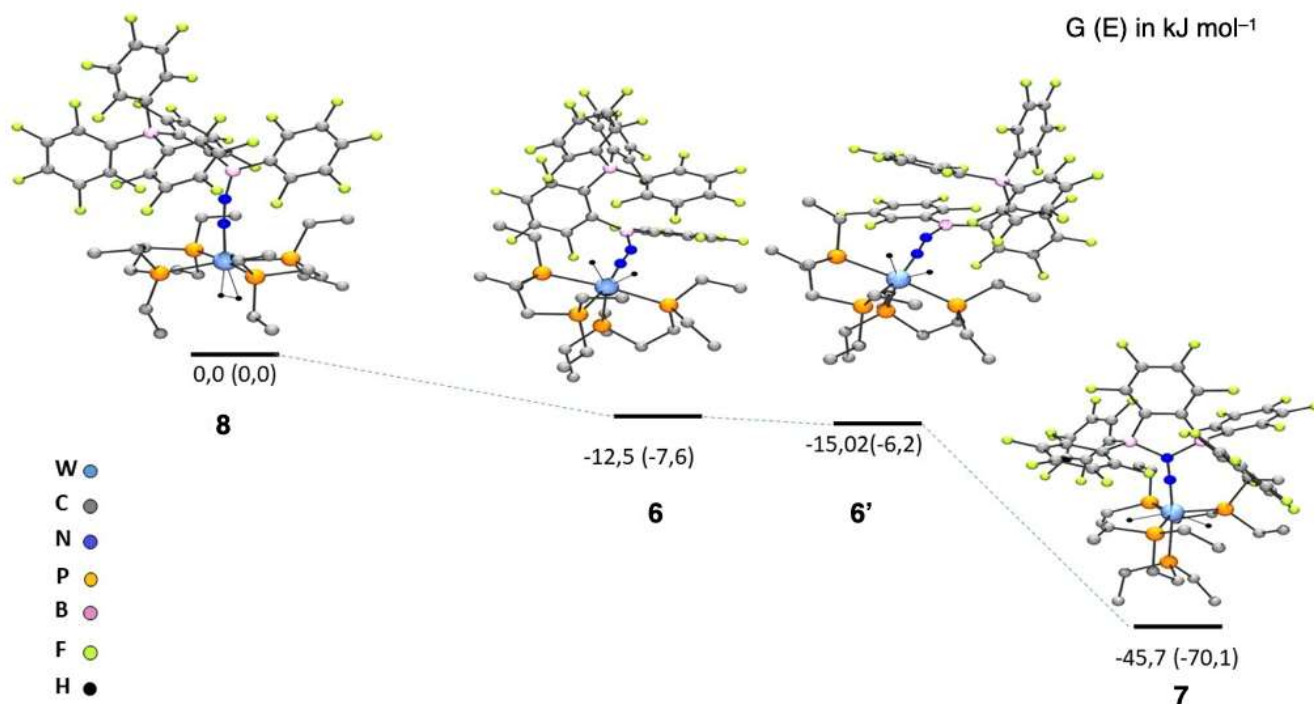

**Figure S40.** Possible intermediates in the  $5 + \text{H}_2 \rightarrow 7$  reaction and their relative energies.



### 5.3 Chemical shift estimations

The structures of the literature-known tungsten-hydride complexes **A-F**<sup>[S19]</sup> have been optimized using their X-ray diffraction structures as the starting point.

**Chart S1.** Known W–H species used as basis for <sup>1</sup>H-NMR chemical shift prediction of the W-bound protons in **6** and **7**.

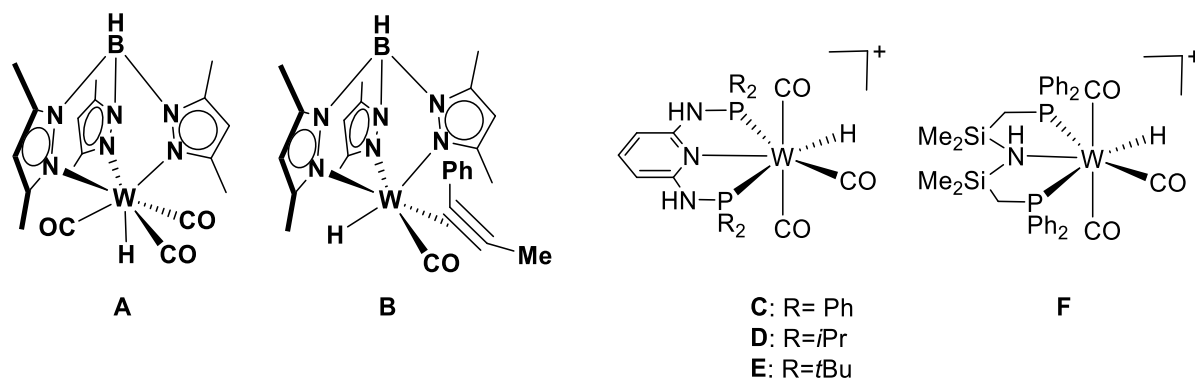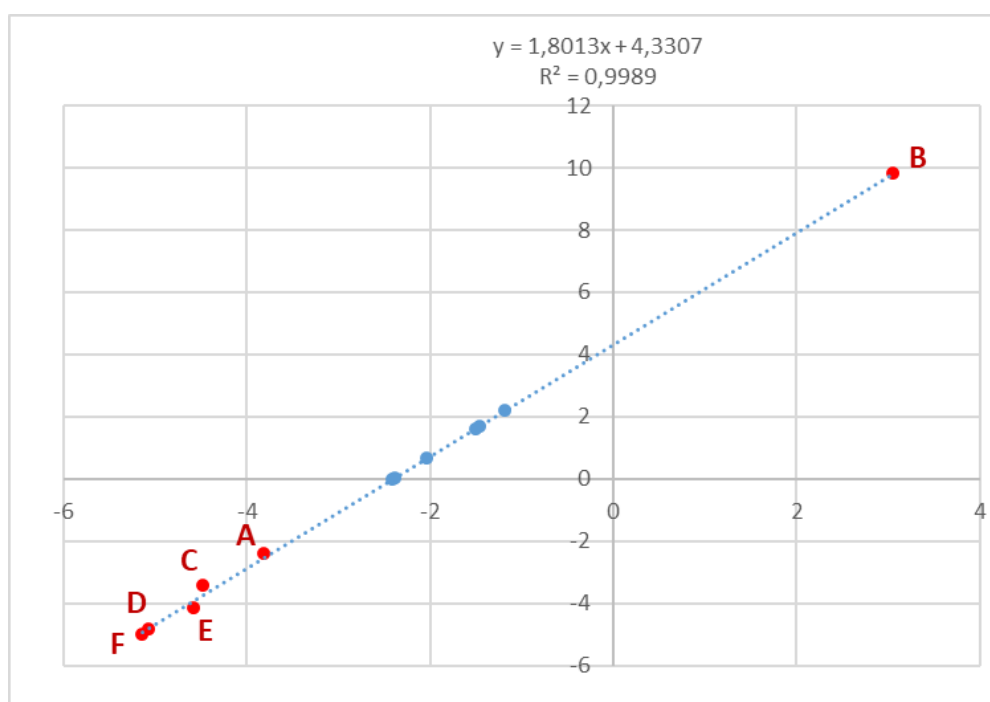

**Plot S1.** Red series: computed W–H chemical shifts plotted against the experimental values for complexes **A–F**. Blue dotted line: linear regression of the red series. Blue series: computed W–H chemical shifts plotted against the estimated values (extracted from the linear regression curve equation  $1.8013 \times \delta_{\text{calc}} + 4.3307$ ) for complexes **6–7**.

**Table S6.** Isotropic chemical shieldings tensor ( $\sigma$ ) and chemical shift ( $\delta$ ) values:  $\delta_{\text{est}}$  (ppm) are calculated using the equation  $\delta_{\text{est}} = 1.8013 \times \delta_{\text{calc}} + 4.3307$ ;  $\delta_{\text{calc}} = \sigma^{\text{TMS}} - \sigma^{\text{complex}} = 31.7 - \sigma^{\text{complex}}$ .

|           | $\sigma^{\text{complex}}$ (Ha) | $\delta_{\text{calc}}$ (ppm) | $\delta_{\text{est}}$ (ppm) | $\sigma^{\text{complex}}$ (Hb) | $\delta_{\text{calc}}$ (ppm) | $\delta_{\text{est}}$ (ppm) |
|-----------|--------------------------------|------------------------------|-----------------------------|--------------------------------|------------------------------|-----------------------------|
| <b>6</b>  | 33.16 (H84)                    | -1.46                        | 1.70                        | 34.08 (H85)                    | -2.38                        | 0.04                        |
| <b>6'</b> | 33.74 (H85)                    | -2.04                        | 0.66                        | 34.11 (H84)                    | -2.41                        | -0.01                       |
| <b>7</b>  | 32.89 (H71)                    | -1.19                        | 2.19                        | 33.21 (H85)                    | -1.51                        | 1.61                        |
|           | $\sigma^{\text{complex}}$ (Ha) | $\delta_{\text{calc}}$ (ppm) | $\delta_{\text{exp}}$ (ppm) |                                |                              |                             |
| <b>A</b>  | 35.51 (H52)                    | -3.81                        | -2.42                       |                                |                              |                             |
| <b>B</b>  | 28.65 (H65)                    | +3.05                        | +9.8                        |                                |                              |                             |
| <b>C</b>  | 36.18 (H2)                     | -4.48                        | -4.83                       |                                |                              |                             |
| <b>D</b>  | 36.76 (H4)                     | -5.06                        | -4.16                       |                                |                              |                             |
| <b>E</b>  | 36.27 (H4)                     | -4.57                        | -3.43                       |                                |                              |                             |
| <b>F</b>  | 36.84 (H80)                    | -5.14                        | -5.02                       |                                |                              |                             |

## 5.4 Coordinates of optimized geometries used for chemical shift estimations (B3PW91, 6-31G)

### 5.4.1 Compound **8** ( $E = -4582.518956$ Ha)

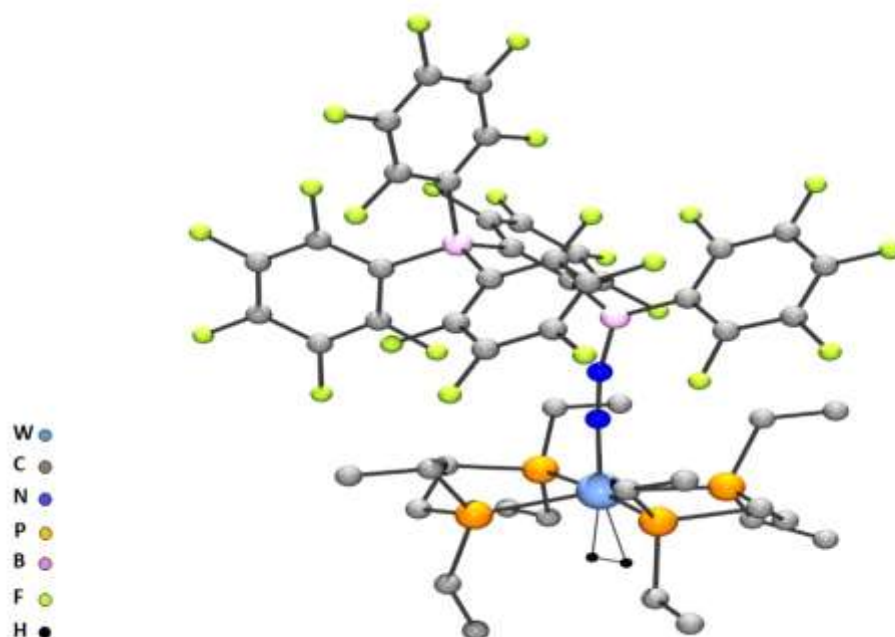

Figure S41. Optimized structure for **8**, hydrogen atoms except those bound to tungsten omitted for clarity.

|   |           |           |           |   |           |           |           |   |           |           |           |
|---|-----------|-----------|-----------|---|-----------|-----------|-----------|---|-----------|-----------|-----------|
| C | 7.438127  | 1.220960  | -0.901398 | C | -2.775888 | 2.641389  | -3.878797 | F | 5.482309  | -5.135809 | -0.202034 |
| C | 6.788351  | 0.380421  | -1.797758 | C | -5.612969 | 0.412994  | -2.882283 | F | 5.702278  | -2.524824 | -0.121150 |
| C | 5.544109  | -0.135820 | -1.459346 | C | -6.046824 | 1.285915  | -4.057163 | C | 2.509657  | 0.252405  | -1.253477 |
| C | 4.884115  | 0.120737  | -0.255087 | P | -2.878722 | -2.630745 | -1.496978 | C | 1.899707  | -0.345483 | -2.359072 |
| C | 5.570493  | 0.982625  | 0.598529  | C | -1.288970 | -2.431845 | -2.447807 | C | 1.289838  | 0.363670  | -3.390781 |
| C | 6.822040  | 1.523097  | 0.304465  | C | -0.761764 | -3.626019 | -3.238756 | C | 1.302717  | 1.751087  | -3.381133 |
| B | 3.361695  | -0.489513 | -0.033375 | C | -4.044772 | -3.280937 | -2.810288 | C | 1.931785  | 2.403099  | -2.330782 |
| C | 2.702335  | -0.194951 | 1.459420  | C | -5.478914 | -3.540586 | -2.357580 | C | 2.513896  | 1.651691  | -1.312852 |
| C | 1.470296  | 0.437584  | 1.767346  | C | -2.631957 | -4.162831 | -0.435767 | F | 0.685243  | -0.286449 | -4.397861 |
| C | 1.022552  | 0.442256  | 3.088413  | C | -2.038941 | -3.788126 | 0.915082  | F | 1.869793  | -1.681455 | -2.512372 |
| C | 1.705803  | -0.141650 | 4.140306  | P | -2.954941 | -2.353254 | 1.697874  | F | 0.715096  | 2.444260  | -4.362824 |
| C | 2.919569  | -0.750698 | 3.857844  | C | -1.798861 | -1.966503 | 3.110554  | F | 1.958619  | 3.740870  | -2.296129 |
| C | 3.380361  | -0.758826 | 2.546023  | C | -2.392626 | -1.137003 | 4.244096  | F | 3.123639  | 2.362950  | -0.349563 |
| F | -0.155719 | 1.059288  | 3.392337  | C | -4.421467 | -3.172379 | 2.534176  | H | -6.983586 | 0.909090  | -4.481957 |
| B | 0.440014  | 1.216527  | 0.841216  | C | -4.138610 | -4.335593 | 3.481986  | H | -5.353146 | -0.933871 | -0.204456 |
| N | -0.668024 | 0.520371  | 0.342958  | C | 0.424359  | 2.796854  | 0.703615  | H | -6.073834 | -3.944894 | -3.183083 |
| N | -1.738200 | 0.045514  | 0.123635  | C | -0.429436 | 3.471904  | -0.174641 | H | -6.416758 | 0.346525  | -2.137791 |
| W | -3.453187 | -0.650986 | -0.061625 | C | -0.508025 | 4.851694  | -0.283970 | H | -5.432098 | -0.612541 | -3.221878 |
| P | -4.484499 | 1.205278  | 1.241024  | C | 0.312311  | 5.639803  | 0.515422  | H | -6.220553 | 2.324893  | -3.761529 |
| C | -3.244869 | 2.304914  | 2.099503  | C | 1.189386  | 5.025787  | 1.402299  | H | -5.302892 | 1.284191  | -4.858322 |
| C | -3.749364 | 3.421566  | 3.008811  | C | 1.238694  | 3.635613  | 1.481819  | H | -5.971455 | -2.625326 | -2.016149 |
| F | 1.210477  | -0.126914 | 5.385633  | F | -1.250154 | 2.777165  | -0.989308 | H | -4.024261 | -2.550972 | -3.628093 |
| F | 3.622245  | -1.326780 | 4.836817  | F | -1.364530 | 5.417366  | -1.141382 | H | -7.558025 | 1.465749  | 3.595258  |
| F | 4.563862  | -1.369130 | 2.360174  | F | 0.253493  | 6.965040  | 0.435530  | H | -5.090875 | -3.491992 | 1.725699  |
| F | 4.971514  | -0.945755 | -2.372323 | F | 2.102622  | 3.136030  | 2.359849  | H | -5.069222 | -4.688341 | 3.939296  |
| F | 5.043874  | 1.370497  | 1.771678  | F | 1.975672  | 5.773889  | 2.173896  | H | -7.482073 | 2.085759  | 1.948251  |
| F | 7.363631  | 0.079376  | -2.968789 | C | 3.339195  | -2.154409 | -0.126307 | H | -3.690547 | -5.187789 | 2.963043  |
| F | 7.427332  | 2.344086  | 1.171543  | C | 2.127400  | -2.842350 | -0.075186 | H | -4.945889 | -2.365236 | 3.058655  |
| F | 8.635275  | 1.733868  | -1.199955 | C | 1.994804  | -4.222741 | -0.119114 | H | -5.525475 | -4.269419 | -1.541897 |
| C | -5.805064 | 0.804043  | 2.514478  | C | 3.131883  | -5.017016 | -0.169216 | H | -6.344591 | 1.953414  | -0.149491 |
| C | -6.876662 | 1.848644  | 2.827854  | C | 4.370410  | -4.394699 | -0.175062 | H | -3.616668 | -4.630164 | -0.314571 |
| C | -5.362130 | 2.390426  | 0.068446  | C | 4.451782  | -3.001221 | -0.144782 | H | -3.603357 | -4.203703 | -3.202877 |
| C | -4.556664 | 2.569053  | -1.215720 | F | 0.777725  | -4.803540 | -0.116335 | H | -6.278486 | -0.117252 | 2.155715  |
| P | -4.074225 | 0.891646  | -1.916632 | F | 3.029287  | -6.348435 | -0.206042 | H | -6.453152 | 2.782833  | 3.202291  |
| C | -2.799010 | 1.253390  | -3.238359 | F | 0.962028  | -2.148656 | 0.002936  | H | -3.464649 | -4.048670 | 4.294353  |

|   |           |           |           |   |           |           |           |   |           |           |           |
|---|-----------|-----------|-----------|---|-----------|-----------|-----------|---|-----------|-----------|-----------|
| H | -2.941688 | 0.473745  | -3.997166 | H | -3.621829 | 3.100625  | -1.016880 | H | -0.546029 | -2.112112 | -1.714310 |
| H | -5.112279 | 3.157098  | -1.953370 | H | -1.836378 | 1.047327  | -2.763717 | H | 0.153055  | -3.322470 | -3.755017 |
| H | -1.995124 | -4.880259 | -0.961829 | H | -1.456693 | -1.573993 | -3.107035 | H | -2.575335 | 1.635151  | 2.645724  |
| H | -5.255171 | 0.523481  | 3.420663  | H | -4.263345 | 3.028637  | 3.890629  | H | -0.955349 | -1.439880 | 2.653977  |
| H | -3.714175 | 2.893763  | -4.378820 | H | -0.499112 | -4.463428 | -2.586915 | H | -2.640306 | 2.713794  | 1.283899  |
| H | -5.543331 | 3.352195  | 0.559931  | H | -2.560594 | 3.417693  | -3.141389 | H | -4.430327 | 4.106969  | 2.494377  |
| H | -1.975420 | 2.681090  | -4.623267 | H | -1.407514 | -2.917113 | 3.491092  | H | -2.902197 | 4.015025  | 3.367938  |
| H | -2.015101 | -4.646669 | 1.594274  | H | -2.859179 | -0.222221 | 3.868602  | H | -5.084936 | -1.659919 | 0.103990  |
| H | -3.148322 | -1.693830 | 4.807356  | H | -1.006527 | -3.449907 | 0.790872  |   |           |           |           |
| H | -1.467189 | -3.980670 | -3.996267 | H | -1.605007 | -0.837654 | 4.940753  |   |           |           |           |

5.4.2 Compound **6** ( $E = -4582.521840$  Ha)

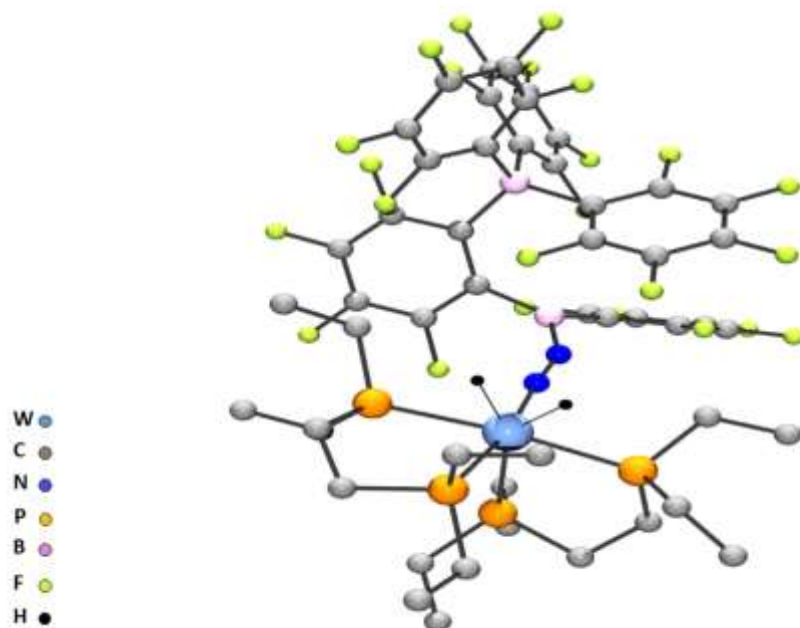

**Figure S42.** Optimized structure for **6**, hydrogen atoms except those bound to tungsten omitted for clarity.

|   |           |           |           |   |           |           |           |   |           |           |           |
|---|-----------|-----------|-----------|---|-----------|-----------|-----------|---|-----------|-----------|-----------|
| C | -4.352476 | -2.498304 | 1.920065  | F | -2.382684 | 6.793010  | -0.243421 | F | -8.269133 | -1.224943 | -1.219088 |
| C | -3.508313 | -2.288254 | 0.824785  | F | -1.143514 | 5.620995  | 1.884796  | F | -8.436909 | 1.433382  | -1.821938 |
| C | -2.755111 | -3.406159 | 0.480252  | F | -0.387495 | 3.067611  | 1.764906  | F | -6.243978 | 3.032397  | -1.438351 |
| C | -2.830932 | -4.634515 | 1.133072  | F | -1.862151 | -3.362724 | -0.531924 | F | -3.985722 | 2.004338  | -0.485915 |
| C | -3.696177 | -4.789323 | 2.205247  | F | -2.062231 | -5.661245 | 0.736714  | N | 0.590831  | 1.073145  | -0.045493 |
| C | -4.467147 | -3.703094 | 2.603736  | F | -3.782568 | -5.957930 | 2.848465  | N | 1.617637  | 0.450322  | 0.038959  |
| B | -3.390445 | -0.758964 | 0.180058  | F | -5.304878 | -3.827669 | 3.639806  | W | 3.252837  | -0.366597 | 0.199665  |
| C | -2.479910 | -0.667367 | -1.207660 | F | -5.122695 | -1.492729 | 2.370259  | P | 5.321256  | -1.950257 | 0.395625  |
| C | -2.887764 | -1.488547 | -2.264954 | C | -2.691227 | 0.046277  | 1.454715  | C | 7.106787  | -1.381237 | 0.454429  |
| C | -2.275874 | -1.537029 | -3.512574 | C | -3.308167 | 0.966838  | 2.309892  | C | 8.192457  | -2.455675 | 0.436371  |
| C | -1.189929 | -0.710927 | -3.759705 | C | -2.723580 | 1.448918  | 3.480839  | P | 3.970639  | 1.490686  | 1.736143  |
| C | -0.775159 | 0.127476  | -2.739625 | C | -1.468246 | 0.998279  | 3.864302  | C | 5.294520  | 1.124501  | 3.016315  |
| C | -1.381424 | 0.192962  | -1.485004 | C | -0.823311 | 0.063035  | 3.069734  | C | 6.242659  | 2.250179  | 3.423752  |
| F | -3.921064 | -2.332276 | -2.108084 | C | -1.434739 | -0.379246 | 1.902983  | P | 4.445944  | 1.278599  | -1.437609 |
| F | -2.709781 | -2.371470 | -4.461871 | F | -3.366192 | 2.338807  | 4.244297  | C | 5.657115  | 0.742924  | -2.772289 |
| F | -0.554128 | -0.738347 | -4.942102 | F | -4.541358 | 1.427436  | 2.070522  | C | 6.825379  | 1.674742  | -3.096213 |
| F | 0.287410  | 0.937797  | -3.022064 | F | -0.751854 | -1.309824 | 1.206167  | P | 2.691311  | -2.088262 | -1.593853 |
| B | -0.699762 | 1.300275  | -0.570261 | F | 0.392046  | -0.389326 | 3.427936  | C | 2.797560  | -1.598388 | -3.397153 |
| C | -1.213641 | 2.794082  | -0.449110 | F | -0.884140 | 1.461279  | 4.974399  | C | 2.355297  | -2.602043 | -4.460107 |
| C | -1.857879 | 3.441252  | -1.510170 | C | -4.872748 | -0.183007 | -0.295116 | C | 2.556246  | 2.167657  | 2.724087  |
| C | -2.251312 | 4.774812  | -1.459429 | C | -6.017972 | -0.949910 | -0.526324 | C | 2.828623  | 3.334619  | 3.669526  |
| C | -2.014463 | 5.516037  | -0.307737 | C | -7.210597 | -0.428245 | -1.027572 | C | 4.597432  | 2.971967  | 0.777990  |
| C | -1.379549 | 4.916342  | 0.775047  | C | -7.301621 | 0.920368  | -1.339113 | C | 5.419822  | 2.510940  | -0.419318 |
| C | -0.992756 | 3.585462  | 0.681519  | C | -6.188211 | 1.726988  | -1.143240 | C | 3.201533  | 2.334925  | -2.338723 |
| F | -2.104082 | 2.796715  | -2.653339 | C | -5.023672 | 1.159075  | -0.642895 | C | 3.705318  | 3.470130  | -3.225279 |
| F | -2.845831 | 5.348092  | -2.506021 | F | -6.044515 | -2.270261 | -0.286688 | C | 1.018980  | -2.885539 | -1.393497 |

|   |          |           |           |   |           |           |           |   |          |           |           |
|---|----------|-----------|-----------|---|-----------|-----------|-----------|---|----------|-----------|-----------|
| C | 0.859535 | -4.343527 | -1.825276 | H | 1.527272  | -5.012962 | -1.274497 | H | 4.563201 | -1.928528 | 3.382672  |
| C | 3.893548 | -3.516595 | -1.446070 | H | 3.510222  | -4.158141 | -0.646121 | H | 4.313537 | 4.195382  | -2.675579 |
| C | 5.309664 | -3.054800 | -1.119384 | H | 6.037355  | -0.238888 | -2.473243 | H | 5.728077 | 3.354273  | -1.045357 |
| C | 5.205457 | -3.220700 | 1.760412  | H | 5.046931  | 0.574236  | -3.666619 | H | 2.527674 | 2.710378  | -1.560848 |
| C | 5.342254 | -2.666610 | 3.174848  | H | -0.162178 | -4.657734 | -1.600190 | H | 5.862417 | 0.272574  | 2.636385  |
| H | 2.595549 | -1.859047 | 0.762750  | H | 5.955243  | -3.996474 | 1.567038  | H | 3.708882 | 3.523812  | 0.450344  |
| H | 3.070156 | -0.711198 | 1.871589  | H | 2.195588  | -0.687024 | -3.478684 | H | 4.738951 | 0.750435  | 3.884500  |
| H | 2.878858 | -3.559701 | -4.378511 | H | 7.496543  | 1.802350  | -2.242002 | H | 6.878816 | 2.568414  | 2.591439  |
| H | 2.562793 | -2.201077 | -5.457808 | H | 6.491444  | 2.666481  | -3.409917 | H | 5.173178 | 3.645542  | 1.419054  |
| H | 3.876330 | -4.112584 | -2.364030 | H | 7.225481  | -0.699598 | -0.396334 | H | 6.907108 | 1.907740  | 4.224261  |
| H | 8.150983 | -3.067147 | -0.469545 | H | 0.312058  | -2.240052 | -1.924063 | H | 5.712256 | 3.130615  | 3.794875  |
| H | 5.970849 | -3.913655 | -0.958073 | H | 4.219171  | -3.679679 | 1.638431  | H | 1.795703 | 2.437695  | 1.986544  |
| H | 1.281234 | -2.790688 | -4.410087 | H | 7.204108  | -0.759469 | 1.351102  | H | 2.142510 | 1.310114  | 3.263356  |
| H | 1.033904 | -4.496260 | -2.892761 | H | 4.294856  | 3.101718  | -4.069891 | H | 3.256211 | 4.200754  | 3.153903  |
| H | 5.731520 | -2.473518 | -1.948178 | H | 0.776290  | -2.774693 | -0.335135 | H | 3.500847 | 3.056987  | 4.486812  |
| H | 8.117931 | -3.125247 | 1.297993  | H | 6.318254  | -2.198918 | 3.342357  | H | 1.886409 | 3.659306  | 4.121683  |
| H | 7.418630 | 1.254287  | -3.914990 | H | 2.593103  | 1.633306  | -2.915897 | H | 5.238354 | -3.474151 | 3.906289  |
| H | 9.184177 | -1.992640 | 0.470776  | H | 2.852129  | 4.014973  | -3.642172 |   |          |           |           |
| H | 3.841289 | -1.305365 | -3.558607 | H | 6.331681  | 2.000391  | -0.087478 |   |          |           |           |

#### 5.4.3 Compound 6' ( $E = -4582.521326$ Ha)

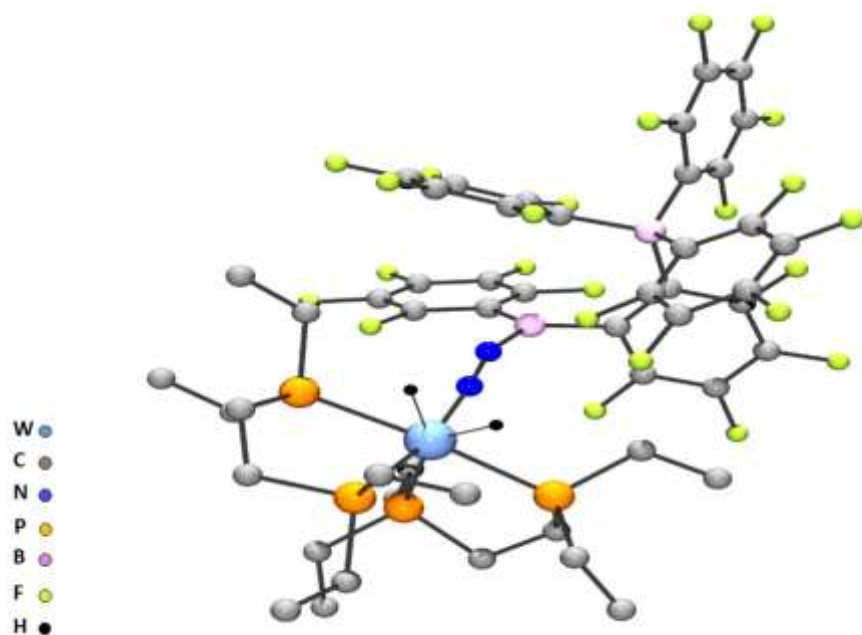

Figure S43. Optimized structure for 6', hydrogen atoms except those bound to tungsten omitted for clarity.

|   |           |           |           |   |           |           |           |   |           |           |           |
|---|-----------|-----------|-----------|---|-----------|-----------|-----------|---|-----------|-----------|-----------|
| C | -3.753430 | -3.503948 | -0.580303 | F | -0.069835 | 0.937388  | 3.369331  | F | -4.198933 | -5.823541 | -0.805333 |
| C | -2.896810 | -2.401387 | -0.528238 | B | -0.792252 | 1.299298  | 0.857179  | F | -5.079528 | -3.373493 | -0.446168 |
| C | -1.547300 | -2.740913 | -0.632178 | C | -1.030939 | 2.862974  | 0.940550  | C | -4.958329 | -0.582698 | -0.348413 |
| C | -1.067357 | -4.030347 | -0.814271 | C | -2.025645 | 3.430230  | 1.754748  | C | -5.584980 | -0.874296 | -1.562445 |
| C | -1.962615 | -5.089786 | -0.877532 | C | -2.210714 | 4.804624  | 1.883888  | C | -6.929057 | -0.642383 | -1.826117 |
| C | -3.317385 | -4.818335 | -0.760142 | C | -1.385695 | 5.680157  | 1.188914  | C | -7.723730 | -0.071910 | -0.838657 |
| B | -3.327802 | -0.824333 | -0.213180 | C | -0.379618 | 5.169410  | 0.375634  | C | -7.149806 | 0.253552  | 0.381870  |
| C | -2.710678 | -0.587136 | 1.312592  | C | -0.223491 | 3.794802  | 0.272909  | C | -5.795207 | 0.003769  | 0.599394  |
| C | -3.225737 | -1.411512 | 2.319451  | F | -2.844554 | 2.666948  | 2.471588  | F | -7.462744 | -0.958387 | -3.012994 |
| C | -2.737551 | -1.471774 | 3.620480  | F | -3.167541 | 5.287362  | 2.674721  | F | -4.871970 | -1.425412 | -2.563910 |
| C | -1.659186 | -0.673956 | 3.975069  | F | -1.546682 | 6.994362  | 1.307049  | F | -5.329841 | 0.387861  | 1.799731  |
| C | -1.138394 | 0.162859  | 3.003998  | F | 0.432752  | 5.999575  | -0.286017 | F | -7.898722 | 0.817185  | 1.338233  |
| C | -1.625588 | 0.242470  | 1.700210  | F | 0.788931  | 3.390002  | -0.521350 | F | -9.019742 | 0.164293  | -1.064526 |
| F | -4.258128 | -2.231484 | 2.059894  | F | -0.609857 | -1.773395 | -0.565262 | C | -2.724034 | 0.259579  | -1.316629 |
| F | -3.277232 | -2.300712 | 4.519538  | F | 0.256879  | -4.269024 | -0.911409 | C | -2.079252 | -0.022987 | -2.525409 |
| F | -1.133041 | -0.729322 | 5.206807  | F | -1.524110 | -6.341990 | -1.043017 | C | -1.693138 | 0.953826  | -3.439174 |

|   |           |           |           |   |          |           |           |   |           |           |           |
|---|-----------|-----------|-----------|---|----------|-----------|-----------|---|-----------|-----------|-----------|
| C | -1.962080 | 2.292138  | -3.189701 | C | 1.908661 | 1.591784  | -3.125113 | H | 7.013409  | -1.021622 | 0.149658  |
| C | -2.643313 | 2.628367  | -2.029550 | C | 2.044177 | 1.885994  | -4.618990 | H | 1.413326  | 2.416840  | -2.604741 |
| C | -3.013987 | 1.618150  | -1.144730 | C | 4.644570 | 0.480676  | -3.372677 | H | 4.076287  | -2.646648 | -3.142193 |
| F | -1.789804 | -1.276955 | -2.899901 | C | 5.807360 | -0.207469 | -2.662784 | H | 6.544186  | -2.706238 | 0.183646  |
| F | -1.042978 | 0.611431  | -4.563101 | C | 4.894136 | -2.942379 | -2.476907 | H | 4.437274  | 3.971822  | 2.760701  |
| F | -1.561981 | 3.234963  | -4.050654 | C | 4.511774 | -4.212619 | -1.724378 | H | 1.274517  | 0.714305  | -2.973581 |
| F | -2.925020 | 3.909910  | -1.763477 | H | 2.616305 | -0.988670 | -1.872199 | H | 5.304408  | -4.544282 | -1.045351 |
| F | -3.709570 | 2.022449  | -0.067965 | H | 2.415271 | -2.009256 | -0.577295 | H | 2.806392  | 2.937587  | 1.120141  |
| N | 0.390584  | 0.869839  | 0.236332  | H | 4.840814 | 3.553881  | -3.784341 | H | 2.774502  | 4.132168  | 3.321483  |
| N | 1.420950  | 0.291740  | 0.059217  | H | 4.832816 | 4.824756  | -2.562964 | H | 5.250985  | -0.597793 | 3.021787  |
| W | 3.066539  | -0.453661 | -0.287379 | H | 5.005967 | 1.245410  | -4.067729 | H | 3.597861  | -4.060525 | -1.144711 |
| P | 5.201392  | -1.451498 | -1.393214 | H | 8.314030 | -1.423479 | -1.994552 | H | 3.820910  | 2.916284  | 4.044175  |
| C | 6.789922  | -1.881040 | -0.493102 | H | 6.464882 | -0.704279 | -3.384761 | H | 4.501817  | 0.688053  | 3.968981  |
| C | 8.005223  | -2.246325 | -1.343565 | H | 3.308847 | 4.251997  | -3.235708 | H | 2.148152  | 1.929775  | 2.372056  |
| P | 2.837593  | -1.894316 | 1.773286  | H | 2.675698 | 2.751922  | -4.829966 | H | 4.894837  | -3.111087 | 1.380817  |
| C | 4.006911  | -3.351624 | 1.969903  | H | 6.417203 | 0.526214  | -2.120414 | H | 2.212431  | -0.254174 | 3.438170  |
| C | 4.418275  | -3.772201 | 3.380101  | H | 7.815297 | -3.120518 | -1.972921 | H | 3.512573  | -4.177758 | 1.446064  |
| P | 4.201142  | 1.020657  | 1.540641  | H | 7.705985 | 2.475544  | 2.302212  | H | 5.005752  | -2.996755 | 3.881870  |
| C | 5.893910  | 1.808559  | 1.329842  | H | 8.857353 | -2.489620 | -0.700242 | H | 3.215482  | -1.489772 | 4.191594  |
| C | 6.770200  | 1.974465  | 2.571633  | H | 5.219437 | 2.682375  | -1.395204 | H | 5.043793  | -4.670139 | 3.333191  |
| P | 3.451903  | 1.230168  | -2.142452 | H | 2.448782 | 1.030088  | -5.167150 | H | 3.561707  | -4.004393 | 4.016786  |
| C | 4.218896  | 2.902393  | -1.785486 | H | 4.069238 | -0.242934 | -3.959506 | H | 0.453822  | -1.788035 | 1.840547  |
| C | 4.301626  | 3.931985  | -2.910340 | H | 6.416922 | 1.205912  | 0.580093  | H | 1.009538  | -3.277577 | 1.131655  |
| C | 1.145770  | -2.621105 | 1.995786  | H | 5.706784 | 2.781532  | 0.862172  | H | 0.955622  | -2.706360 | 4.177888  |
| C | 0.837202  | -3.349716 | 3.300950  | H | 1.050208 | 2.087505  | -5.026593 | H | 1.456265  | -4.241202 | 3.436388  |
| C | 3.116125  | -0.858578 | 3.303607  | H | 5.781852 | -3.103469 | -3.099476 | H | -0.205360 | -3.682084 | 3.288715  |
| C | 4.349436  | 0.019362  | 3.115629  | H | 3.642753 | 3.314419  | -0.950382 | H | 4.324559  | -5.027508 | -2.430558 |
| C | 3.072061  | 2.419151  | 2.045942  | H | 7.035258 | 1.010998  | 3.016039  |   |           |           |           |
| C | 3.564022  | 3.406758  | 3.100223  | H | 6.286440 | 2.576866  | 3.343796  |   |           |           |           |

#### 5.4.4 Compound 7 ( $E = -4582.545643$ Ha)

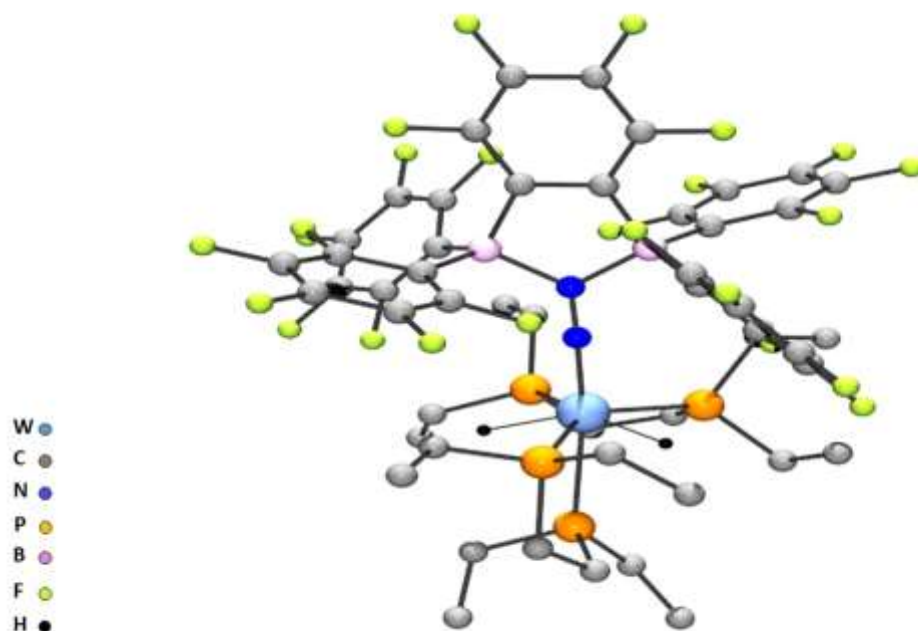

**Figure S44.** Optimized structure for 7, hydrogen atoms except those bound to tungsten omitted for clarity.

|   |           |          |           |   |           |          |           |   |           |           |           |
|---|-----------|----------|-----------|---|-----------|----------|-----------|---|-----------|-----------|-----------|
| C | -1.568056 | 3.314417 | -4.324488 | C | -1.284327 | 1.433622 | -2.861180 | C | -0.514413 | 3.309173  | 1.058737  |
| C | -1.897149 | 4.076270 | -3.211160 | C | -1.596417 | 2.145395 | -1.704652 | C | -1.182333 | 4.331648  | 3.116987  |
| C | 2.412791  | 3.516536 | -3.629310 | C | 4.100248  | 3.011996 | -0.928967 | C | -1.598038 | 2.435963  | 1.017150  |
| C | -1.255046 | 1.974746 | -4.142063 | C | -4.499982 | 1.479184 | -0.550259 | C | -2.286122 | 3.489646  | 3.133332  |
| C | -1.909842 | 3.488991 | -1.946684 | C | -5.714580 | 0.834279 | -0.742180 | C | -3.317745 | 0.775761  | -0.357400 |
| C | 1.799425  | 2.521121 | -2.646410 | C | -0.288551 | 4.245299 | 2.058569  | C | -2.474736 | 2.572947  | 2.098738  |
| C | 3.395646  | 4.132769 | -0.172029 | C | 4.067060  | 0.756391 | -2.818435 | C | -5.747599 | -0.557265 | -0.752977 |

|   |           |           |           |   |           |           |           |
|---|-----------|-----------|-----------|---|-----------|-----------|-----------|
| C | 1.982868  | -2.439462 | -4.427717 | H | 5.594973  | 0.246780  | 3.317642  |
| C | 1.571840  | -1.601835 | -3.220152 | H | 4.566734  | -4.892977 | -1.991350 |
| C | 4.281692  | -0.727425 | -2.541520 | H | 3.454672  | -3.330913 | -0.388242 |
| C | -3.349589 | -0.627100 | -0.365716 | H | 5.362839  | -2.513237 | 0.415942  |
| C | -4.568591 | -1.265667 | -0.559725 | H | 3.407711  | 0.155735  | 4.606058  |
| C | 7.096782  | 1.289139  | 1.162655  | H | 7.260212  | -1.790790 | 1.966858  |
| C | 6.229170  | 0.357331  | 0.317203  | H | 0.174227  | -1.951944 | 2.782107  |
| C | 1.872852  | 2.436742  | 3.867314  | H | 4.281463  | -2.620566 | 1.785394  |
| C | -1.941331 | -2.612355 | -2.365796 | H | 3.732137  | -1.346487 | 3.756106  |
| C | 1.006917  | 1.197707  | 3.660334  | H | 6.171767  | -1.989708 | 3.346947  |
| C | -1.408570 | -2.453296 | -1.081619 | H | 1.792783  | -2.548056 | 3.000855  |
| C | -1.596740 | -3.660247 | -3.221139 | H | 0.024286  | -1.269538 | 5.187823  |
| C | 4.627585  | 0.388118  | 2.826697  | H | 6.614755  | -3.381802 | 2.363344  |
| C | 4.422401  | -3.841735 | -2.261534 | H | 1.732667  | -1.669886 | 5.447402  |
| C | 3.255119  | -3.267497 | -1.459003 | H | 0.561580  | -2.939670 | 5.094775  |
| C | -2.186562 | -1.993784 | 1.487198  | N | -0.966978 | 0.020219  | -0.038206 |
| C | -2.141979 | -1.258635 | 2.669583  | N | 0.279249  | 0.002686  | 0.034801  |
| C | 3.508937  | -0.284281 | 3.609248  | B | -1.845686 | 1.411715  | -0.241407 |
| C | -0.482076 | -3.433601 | -0.723612 | B | -1.938941 | -1.325117 | -0.016298 |
| C | -0.682326 | -4.617075 | -2.803156 | F | -1.527228 | 3.864329  | -5.540724 |
| C | 5.164127  | -2.094529 | 1.408696  | F | -2.196063 | 5.370308  | -3.360196 |
| C | -2.578481 | -1.711938 | 3.910120  | F | -2.239607 | 4.319261  | -0.946897 |
| C | -2.708808 | -3.283208 | 1.662167  | F | -0.876500 | 1.223894  | -5.187004 |
| C | -0.128095 | -4.505541 | -1.534696 | F | -4.510148 | 2.828175  | -0.547673 |
| C | 1.088736  | -1.784744 | 3.352748  | F | -6.845042 | 1.528504  | -0.921142 |
| C | 6.367657  | -2.315963 | 2.321399  | F | 0.794346  | 5.038847  | 2.027777  |
| C | -3.094807 | -2.994398 | 4.022829  | F | 0.398796  | 3.301985  | 0.061242  |
| C | -3.154060 | -3.785616 | 2.883364  | F | -0.963682 | 5.190893  | 4.116062  |
| C | 0.843775  | -1.909672 | 4.853814  | F | -0.912462 | 0.140187  | -2.785603 |
| H | 1.631488  | 3.892705  | -4.296905 | F | -3.151822 | 3.556033  | 4.148170  |
| H | 2.849437  | 4.381575  | -3.122901 | F | -6.909581 | -1.193352 | -0.946294 |
| H | 3.187698  | 3.068694  | -4.260126 | F | -3.563838 | 1.807501  | 2.216371  |
| H | 2.659895  | 4.651344  | -0.790743 | F | -2.839050 | -1.756819 | -2.861117 |
| H | 1.052437  | 2.997445  | -2.011239 | F | -2.135758 | -3.748651 | -4.440115 |
| H | 4.131525  | 4.872861  | 0.159371  | F | -4.651693 | -2.611706 | -0.582703 |
| H | 1.276419  | 1.724299  | -3.180829 | F | -1.604298 | -0.021358 | 2.673936  |
| H | 4.615752  | 3.406227  | -1.812644 | F | -2.467952 | -0.932770 | 4.996313  |
| H | 3.549514  | 0.880931  | -3.774715 | F | -0.325710 | -5.619501 | -3.609728 |
| H | 5.021579  | 1.285241  | -2.911860 | F | 0.101971  | -3.408728 | 0.491852  |
| H | 2.868517  | 3.758438  | 0.706403  | F | -2.810666 | -4.141919 | 0.636784  |
| H | 4.861674  | 2.556466  | -0.291812 | F | 0.764259  | -5.421268 | -1.118074 |
| H | 1.351483  | -0.572675 | -3.514845 | F | -3.508727 | -3.462287 | 5.201729  |
| H | 1.206805  | -2.369786 | -5.196603 | F | -3.634488 | -5.029561 | 2.967126  |
| H | 2.919395  | -2.098925 | -4.881891 | P | 2.990476  | 1.628542  | -1.528971 |
| H | 4.558434  | -1.257551 | -3.458266 | P | 2.755098  | -1.492555 | -1.787938 |
| H | 5.947058  | 0.859966  | -0.610472 | P | 4.641293  | -0.320013 | 1.102713  |
| H | 7.962361  | 1.620536  | 0.579562  | P | 1.840620  | -0.195486 | 2.740505  |
| H | 6.554884  | 2.185362  | 1.479328  | W | 2.108203  | -0.053506 | 0.250495  |
| H | 2.227764  | 2.845605  | 2.917389  |   |           |           |           |
| H | 2.426899  | 1.477861  | 1.014863  |   |           |           |           |
| H | 0.641919  | -1.976272 | -2.785610 |   |           |           |           |
| H | 5.093645  | -0.883382 | -1.826036 |   |           |           |           |
| H | 1.286609  | 3.220593  | 4.355474  |   |           |           |           |
| H | 2.089137  | -3.498137 | -4.175827 |   |           |           |           |
| H | 0.112185  | 1.447737  | 3.089284  |   |           |           |           |
| H | 6.811626  | -0.521662 | 0.018412  |   |           |           |           |
| H | 4.449589  | 1.463277  | 2.731848  |   |           |           |           |
| H | 2.740278  | 2.240920  | 4.505746  |   |           |           |           |
| H | 4.249644  | -3.804695 | -3.339736 |   |           |           |           |
| H | 7.477860  | 0.795979  | 2.060684  |   |           |           |           |
| H | 5.364361  | -3.322009 | -2.058101 |   |           |           |           |
| H | 0.678635  | 0.796732  | 4.624498  |   |           |           |           |
| H | 2.355747  | -3.865121 | -1.619867 |   |           |           |           |
| H | 2.275296  | -1.686632 | 0.784943  |   |           |           |           |



5.4.5 Compound A ( $E = -1345.722637$  Ha)

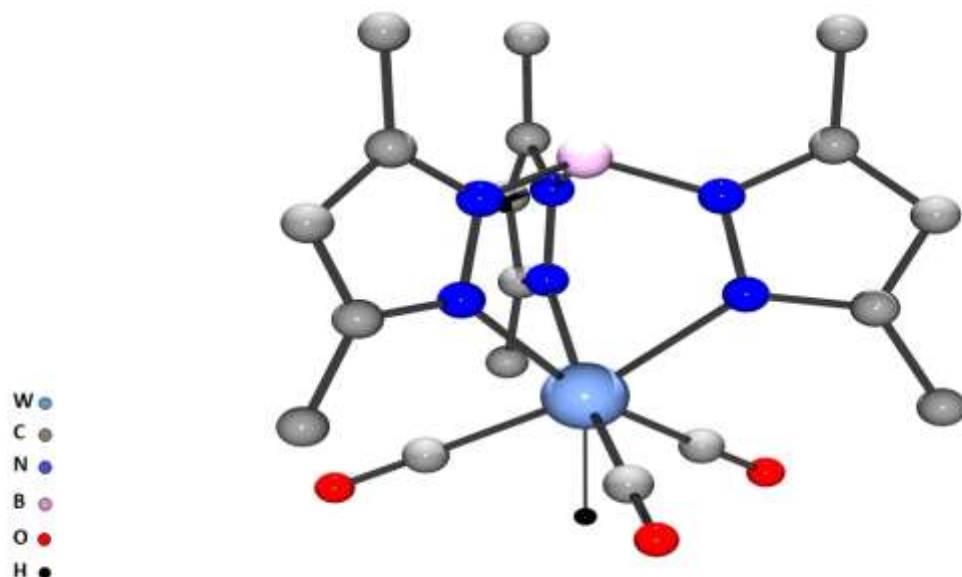

**Figure S45.** Optimized structure for **A**, hydrogen atoms except those bound to tungsten omitted for clarity.

|   |           |           |           |   |           |           |           |
|---|-----------|-----------|-----------|---|-----------|-----------|-----------|
| C | 0.104573  | -0.844891 | 2.929469  | H | -1.807525 | -1.782887 | -3.125401 |
| N | 0.253344  | -0.473940 | 1.645194  | H | 1.588242  | 4.568454  | -1.132473 |
| N | 1.589756  | -0.401463 | 1.395688  | H | 4.095675  | 3.614664  | -0.899375 |
| C | 2.288941  | -0.722677 | 2.508781  | H | 4.213247  | 2.345344  | 0.327073  |
| C | 1.370059  | -1.010810 | 3.505701  | H | 4.212909  | 1.917806  | -1.385340 |
| W | -1.212302 | 0.000536  | -0.000405 | H | -1.061296 | 4.678368  | -1.168292 |
| C | -2.130340 | 0.488019  | -1.697321 | H | -1.815155 | 3.163558  | -1.683327 |
| O | -2.653813 | 0.774886  | -2.696609 | H | -1.802377 | 3.604343  | 0.025478  |
| B | 2.107269  | -0.000383 | 0.000112  | H | 1.585733  | -1.304132 | 4.522843  |
| N | 1.590739  | 1.409044  | -0.350305 | H | 4.093580  | -1.031080 | 3.580973  |
| N | 0.254479  | 1.661917  | -0.412415 | H | 4.212251  | -1.455070 | 1.867683  |
| C | 0.106319  | 2.959686  | -0.733397 | H | 4.211240  | 0.240691  | 2.357074  |
| C | 1.372069  | 3.541012  | -0.877978 | H | -1.064010 | -1.325526 | 4.635325  |
| C | 2.290492  | 2.533174  | -0.628934 | H | -1.817465 | -0.123737 | 3.578794  |
| C | 3.781464  | 2.599791  | -0.645964 | H | -1.803987 | -1.824709 | 3.108560  |
| C | -1.216620 | 3.631283  | -0.897247 | H | 3.303658  | -0.000885 | 0.000283  |
| C | 3.779882  | -0.741179 | 2.575755  | H | -2.919256 | 0.002813  | -0.001919 |
| C | -1.218737 | -1.038207 | 3.592488  |   |           |           |           |
| N | 0.253655  | -1.188585 | -1.232417 |   |           |           |           |
| N | 1.590008  | -1.008311 | -1.045163 |   |           |           |           |
| C | 2.289306  | -1.812488 | -1.879013 |   |           |           |           |
| C | 1.370510  | -2.532817 | -2.626113 |   |           |           |           |
| C | 0.104982  | -2.116504 | -2.194684 |   |           |           |           |
| C | 3.780240  | -1.860848 | -1.928730 |   |           |           |           |
| C | -1.218281 | -2.595527 | -2.692327 |   |           |           |           |
| C | -2.131332 | 1.226665  | 1.269380  |   |           |           |           |
| O | -2.655369 | 1.948618  | 2.017093  |   |           |           |           |
| C | -2.133388 | -1.711360 | 0.425746  |   |           |           |           |
| O | -2.658816 | -2.719236 | 0.676674  |   |           |           |           |
| H | 1.586281  | -3.267678 | -3.388058 |   |           |           |           |
| H | 4.094041  | -2.586572 | -2.682239 |   |           |           |           |
| H | 4.212236  | -0.890633 | -2.193305 |   |           |           |           |
| H | 4.211845  | -2.161988 | -0.969041 |   |           |           |           |
| H | -1.063414 | -3.350537 | -3.466900 |   |           |           |           |
| H | -1.813164 | -3.047063 | -1.894059 |   |           |           |           |

5.4.6 Compound **B** ( $E = -1466.741397$  Ha)

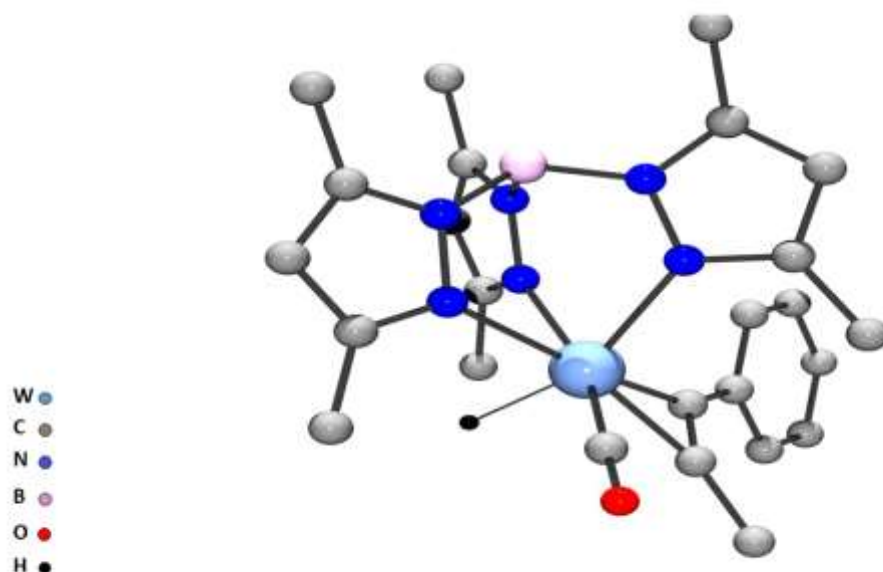

**Figure S46.** Optimized structure for **B**, hydrogen atoms except those bound to tungsten omitted for clarity.

|   |           |           |           |   |           |           |           |
|---|-----------|-----------|-----------|---|-----------|-----------|-----------|
| C | 5.638583  | 0.874023  | -0.286406 | H | 2.207541  | -3.971907 | 0.618449  |
| C | 4.584531  | -0.027890 | -0.397519 | H | 3.651483  | -2.947315 | 0.857442  |
| C | 3.281189  | 0.340788  | -0.017110 | H | 2.064556  | 1.924291  | 0.776780  |
| C | 3.069914  | 1.636050  | 0.486002  | H | 3.951833  | 3.522818  | 1.014969  |
| C | 4.130396  | 2.528160  | 0.615226  | H | 6.241539  | 2.853739  | 0.318490  |
| C | 5.416313  | 2.153046  | 0.225059  | H | 6.637804  | 0.576561  | -0.593433 |
| C | 2.174846  | -0.600588 | -0.116741 | H | 4.760585  | -1.023878 | -0.794004 |
| C | 1.989710  | -1.918830 | -0.004411 | H | -5.062439 | -1.424275 | -1.855466 |
| C | 2.793903  | -3.147086 | 0.204592  | H | -1.505094 | -2.746756 | -2.597231 |
| W | 0.198982  | -0.976411 | -0.325719 | H | -3.223856 | -3.139303 | -2.862975 |
| C | -0.114560 | -2.875404 | 0.032701  | H | -2.390872 | -3.697112 | -1.404648 |
| O | -0.263778 | -4.021039 | 0.232587  | H | -5.195402 | 1.282085  | 0.745553  |
| N | -0.027435 | 1.159573  | -1.038828 | H | -6.056058 | 0.810079  | -0.726803 |
| N | -0.963186 | 1.990981  | -0.499443 | H | -4.876059 | 2.127305  | -0.770400 |
| C | -0.940689 | 3.189803  | -1.130238 | H | -0.766148 | 0.281242  | 4.857634  |
| C | 0.042472  | 3.126608  | -2.103395 | H | 1.729789  | -1.480475 | 2.910875  |
| C | 0.582875  | 1.833964  | -2.027281 | H | 0.396678  | -2.609313 | 2.660692  |
| B | -2.038813 | 1.413551  | 0.439614  | H | 0.673951  | -1.904515 | 4.268249  |
| N | -1.386360 | 0.857904  | 1.715726  | H | -2.433484 | 2.386304  | 4.543333  |
| N | -0.553201 | -0.211078 | 1.622624  | H | -3.510666 | 2.138981  | 3.161294  |
| C | -0.214539 | -0.566483 | 2.877365  | H | -2.156926 | 3.263071  | 3.031117  |
| C | -0.839931 | 0.302331  | 3.779920  | H | 0.329032  | 3.910895  | -2.789283 |
| C | -1.584431 | 1.185976  | 3.011808  | H | 1.450813  | 0.182100  | -3.060757 |
| C | 1.640753  | 1.245923  | -2.897669 | H | 2.634587  | 1.345497  | -2.450674 |
| C | 0.695765  | -1.703280 | 3.194274  | H | 1.651718  | 1.760975  | -3.862332 |
| C | -1.851857 | 4.322157  | -0.788885 | H | -1.801044 | 4.581591  | 0.273043  |
| C | -2.468960 | 2.303415  | 3.454835  | H | -1.567515 | 5.204295  | -1.367058 |
| N | -2.035920 | -0.815010 | -0.752179 | H | -2.897119 | 4.091513  | -1.019560 |
| N | -2.749392 | 0.252158  | -0.293149 | H | 0.109647  | -1.295785 | -2.022433 |
| C | -4.042172 | 0.141669  | -0.672942 |   |           |           |           |
| C | -4.163979 | -1.032104 | -1.401213 |   |           |           |           |
| C | -2.885735 | -1.603356 | -1.434110 |   |           |           |           |
| C | -2.477416 | -2.866782 | -2.112365 |   |           |           |           |
| C | -5.093352 | 1.146527  | -0.335613 |   |           |           |           |
| H | -2.832262 | 2.263813  | 0.726096  |   |           |           |           |
| H | 3.189675  | -3.485030 | -0.761070 |   |           |           |           |



5.4.7 Compound C ( $E = -1704.654681$  Ha)

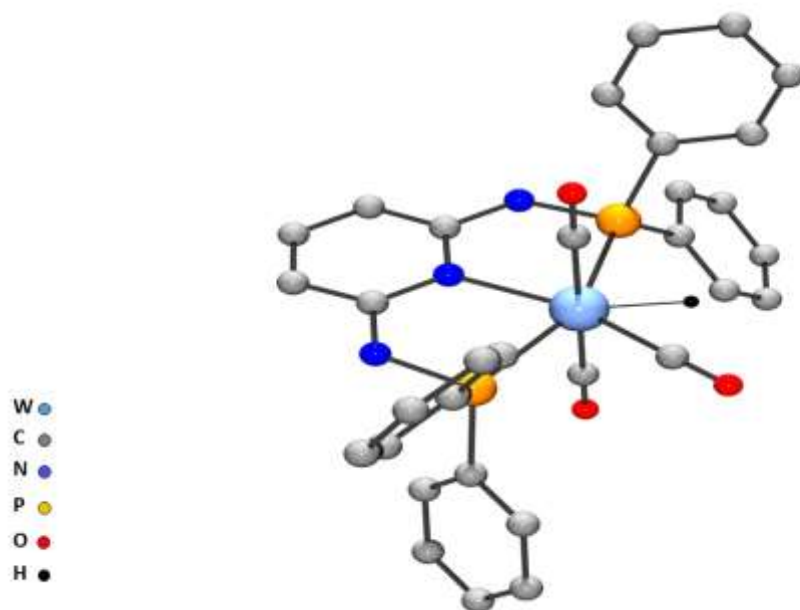

**Figure S47.** Optimized structure for C, hydrogen atoms except those bound to tungsten omitted for clarity.

|   |           |           |           |   |           |           |           |
|---|-----------|-----------|-----------|---|-----------|-----------|-----------|
| W | -0.032459 | 0.030146  | -0.380804 | C | 3.436373  | -2.485000 | 0.821571  |
| H | -1.012298 | -0.201844 | -1.793931 | H | 2.908177  | -2.380969 | 1.764982  |
| P | 2.420158  | 0.069181  | 0.170277  | C | -3.508809 | -1.486976 | -0.314018 |
| P | -2.454855 | -0.054189 | 0.137777  | C | -3.082551 | -2.424658 | -1.259553 |
| N | -0.046503 | 0.056315  | 1.895049  | H | -2.119495 | -2.311123 | -1.745814 |
| N | 2.292594  | 0.170491  | 1.898336  | C | -3.900912 | -3.505108 | -1.588978 |
| H | 3.134127  | 0.284583  | 2.447701  | H | -3.565074 | -4.227949 | -2.326206 |
| N | -2.384803 | -0.075976 | 1.873570  | C | -5.140896 | -3.655201 | -0.973437 |
| H | -3.234978 | -0.134982 | 2.417446  | H | -5.774590 | -4.499668 | -1.227530 |
| C | 1.113447  | 0.133496  | 2.602012  | C | -5.576474 | -2.715169 | -0.037224 |
| C | 1.139105  | 0.167146  | 3.999444  | H | -6.548809 | -2.823985 | 0.433713  |
| H | 2.086563  | 0.233610  | 4.521732  | C | -4.770344 | -1.628834 | 0.284716  |
| C | -0.062841 | 0.103216  | 4.686302  | H | -5.138861 | -0.885036 | 0.987284  |
| H | -0.069146 | 0.122860  | 5.771649  | C | -3.533216 | 1.388215  | -0.223178 |
| C | -1.256591 | 0.010682  | 3.988289  | C | -4.279878 | 1.405267  | -1.408599 |
| H | -2.209377 | -0.043658 | 4.502218  | H | -4.275616 | 0.546950  | -2.074740 |
| C | -1.215429 | -0.005983 | 2.590987  | C | -5.046005 | 2.523099  | -1.729495 |
| C | 3.577904  | 1.421175  | -0.276824 | H | -5.624559 | 2.532202  | -2.648311 |
| C | 3.129060  | 2.547295  | -0.974640 | C | -5.077535 | 3.621003  | -0.869911 |
| H | 2.096980  | 2.616195  | -1.297884 | H | -5.680612 | 4.488677  | -1.120135 |
| C | 4.012375  | 3.585759  | -1.265697 | C | -4.337556 | 3.604371  | 0.311446  |
| H | 3.659114  | 4.453583  | -1.814167 | H | -4.362321 | 4.457128  | 0.983270  |
| C | 5.341777  | 3.506857  | -0.856873 | C | -3.559925 | 2.494261  | 0.634213  |
| H | 6.028130  | 4.317330  | -1.083616 | H | -2.980222 | 2.491183  | 1.552815  |
| C | 5.796563  | 2.382988  | -0.164947 | C | -0.247813 | 2.058859  | -0.388206 |
| H | 6.835109  | 2.316233  | 0.145103  | O | -0.388898 | 3.205314  | -0.404570 |
| C | 4.923148  | 1.337524  | 0.117256  | C | 0.120410  | -2.008802 | -0.321590 |
| H | 5.294616  | 0.452135  | 0.626820  | O | 0.207235  | -3.158762 | -0.289319 |
| C | 3.416347  | -1.447770 | -0.117240 | C | 0.613840  | 0.142845  | -2.274909 |
| C | 4.093075  | -1.595683 | -1.336003 | O | 0.984290  | 0.214522  | -3.368718 |
| H | 4.093735  | -0.793090 | -2.068643 |   |           |           |           |
| C | 4.784512  | -2.773841 | -1.606611 |   |           |           |           |
| H | 5.308337  | -2.884193 | -2.551316 |   |           |           |           |
| C | 4.810636  | -3.803028 | -0.665330 |   |           |           |           |
| H | 5.355191  | -4.718280 | -0.877272 |   |           |           |           |
| C | 4.139586  | -3.656703 | 0.547548  |   |           |           |           |
| H | 4.159956  | -4.455768 | 1.282572  |   |           |           |           |

5.4.8 Compound **D** ( $E = -1252.420032$  Ha)

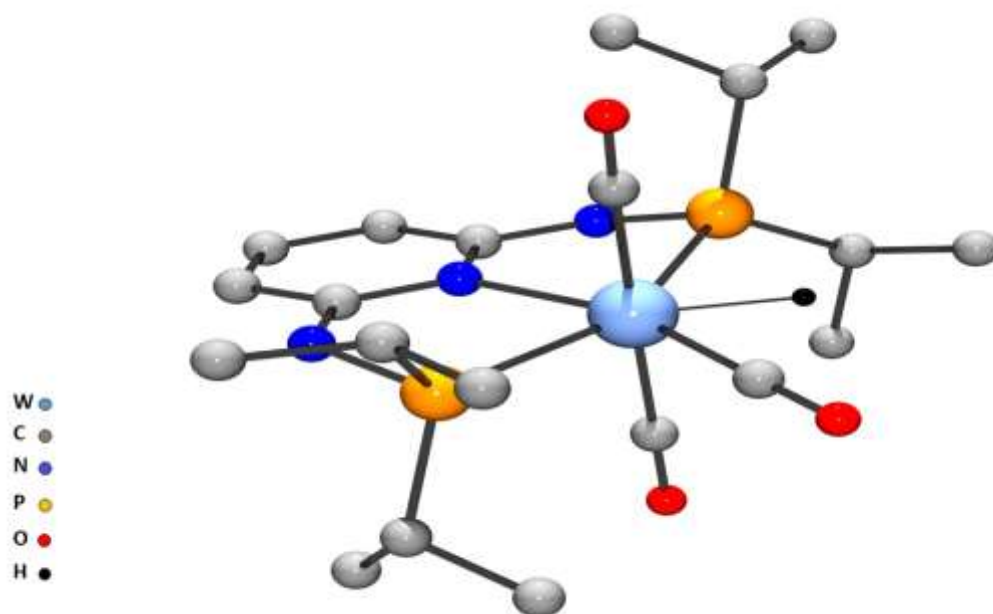

**Figure S48.** Optimized structure for **D**, hydrogen atoms except those bound to tungsten omitted for clarity.

|   |           |           |           |   |           |           |           |
|---|-----------|-----------|-----------|---|-----------|-----------|-----------|
| W | 0.026768  | -0.592057 | 0.045141  | H | -4.602101 | 0.034138  | -0.862736 |
| C | -0.015080 | -0.553676 | 2.081171  | C | -3.363880 | 0.773442  | -2.461248 |
| O | -0.069260 | -0.601795 | 3.236249  | C | -3.559118 | -1.638452 | -1.729548 |
| H | 0.961843  | -2.046897 | 0.195158  | H | -5.027528 | 0.666742  | 2.840222  |
| C | -0.673141 | -2.469459 | 0.094120  | H | -4.202940 | 1.900845  | 1.904213  |
| O | -1.054544 | -3.562935 | 0.109808  | H | -5.302179 | 0.749843  | 1.105712  |
| C | 0.018961  | -0.706133 | -1.991942 | H | -4.263528 | -1.724712 | 2.852957  |
| O | -0.024995 | -0.800839 | -3.143713 | H | -4.646625 | -1.817561 | 1.137248  |
| P | -2.397098 | 0.131666  | 0.127263  | H | -3.042511 | -2.302766 | 1.722102  |
| N | -2.130765 | 1.849687  | 0.148751  | H | -4.350790 | -1.819098 | -2.463873 |
| H | -2.928841 | 2.469602  | 0.175039  | H | -2.605940 | -1.871512 | -2.211914 |
| C | -0.933850 | 2.457104  | -0.146627 | H | -3.707424 | -2.345428 | -0.909894 |
| N | 0.175803  | 1.673733  | -0.212159 | H | -4.077592 | 0.543934  | -3.259224 |
| C | 1.364454  | 2.273636  | -0.506389 | H | -3.496379 | 1.825041  | -2.195019 |
| C | 1.472863  | 3.648091  | -0.732362 | H | -2.360419 | 0.650105  | -2.878428 |
| C | 0.328980  | 4.427398  | -0.651757 | H | 5.287884  | 0.137044  | 2.653439  |
| C | -0.889942 | 3.839302  | -0.355289 | H | 5.317535  | -0.898454 | 1.230996  |
| H | -1.799139 | 4.426085  | -0.290653 | H | 5.251242  | 0.866319  | 1.054088  |
| H | 0.388188  | 5.497840  | -0.822186 | H | 3.155513  | 1.152730  | 3.521361  |
| H | 2.438189  | 4.084269  | -0.962588 | H | 3.245104  | 2.134817  | 2.056783  |
| N | 2.480838  | 1.471610  | -0.582976 | H | 1.747086  | 1.292941  | 2.471718  |
| H | 3.354809  | 1.962074  | -0.721076 | H | 4.560252  | -3.027601 | -1.192137 |
| P | 2.475417  | -0.151433 | 0.048103  | H | 4.012128  | -2.645125 | 0.440144  |
| C | -3.379303 | -0.127966 | 1.708176  | H | 2.836274  | -3.064198 | -0.817404 |
| C | -3.609943 | -0.172204 | -1.284283 | H | 4.176400  | -1.338682 | -3.132975 |
| C | 3.669097  | -1.065242 | -1.063743 | H | 2.454548  | -1.529738 | -2.814237 |
| C | 3.356386  | -0.013738 | 1.714904  | H | 3.171409  | 0.089701  | -2.860978 |
| C | 4.885529  | 0.016467  | 1.642237  |   |           |           |           |
| C | 2.835978  | 1.210572  | 2.476501  |   |           |           |           |
| H | 3.037913  | -0.922546 | 2.242383  |   |           |           |           |
| H | 4.632491  | -0.572586 | -0.879436 |   |           |           |           |
| C | 3.770906  | -2.529185 | -0.620893 |   |           |           |           |
| C | 3.337476  | -0.944928 | -2.549780 |   |           |           |           |
| C | -4.536555 | 0.859246  | 1.880671  |   |           |           |           |
| C | -3.851276 | -1.578301 | 1.849714  |   |           |           |           |
| H | -2.632471 | 0.075048  | 2.484373  |   |           |           |           |

5.4.9 Compound **E** ( $E = -1409.587756$  Ha)

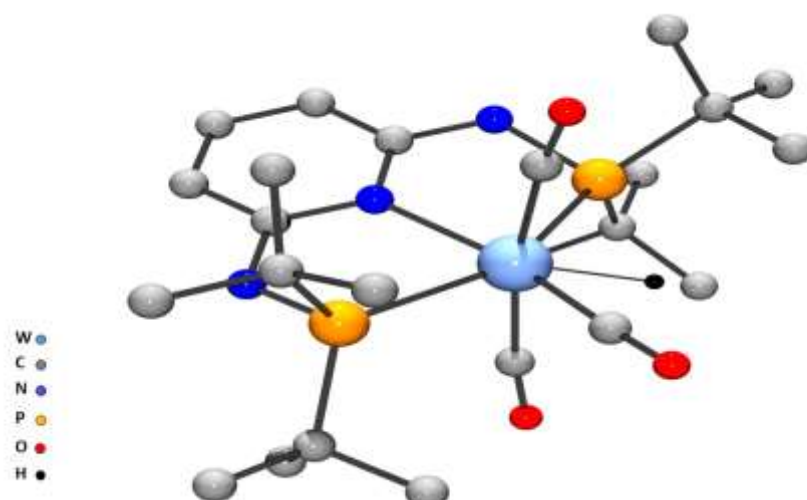

**Figure S49.** Optimized structure for **E**, hydrogen atoms except those bound to tungsten omitted for clarity.

|   |           |           |           |   |           |           |           |
|---|-----------|-----------|-----------|---|-----------|-----------|-----------|
| W | 0.027166  | -0.578715 | -0.020168 | H | -5.601983 | 0.080088  | 1.095110  |
| C | 0.119785  | -0.805201 | 1.996541  | H | -4.071097 | -1.415702 | 3.046999  |
| O | 0.151272  | -1.086101 | 3.121035  | H | -4.127407 | -2.004974 | 1.387181  |
| H | 0.997245  | -1.992877 | -0.252902 | H | -2.571295 | -1.843034 | 2.224656  |
| C | -0.597310 | -2.477652 | 0.062642  | H | -3.903279 | -2.286138 | -2.658554 |
| O | -0.925935 | -3.584570 | 0.151600  | H | -2.230026 | -2.134882 | -2.132433 |
| C | -0.020039 | -0.708672 | -2.051506 | H | -3.492458 | -2.583158 | -0.971672 |
| O | -0.020124 | -0.945347 | -3.185824 | H | -3.567293 | -0.055321 | -3.675012 |
| P | -2.472896 | 0.079734  | -0.053649 | H | -3.515162 | 1.413095  | -2.696368 |
| N | -2.233655 | 1.784035  | -0.323875 | H | -2.055912 | 0.446273  | -2.923343 |
| H | -3.045330 | 2.382161  | -0.402496 | H | 5.647193  | -1.327007 | 1.867452  |
| C | -1.063800 | 2.445550  | -0.040098 | H | 5.398824  | -1.380928 | 0.128069  |
| N | 0.066178  | 1.704591  | 0.131894  | H | 5.517592  | 0.181237  | 0.973189  |
| C | 1.219805  | 2.369396  | 0.427474  | H | 3.885536  | -0.821913 | 3.463927  |
| C | 1.273664  | 3.760650  | 0.556780  | H | 3.849408  | 0.783690  | 2.735220  |
| C | 0.112877  | 4.492812  | 0.364690  | H | 2.348957  | -0.118223 | 2.972629  |
| C | -1.070598 | 3.841250  | 0.059562  | H | 3.957917  | -0.987670 | -3.352510 |
| H | -1.994221 | 4.388937  | -0.089835 | H | 4.119389  | -1.828203 | -1.812270 |
| H | 0.130920  | 5.574587  | 0.454260  | H | 2.515731  | -1.572080 | -2.522948 |
| H | 2.213832  | 4.245289  | 0.794478  | H | 2.899381  | 1.226713  | -3.511246 |
| N | 2.364001  | 1.626829  | 0.603106  | H | 1.491482  | 1.002118  | -2.480168 |
| H | 3.200163  | 2.174171  | 0.758088  | H | 2.672982  | 2.256587  | -2.095672 |
| P | 2.507578  | -0.010459 | 0.019519  | H | 3.863240  | -2.890012 | 2.092256  |
| C | -3.451286 | 0.072651  | 1.609926  | H | 2.178263  | -2.497133 | 1.747166  |
| C | -3.549584 | -0.464854 | -1.567335 | H | 3.297045  | -2.864794 | 0.422579  |
| C | 3.410705  | 0.243204  | -1.664480 | H | 5.089732  | 1.231189  | -2.560655 |
| C | 3.624036  | -0.888940 | 1.335549  | H | 4.835686  | 1.750273  | -0.904444 |
| C | 5.128081  | -0.837298 | 1.035850  | H | 5.581920  | 0.177032  | -1.245233 |
| C | 3.397391  | -0.211276 | 2.695906  | H | -3.016980 | 0.745059  | 3.607857  |
| C | 3.201756  | -2.366519 | 1.393129  | H | -1.568866 | 0.669202  | 2.613389  |
| C | 4.810116  | 0.874707  | -1.562811 | H | -2.725334 | 1.985179  | 2.385423  |
| C | 3.497249  | -1.118634 | -2.366822 | H | -5.541942 | -0.545534 | -2.336063 |
| C | 2.555010  | 1.235986  | -2.471264 | H | -5.470842 | -0.992043 | -0.637904 |
| C | -4.848716 | 0.712091  | 1.560696  | H | -5.362249 | 0.716746  | -1.124295 |
| C | -3.552926 | -1.383686 | 2.081919  |   |           |           |           |
| C | -2.628739 | 0.916549  | 2.597809  |   |           |           |           |
| C | -5.063681 | -0.302542 | -1.380333 |   |           |           |           |
| C | -3.133143 | 0.391528  | -2.773533 |   |           |           |           |
| C | -3.262935 | -1.951097 | -1.834966 |   |           |           |           |
| H | -5.171242 | 0.889381  | 2.592970  |   |           |           |           |
| H | -4.853702 | 1.688313  | 1.063186  |   |           |           |           |

5.4.10 Compound F ( $E = -2219.506031$  Ha)

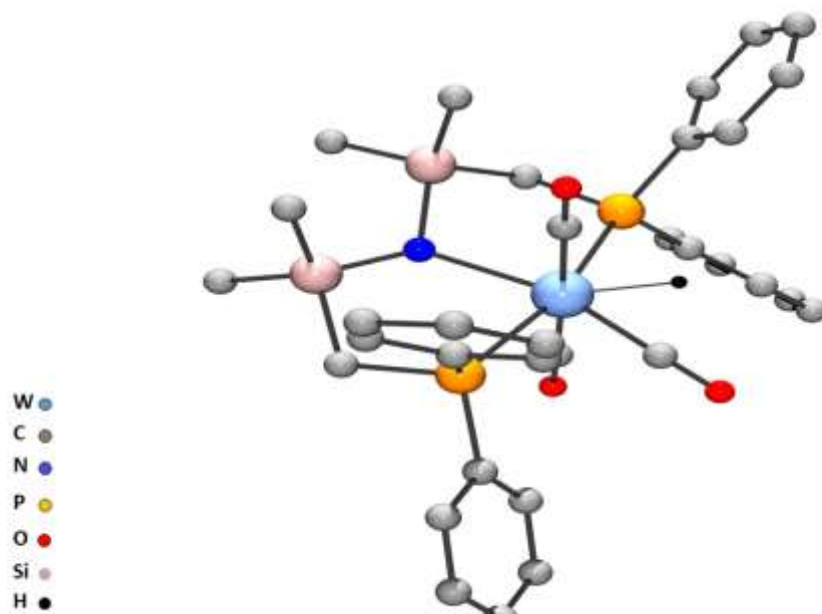

**Figure S50.** Optimized structure for F, hydrogen atoms except those bound to tungsten omitted for clarity.

|    |           |           |           |   |           |           |           |   |           |           |           |
|----|-----------|-----------|-----------|---|-----------|-----------|-----------|---|-----------|-----------|-----------|
| C  | 2.930421  | 2.992758  | -0.517042 | C | -5.072401 | -1.987932 | 3.222363  | H | 3.984078  | -0.916434 | 4.409274  |
| C  | 3.521928  | 1.766505  | -0.195206 | C | -5.635950 | -1.732458 | 1.971299  | H | 2.770650  | 0.383244  | 2.710851  |
| C  | 4.902795  | 1.709988  | 0.041966  | C | -4.879950 | -1.120476 | 0.976394  | H | 5.375963  | 0.769449  | 0.307737  |
| C  | 5.675533  | 2.864460  | -0.050775 | C | -1.767452 | -2.978946 | -3.534563 | H | 6.743873  | 2.811493  | 0.137187  |
| C  | 5.080613  | 4.083327  | -0.375799 | C | 1.604340  | -2.058980 | -4.152653 | H | 5.685181  | 4.983083  | -0.441416 |
| C  | 3.708527  | 4.145825  | -0.608476 | C | 1.822482  | -3.497699 | -1.420347 | H | 3.237247  | 5.092977  | -0.853453 |
| P  | 2.522719  | 0.210442  | -0.165417 | H | -2.584169 | 2.532437  | 1.520140  | H | 1.862841  | 3.058759  | -0.691104 |
| C  | 3.441342  | -0.831741 | 1.048100  | H | -3.806872 | 4.662173  | 1.376789  | H | -0.981808 | 0.968499  | 1.416958  |
| C  | 4.225890  | -1.929320 | 0.678698  | H | -5.398061 | 5.070484  | -0.488702 |   |           |           |           |
| C  | 4.910498  | -2.664770 | 1.647410  | H | -5.765768 | 3.312190  | -2.203305 |   |           |           |           |
| C  | 4.823660  | -2.305894 | 2.989731  | H | -4.566062 | 1.173599  | -2.065791 |   |           |           |           |
| C  | 4.050954  | -1.206196 | 3.364883  | H | -1.968627 | -0.720708 | 2.691576  |   |           |           |           |
| C  | 3.361677  | -0.474714 | 2.402864  | H | -3.312620 | -1.806132 | 4.452048  |   |           |           |           |
| W  | -0.036703 | 0.307704  | 0.137555  | H | -5.664908 | -2.464137 | 3.997888  |   |           |           |           |
| N  | -0.059745 | -1.141445 | -1.785437 | H | -6.668716 | -2.003351 | 1.772629  |   |           |           |           |
| Si | 1.545537  | -1.862306 | -2.285036 | H | -5.346057 | -0.901018 | 0.019539  |   |           |           |           |
| C  | 2.807293  | -0.533448 | -1.833717 | H | -2.839852 | -0.154165 | -2.486771 |   |           |           |           |
| C  | 0.520195  | 1.623390  | 1.512519  | H | -3.919989 | -1.278863 | -1.648468 |   |           |           |           |
| O  | 0.826034  | 2.399833  | 2.320607  | H | -1.638159 | -2.275878 | -4.363417 |   |           |           |           |
| P  | -2.571067 | 0.098390  | -0.093163 | H | -2.778606 | -3.394948 | -3.613475 |   |           |           |           |
| C  | -2.912681 | -0.852278 | -1.643576 | H | -1.070779 | -3.810483 | -3.679418 |   |           |           |           |
| Si | -1.576802 | -2.170459 | -1.849682 | H | -0.803969 | -4.138068 | -0.501848 |   |           |           |           |
| C  | -1.659633 | -3.458998 | -0.499099 | H | -2.555415 | -4.065059 | -0.680271 |   |           |           |           |
| C  | 0.208496  | -1.292584 | 1.380931  | H | -1.755058 | -3.032500 | 0.501139  |   |           |           |           |
| O  | 0.368089  | -2.182971 | 2.100842  | H | -0.234062 | -0.433152 | -2.504820 |   |           |           |           |
| C  | -0.300795 | 1.850357  | -1.159919 | H | 0.954213  | -2.856188 | -4.521505 |   |           |           |           |
| O  | -0.475185 | 2.711611  | -1.915117 | H | 2.628180  | -2.308994 | -4.454183 |   |           |           |           |
| C  | -3.478001 | 1.699474  | -0.267523 | H | 1.335725  | -1.133330 | -4.673915 |   |           |           |           |
| C  | -3.278236 | 2.693998  | 0.699809  | H | 1.729980  | -3.435794 | -0.332945 |   |           |           |           |
| C  | -3.969692 | 3.899424  | 0.621174  | H | 2.833634  | -3.853482 | -1.647342 |   |           |           |           |
| C  | -4.863378 | 4.127514  | -0.425406 | H | 1.132424  | -4.264043 | -1.786954 |   |           |           |           |
| C  | -5.068797 | 3.142410  | -1.387897 | H | 3.845255  | -0.862952 | -1.951295 |   |           |           |           |
| C  | -4.382560 | 1.930484  | -1.309479 | H | 2.669873  | 0.300358  | -2.534417 |   |           |           |           |
| C  | -3.544476 | -0.767470 | 1.219021  | H | 4.319386  | -2.220659 | -0.361966 |   |           |           |           |
| C  | -2.991964 | -1.011226 | 2.479959  | H | 5.516119  | -3.514924 | 1.347318  |   |           |           |           |
| C  | -3.753707 | -1.621031 | 3.477156  | H | 5.358823  | -2.877558 | 3.742001  |   |           |           |           |

## 5.5 Frontier Kohn-Sham Orbitals of 7 and 10

Table S7. Comparison of the frontier orbitals of 7 and 10, rendered with Avogadro.<sup>S20</sup>

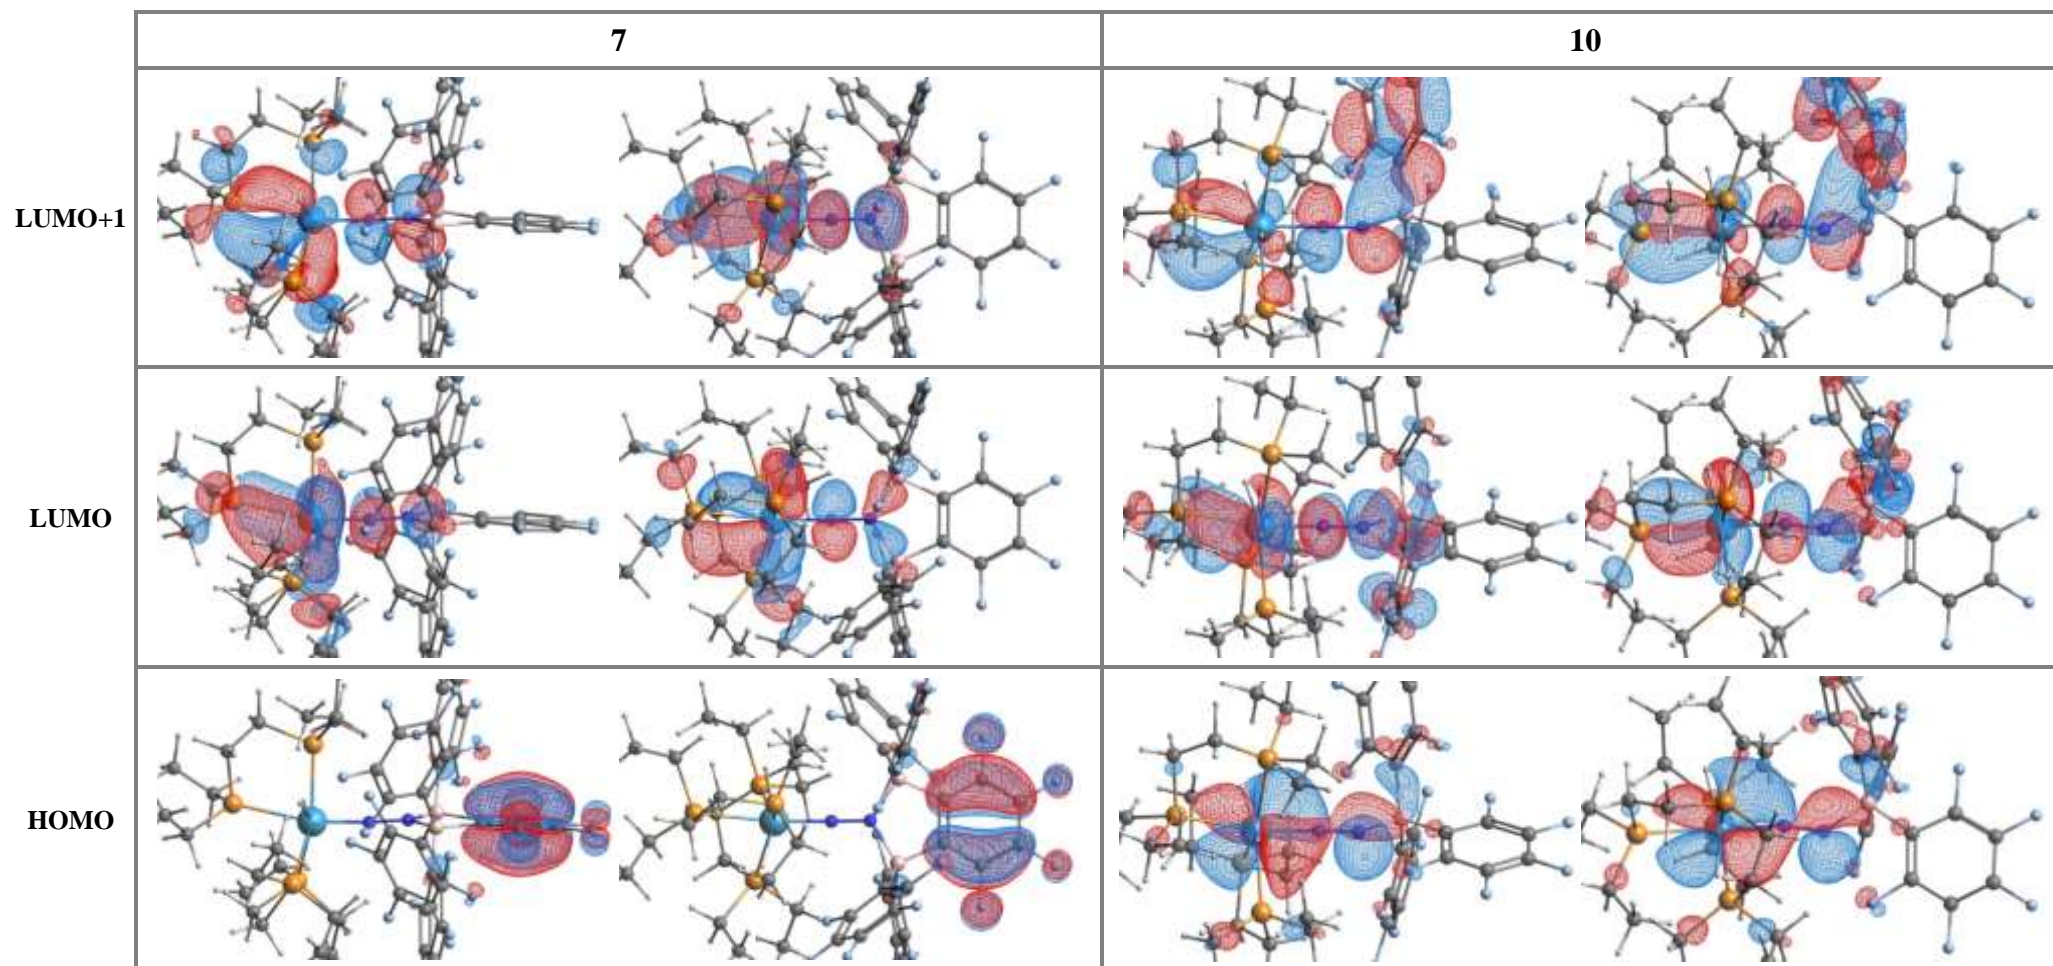



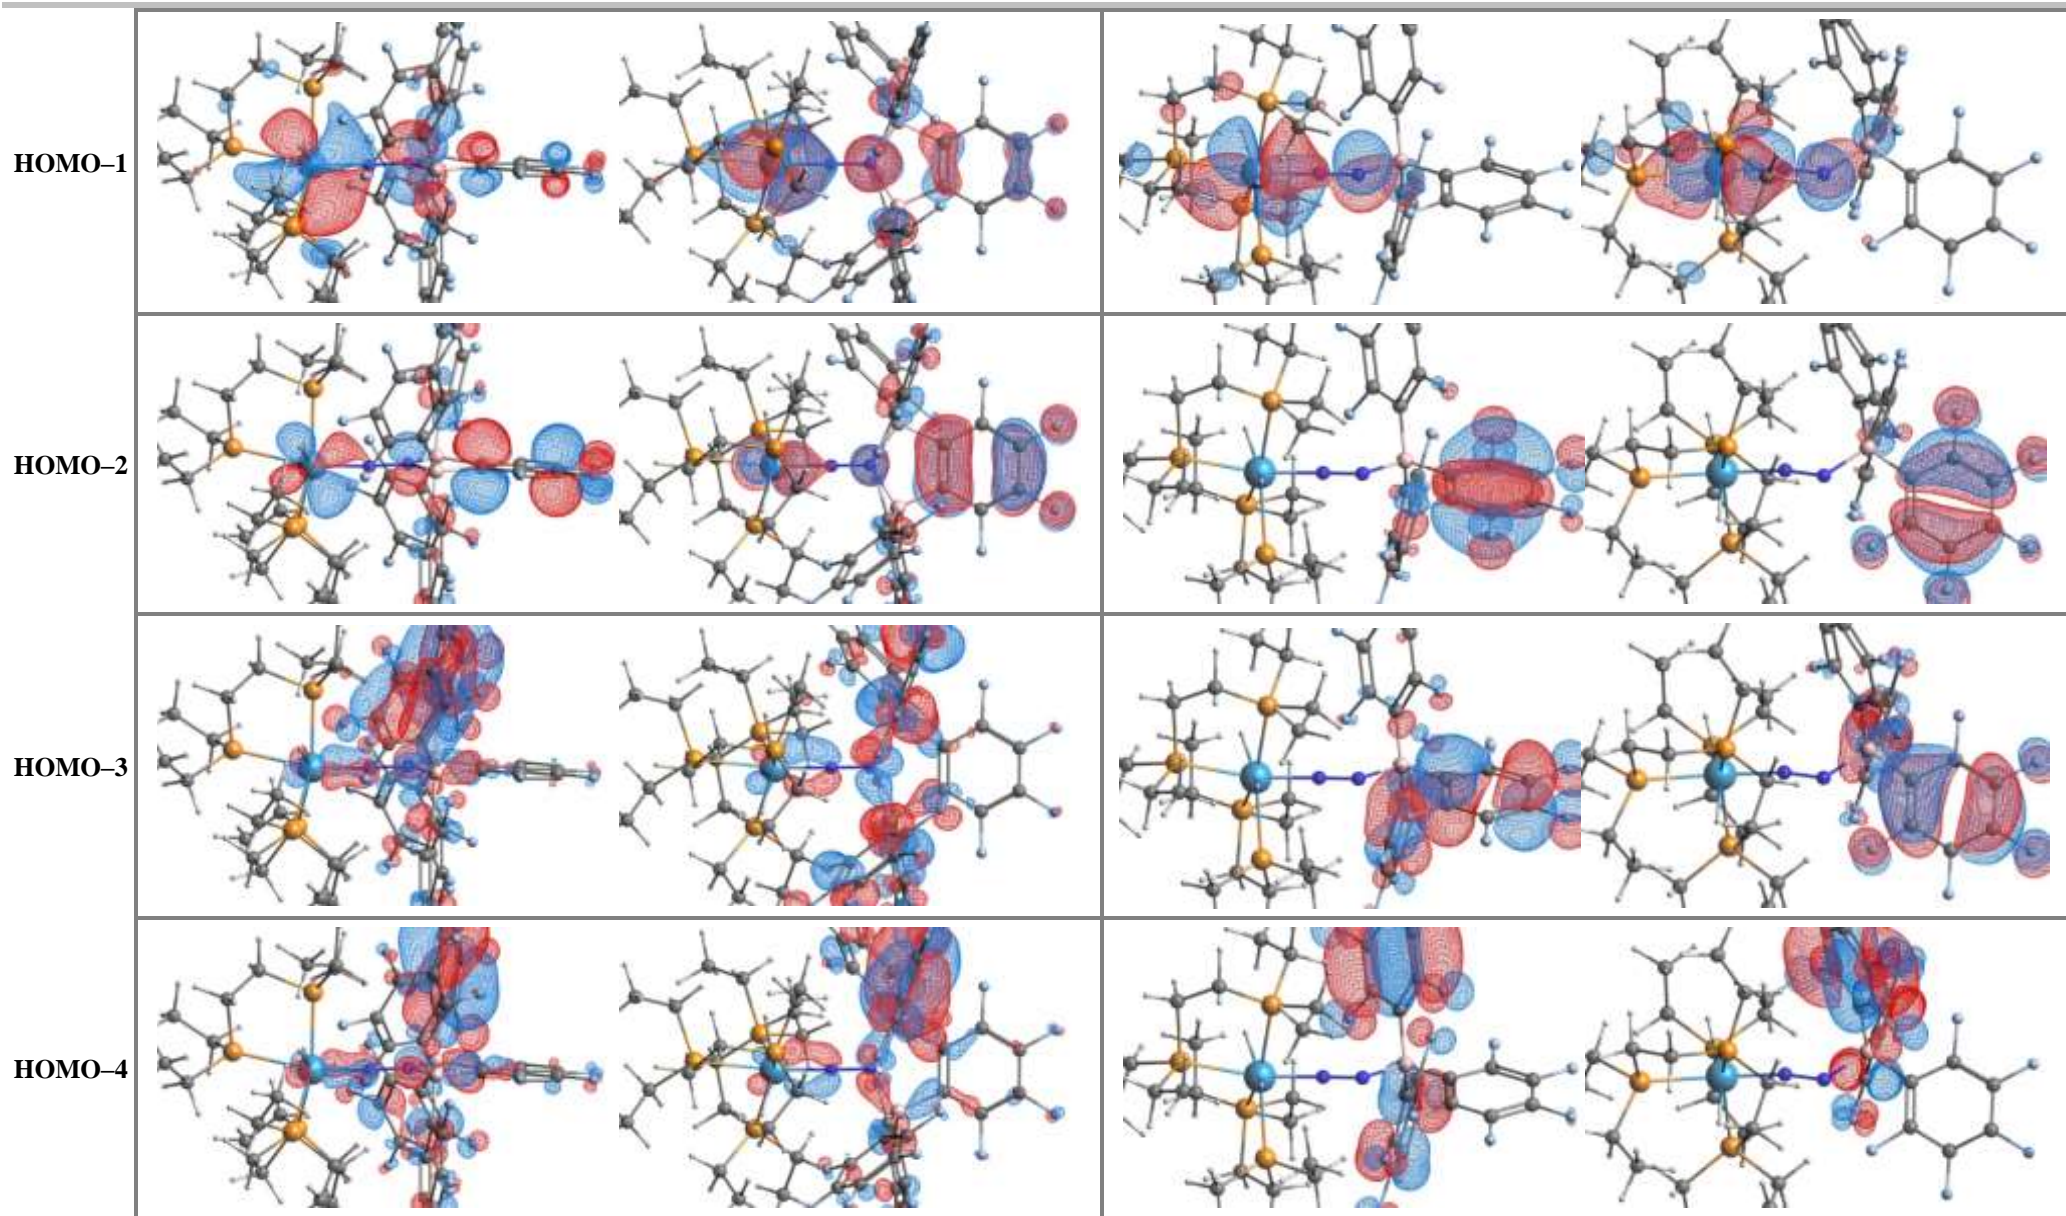

## 5.6 Coordinates of optimized geometries of 7 and 10 with dispersion (6-31G(d,p)-D3BJ)

### 5.6.1 Compound 7

|   |              |              |              |   |              |              |              |
|---|--------------|--------------|--------------|---|--------------|--------------|--------------|
| C | -1.001058000 | 3.358179000  | -4.303759000 | H | 3.019532000  | 3.451223000  | 0.906373000  |
| C | -1.368699000 | 4.143055000  | -3.218124000 | H | 4.954855000  | 2.326621000  | -0.253721000 |
| C | 2.558598000  | 3.350059000  | -3.518530000 | H | 1.435252000  | -0.622585000 | -3.436478000 |
| C | -0.860666000 | 1.990960000  | -4.121463000 | H | 1.144965000  | -2.518285000 | -5.017076000 |
| C | -1.578994000 | 3.549196000  | -1.976008000 | H | 2.870304000  | -2.334035000 | -4.689797000 |
| C | 1.904023000  | 2.334391000  | -2.591098000 | H | 4.544261000  | -1.500263000 | -3.248287000 |
| C | 3.488050000  | 3.881350000  | 0.020541000  | H | 5.866312000  | 0.549417000  | -0.465142000 |
| C | -1.074080000 | 1.445327000  | -2.861983000 | H | 7.620261000  | 1.668203000  | 0.842760000  |
| C | -1.413581000 | 2.182542000  | -1.734079000 | H | 6.073571000  | 2.137734000  | 1.550888000  |
| C | 4.159824000  | 2.808961000  | -0.821839000 | H | 2.272828000  | 2.619813000  | 2.988518000  |
| C | -4.403820000 | 1.709982000  | -0.698098000 | H | 2.399398000  | 1.377341000  | 1.097715000  |
| C | -5.639935000 | 1.128053000  | -0.945949000 | H | 0.569367000  | -1.910039000 | -2.666104000 |
| C | -0.026061000 | 4.102133000  | 2.069639000  | H | 5.046680000  | -1.128436000 | -1.604843000 |
| C | 4.134170000  | 0.544480000  | -2.648526000 | H | 1.289165000  | 3.094353000  | 4.367893000  |
| C | -0.326068000 | 3.230797000  | 1.033772000  | H | 1.941487000  | -3.630903000 | -3.914776000 |
| C | -0.907717000 | 4.207294000  | 3.136116000  | H | 0.028340000  | 1.452558000  | 3.004404000  |
| C | -1.481242000 | 2.460948000  | 0.963476000  | H | 6.744780000  | -0.660462000 | 0.440104000  |
| C | -2.079813000 | 3.462862000  | 3.121481000  | H | 4.271001000  | 1.209340000  | 2.945060000  |
| C | -3.274558000 | 0.940366000  | -0.469275000 | H | 2.617216000  | 1.963403000  | 4.601614000  |
| C | -2.351486000 | 2.624033000  | 2.041835000  | H | 4.162503000  | -3.936316000 | -3.099555000 |
| C | -5.742273000 | -0.260968000 | -0.978666000 | H | 7.070603000  | 0.916512000  | 2.341554000  |
| C | 1.906930000  | -2.586462000 | -4.234858000 | H | 5.208622000  | -3.513119000 | -1.741501000 |
| C | 1.540628000  | -1.653170000 | -3.090171000 | H | 0.414987000  | 0.734211000  | 4.565884000  |
| C | 4.269223000  | -0.940992000 | -2.349800000 | H | 2.165285000  | -3.943126000 | -1.529021000 |
| C | -3.374594000 | -0.457426000 | -0.502353000 | H | 2.110503000  | -1.771408000 | 0.838148000  |
| C | -4.610715000 | -1.034121000 | -0.751609000 | H | 5.347251000  | -0.083766000 | 3.500386000  |
| C | 6.739235000  | 1.288835000  | 1.369288000  | H | 4.352737000  | -5.055525000 | -1.751134000 |
| C | 6.067592000  | 0.193062000  | 0.546913000  | H | 3.182530000  | -3.473128000 | -0.206395000 |
| C | 1.818203000  | 2.253706000  | 3.912959000  | H | 5.167455000  | -2.642060000 | 0.461090000  |
| C | -1.922014000 | -2.467493000 | -2.445379000 | H | 3.102056000  | -0.166506000 | 4.700234000  |
| C | 0.847926000  | 1.113386000  | 3.635918000  | H | 6.945201000  | -1.985436000 | 2.212042000  |
| C | -1.467104000 | -2.342080000 | -1.131165000 | H | -0.129787000 | -1.967121000 | 2.610508000  |
| C | -1.516395000 | -3.491887000 | -3.300775000 | H | 3.995010000  | -2.797030000 | 1.751621000  |
| C | 4.404860000  | 0.125730000  | 2.987362000  | H | 3.397104000  | -1.622588000 | 3.759786000  |
| C | 4.265135000  | -3.996811000 | -2.013582000 | H | 5.750823000  | -2.322124000 | 3.469933000  |
| C | 3.070435000  | -3.389173000 | -1.286873000 | H | 1.431891000  | -2.656771000 | 2.928813000  |
| C | -2.343270000 | -1.856444000 | 1.378157000  | H | -0.374840000 | -1.277463000 | 5.021469000  |
| C | -2.300150000 | -1.120868000 | 2.556634000  | H | 6.311219000  | -3.618318000 | 2.415876000  |
| C | 3.230709000  | -0.543239000 | 3.681768000  | H | 1.264154000  | -1.851588000 | 5.373427000  |
| C | -0.581966000 | -3.337380000 | -0.722998000 | H | -0.006174000 | -2.992026000 | 4.923147000  |
| C | -0.651591000 | -4.472021000 | -2.835007000 | N | -1.007777000 | 0.066988000  | -0.079016000 |
| C | 4.911424000  | -2.275907000 | 1.460704000  | N | 0.228879000  | -0.005273000 | 0.027311000  |
| C | -2.804217000 | -1.547536000 | 3.778324000  | B | -1.779856000 | 1.480953000  | -0.299993000 |
| C | -2.925965000 | -3.119465000 | 1.527013000  | B | -2.013718000 | -1.209821000 | -0.101152000 |
| C | -0.201443000 | -4.406214000 | -1.523540000 | F | -0.737551000 | 3.916220000  | -5.489006000 |
| C | 0.746068000  | -1.864438000 | 3.249556000  | F | -1.505496000 | 5.462913000  | -3.373406000 |
| C | 6.041335000  | -2.558293000 | 2.442674000  | F | -1.924298000 | 4.391028000  | -0.992413000 |
| C | -3.376217000 | -2.807622000 | 3.872438000  | F | -0.420336000 | 1.218626000  | -5.126383000 |
| C | -3.430559000 | -3.600015000 | 2.732646000  | F | -4.334123000 | 3.056412000  | -0.680704000 |
| C | 0.393507000  | -1.993033000 | 4.724348000  | F | -6.727500000 | 1.878244000  | -1.160272000 |
| H | 1.830506000  | 3.682857000  | -4.263713000 | F | 1.115157000  | 4.808922000  | 2.072729000  |
| H | 2.896894000  | 4.235605000  | -2.974375000 | F | 0.577243000  | 3.187878000  | 0.030695000  |
| H | 3.415365000  | 2.937411000  | -4.061602000 | F | -0.608688000 | 4.987003000  | 4.179490000  |
| H | 2.705452000  | 4.406970000  | -0.529170000 | F | -0.816236000 | 0.128666000  | -2.765861000 |
| H | 1.106381000  | 2.786330000  | -2.005172000 | F | -2.929714000 | 3.550196000  | 4.147324000  |
| H | 4.228218000  | 4.619522000  | 0.344588000  | F | -6.927599000 | -0.831624000 | -1.226210000 |
| H | 1.445976000  | 1.526691000  | -3.164645000 | F | -3.503428000 | 1.951713000  | 2.114489000  |
| H | 4.623337000  | 3.240709000  | -1.715696000 | F | -2.785489000 | -1.596863000 | -2.971607000 |
| H | 3.670508000  | 0.683483000  | -3.629381000 | F | -1.946999000 | -3.537144000 | -4.564124000 |
| H | 5.110834000  | 1.036622000  | -2.690964000 | F | -4.754638000 | -2.373723000 | -0.796107000 |

|   |              |              |              |   |              |              |              |
|---|--------------|--------------|--------------|---|--------------|--------------|--------------|
| F | -1.678930000 | 0.073881000  | 2.581431000  | F | -3.965004000 | -4.822083000 | 2.803803000  |
| F | -2.696232000 | -0.771510000 | 4.866606000  | P | 3.033300000  | 1.456206000  | -1.419171000 |
| F | -0.236111000 | -5.453974000 | -3.639001000 | P | 2.683704000  | -1.602331000 | -1.638540000 |
| F | -0.080439000 | -3.336838000 | 0.528037000  | P | 4.449432000  | -0.483963000 | 1.233358000  |
| F | -3.023642000 | -3.967642000 | 0.493219000  | P | 1.623568000  | -0.316353000 | 2.743659000  |
| F | 0.619196000  | -5.364219000 | -1.057889000 | W | 2.033069000  | -0.132595000 | 0.313006000  |
| F | -3.849021000 | -3.255559000 | 5.036492000  |   |              |              |              |

## 5.6.2 Compound 10

|   |              |              |              |   |              |              |              |
|---|--------------|--------------|--------------|---|--------------|--------------|--------------|
| W | -2.061879000 | 0.189679000  | 0.179400000  | C | -4.825848000 | 1.304112000  | 3.131531000  |
| P | -2.254204000 | -1.592453000 | -1.555225000 | C | -5.741370000 | 0.508657000  | -0.961199000 |
| P | -1.673648000 | 2.590973000  | 0.484699000  | C | 5.873636000  | -0.133747000 | 1.685361000  |
| P | -4.445663000 | 0.974864000  | 0.294911000  | C | -6.312650000 | -0.886745000 | -0.725884000 |
| P | -2.196637000 | -1.861593000 | 1.554763000  | C | 4.309583000  | -0.352250000 | 3.487855000  |
| F | 6.634024000  | -0.441785000 | 3.903308000  | C | 2.885744000  | 2.634137000  | -0.301580000 |
| F | 3.409038000  | 4.941115000  | -0.474529000 | C | 4.800637000  | -0.004282000 | 0.813728000  |
| F | 7.132880000  | -0.090256000 | 1.239775000  | H | -3.494082000 | -2.477369000 | -3.446391000 |
| F | 3.488210000  | -2.709087000 | -4.036136000 | H | -4.504794000 | -1.476453000 | -2.417647000 |
| F | 2.030475000  | -0.257075000 | 3.119326000  | H | -3.447038000 | 3.491331000  | 1.865835000  |
| F | 4.056743000  | -0.521811000 | 4.791006000  | H | -3.158873000 | 4.552242000  | 0.848631000  |
| F | 1.422519000  | -4.827692000 | -0.362016000 | H | 0.105530000  | -1.902654000 | -1.788880000 |
| F | 2.422318000  | -4.948488000 | -2.909680000 | H | -0.538768000 | -0.892744000 | -3.041250000 |
| F | 1.181273000  | 2.766114000  | -4.017075000 | H | -2.322530000 | -4.060954000 | -1.490049000 |
| F | 5.094751000  | 0.169224000  | -0.486816000 | H | -3.673084000 | -3.324758000 | -0.625055000 |
| F | 3.556487000  | -0.418095000 | -2.705555000 | H | -4.159210000 | -0.296456000 | -4.579009000 |
| N | -0.204444000 | 0.057798000  | 0.376838000  | H | -2.406200000 | -0.440256000 | -4.422814000 |
| F | 3.418277000  | 2.691332000  | 0.928899000  | H | -3.293874000 | 0.594652000  | -3.307646000 |
| F | 1.114077000  | 0.521352000  | -2.605562000 | H | -4.326639000 | 2.980984000  | -1.029521000 |
| F | 2.312397000  | 5.021369000  | -2.974706000 | H | -5.395317000 | 3.253038000  | 0.355645000  |
| F | 1.485156000  | -2.555275000 | 0.997398000  | H | 0.286885000  | -2.999336000 | -4.055790000 |
| N | 0.918447000  | 0.071805000  | 0.751200000  | H | -0.694087000 | -3.978051000 | -2.975078000 |
| C | -3.530384000 | -1.525071000 | -2.905828000 | H | -1.467097000 | -2.987843000 | -4.223752000 |
| C | -3.273721000 | 3.506205000  | 0.787635000  | H | -0.751853000 | -3.371596000 | 0.355311000  |
| C | -0.695464000 | -1.841529000 | -2.526428000 | H | -2.078884000 | -4.284630000 | 1.066678000  |
| C | -2.591293000 | -3.161974000 | -0.792880000 | H | -0.443852000 | -1.109170000 | 4.831993000  |
| C | 3.465470000  | -0.034381000 | 1.212339000  | H | -2.188293000 | -1.282425000 | 4.588577000  |
| C | 2.461424000  | -3.804592000 | -2.223921000 | H | -1.292325000 | -0.006558000 | 3.745532000  |
| C | 1.978723000  | -2.524807000 | -0.257442000 | H | -0.905164000 | 4.074999000  | -2.951060000 |
| C | -3.338036000 | -0.350203000 | -3.857288000 | H | -1.615300000 | 2.501220000  | -2.558883000 |
| C | -4.428515000 | 2.835314000  | 0.051388000  | H | -2.505703000 | 3.991891000  | -2.203688000 |
| C | 5.623030000  | -0.312134000 | 3.041409000  | H | -4.798826000 | -3.714916000 | 3.690511000  |
| C | 2.996975000  | -2.657310000 | -2.794541000 | H | -3.084154000 | -3.504560000 | 4.050074000  |
| C | -0.651842000 | -3.015955000 | -3.494195000 | H | -3.585208000 | -4.456196000 | 2.649105000  |
| C | 2.999891000  | -1.461581000 | -2.079773000 | H | -0.882178000 | -3.014934000 | 3.239331000  |
| C | 3.262304000  | -0.214988000 | 2.578076000  | H | 0.005047000  | -1.698669000 | 2.465874000  |
| C | 2.889482000  | 3.833391000  | -1.012294000 | H | -4.063822000 | -1.424169000 | 2.984987000  |
| C | 1.953509000  | -3.738255000 | -0.934182000 | H | -4.548498000 | -2.355677000 | 1.582486000  |
| C | -1.832216000 | -3.368324000 | 0.522109000  | H | 0.262389000  | 2.292049000  | 1.830937000  |
| C | -1.243751000 | -1.041836000 | 4.089433000  | H | -0.116769000 | 4.010230000  | 1.711629000  |
| C | -1.510600000 | 3.534442000  | -2.218497000 | H | -5.692485000 | -0.268134000 | 1.938639000  |
| C | -3.813632000 | -3.563024000 | 3.237595000  | H | -6.424459000 | 1.308181000  | 1.663995000  |
| C | -0.950216000 | -1.969603000 | 2.918720000  | H | -0.427719000 | 3.012663000  | 4.060585000  |
| C | -3.803926000 | -2.300500000 | 2.384445000  | H | -1.754830000 | 2.041641000  | 3.415879000  |
| C | 1.766117000  | 2.728318000  | -2.813722000 | H | -1.878572000 | 3.808053000  | 3.444508000  |
| B | 2.314132000  | 0.055122000  | 0.063327000  | H | 0.162054000  | 3.183772000  | -0.891912000 |
| C | 2.336710000  | 3.879138000  | -2.285450000 | H | -0.782755000 | 4.609551000  | -0.478591000 |
| C | -0.551192000 | 3.023144000  | 1.902791000  | H | -5.431366000 | 1.028768000  | 4.001088000  |
| C | 1.759622000  | 1.564643000  | -2.056138000 | H | -3.824882000 | 0.883870000  | 3.260228000  |
| C | -5.470389000 | 0.798526000  | 1.848046000  | H | -4.729339000 | 2.392824000  | 3.133979000  |
| C | -1.193975000 | 2.969951000  | 3.281152000  | H | -5.250363000 | 0.577788000  | -1.936079000 |
| C | 2.353155000  | 1.445062000  | -0.800551000 | H | -6.539511000 | 1.260134000  | -0.943210000 |
| C | 2.441406000  | -1.330817000 | -0.808636000 | H | -6.878607000 | -1.236944000 | -1.594696000 |
| C | -0.854535000 | 3.579746000  | -0.849172000 | H | -5.516053000 | -1.612877000 | -0.528593000 |



H -6.988804000 -0.901819000 0.133089000 H -2.199343000 0.928562000 -1.407519000  
H -2.288557000 0.632026000 1.857420000

5.7 Visualization of pertinent pre-orthogonal Natural Localized Molecular Orbitals and Natural Bond Orbitals (pNLMOs and pNBOs)

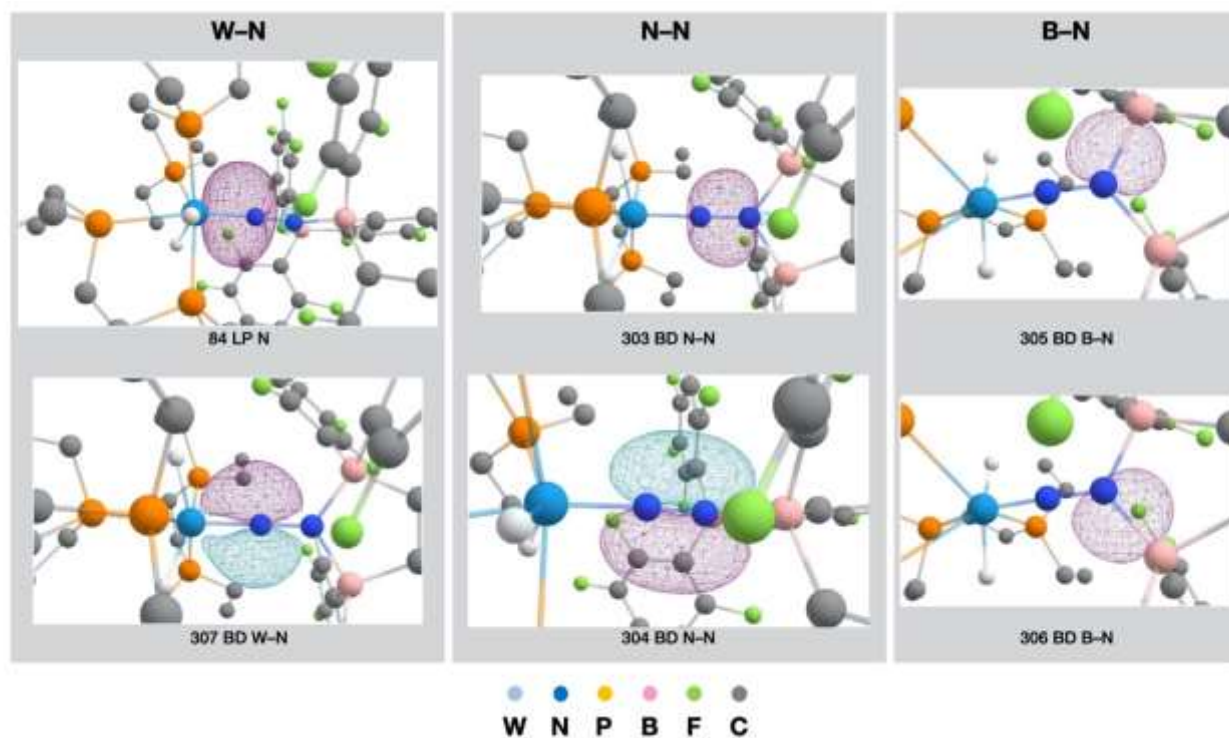

Figure S51. Depiction of key pNLMOs involved in the bonding of the  $N_2$  unit of 7.

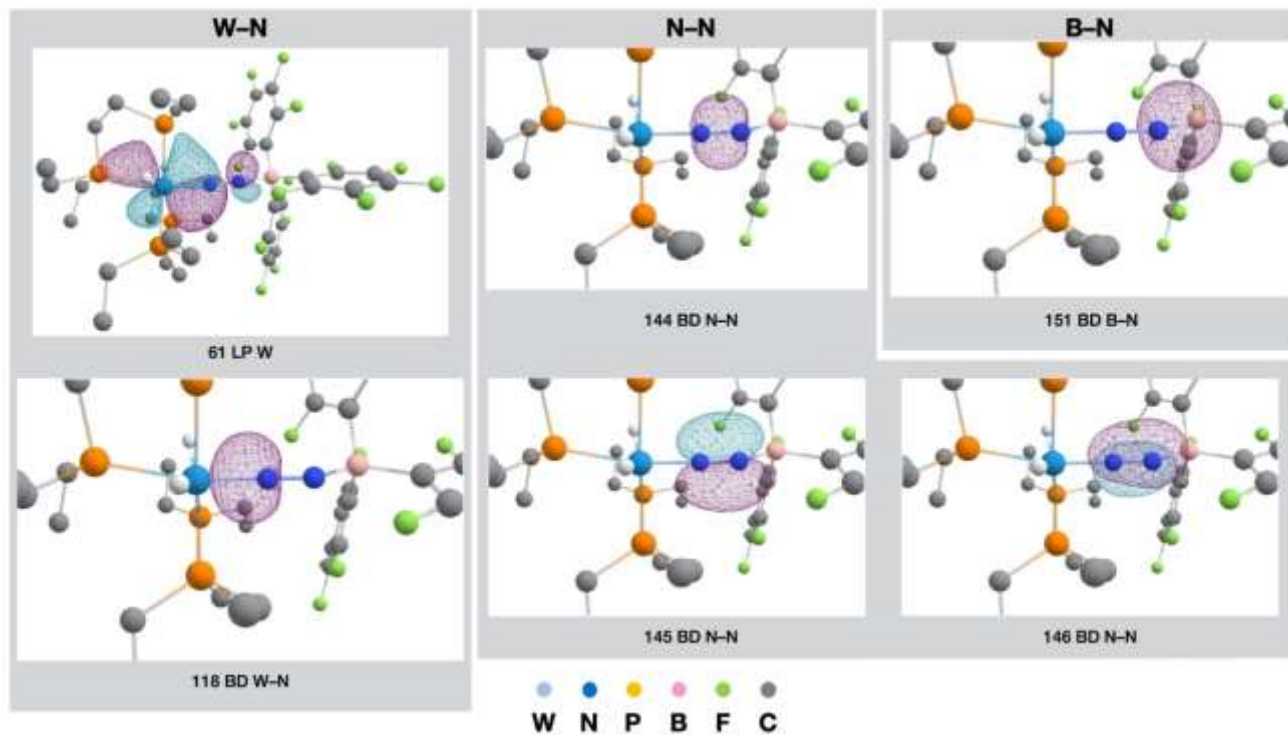

Figure S52. Depiction of key pNLMOs involved in the bonding of the  $N_2$  unit of 10.

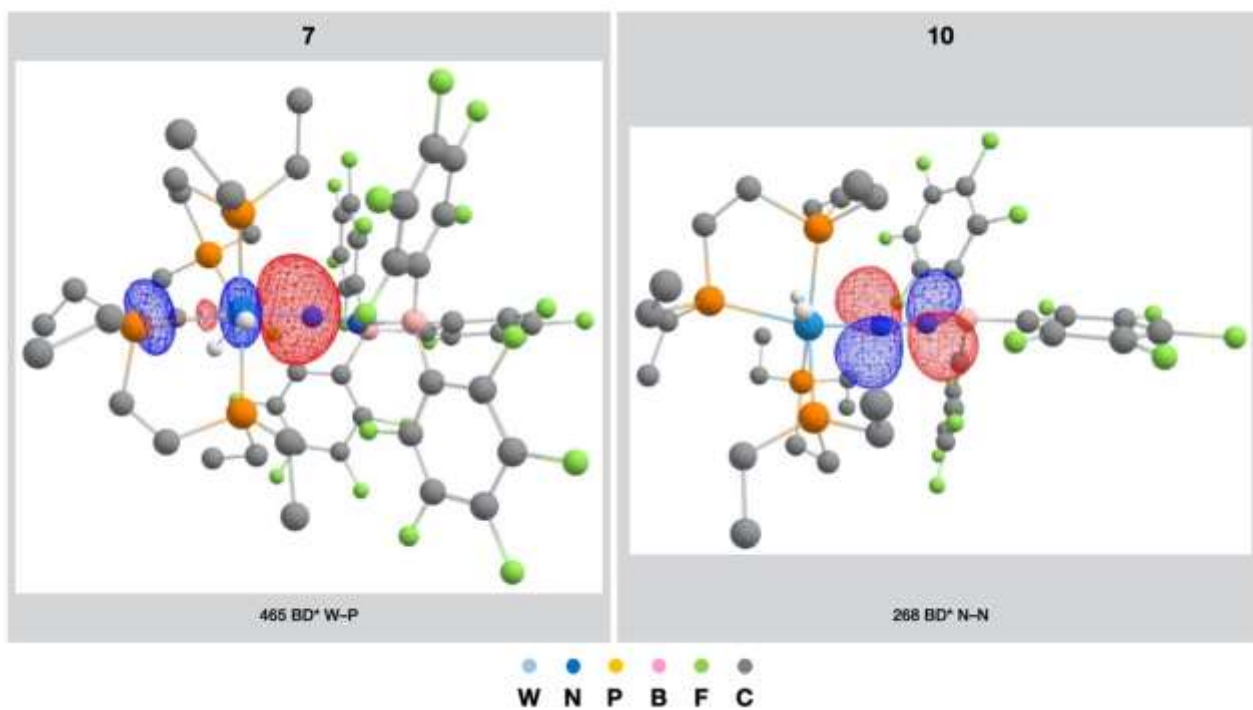

**Figure S53.** Depiction of key pNBOs for **7** and **10** involved in the stabilization of the lone pairs according to second-order perturbation theory.

**Table S7.** Key parameters issued by NBO analysis on **7** to explain the W–N–N–B bonding. LP = one-center valence lone pair, BD = two-center bond (Lewis NBO), BD\* = two-center antibond (non-Lewis NBO), NHO = Natural Hybrid Orbital.

| NBO Atom A(–Atom B) |                          |      |                                                       | NHO atom A                  |    |     |    |      |                    | NHO atom B                  |      |      |      |      |                    |
|---------------------|--------------------------|------|-------------------------------------------------------|-----------------------------|----|-----|----|------|--------------------|-----------------------------|------|------|------|------|--------------------|
| Number              | e <sup>-</sup> occupancy | Type | Localization<br>P–W–N <sub>α</sub> –N <sub>β</sub> –B | % of NBO on NHO<br>(atom A) | %s | %p  | %d | %f   | NHO                | % of NBO on NHO<br>(atom B) | %s   | %p   | %d   | %f   | NHO                |
| 84                  | 1.61460                  | LP   | N <sub>α</sub>                                        | 100 (N <sub>α</sub> )       | 55 | 45  | 0  | n.a. | sp <sup>0.81</sup> | n.a.                        | n.a. | n.a. | n.a. | n.a. | n.a.               |
| 303                 | 1.98579                  | BD   | N <sub>α</sub> –N <sub>β</sub>                        | 50 (N <sub>α</sub> )        | 44 | 56  | 0  | n.a. | sp <sup>1.25</sup> | 50 (N <sub>β</sub> )        | 29   | 71   | 0    | n.a. | sp <sup>2.42</sup> |
| 304                 | 1.96622                  | BD   | N <sub>α</sub> –N <sub>β</sub>                        | 41 (N <sub>α</sub> )        | 0  | 100 | 0  | n.a. | p                  | 59 (N <sub>β</sub> )        | 0    | 100  | 0    | n.a. | p                  |
| 305                 | 1.91295                  | BD   | N <sub>β</sub> –B                                     | 77 (N <sub>β</sub> )        | 35 | 65  | 0  | n.a. | sp <sup>1.85</sup> | 23 (B)                      | 20   | 80   | 0    | n.a. | sp <sup>3.98</sup> |
| 306                 | 1.91926                  | BD   | N <sub>β</sub> –B'                                    | 77 (N <sub>β</sub> )        | 36 | 64  | 0  | n.a. | sp <sup>1.80</sup> | 23 (B')                     | 21   | 79   | 0    | n.a. | sp <sup>3.87</sup> |
| 307                 | 1.94215                  | BD   | W–N <sub>α</sub>                                      | 39 (W)                      | 2  | 0   | 98 | 0    | d                  | 61 (N <sub>α</sub> )        | 0    | 100  | 0    | n.a. | p                  |
| 465                 | 0.44703                  | BD*  | P–W                                                   | 25 (P)                      | 39 | 60  | 0  | n.a. | sp <sup>1.54</sup> | 75                          | 24   | 0    | 76   | 0    | sd <sup>3.16</sup> |

**Table S8.** Key parameters issued by NBO analysis on **10** to explain the W–N–N–B bonding. LP = one-center valence lone pair, BD = two-center bond (Lewis NBO), BD\* = two-center antibond (non-Lewis NBO), NHO = Natural Hybrid Orbital.

| NBO Atom A(–Atom B) |                          |      |                                                       | NHO atom A                  |    |     |    |      |                    | NHO atom B                  |      |      |      |      |                    |
|---------------------|--------------------------|------|-------------------------------------------------------|-----------------------------|----|-----|----|------|--------------------|-----------------------------|------|------|------|------|--------------------|
| Number              | e <sup>-</sup> occupancy | Type | Localization<br>P–W–N <sub>α</sub> –N <sub>β</sub> –B | % of NBO on NHO<br>(atom A) | %s | %p  | %d | %f   | NHO                | % of NBO on NHO<br>(atom B) | %s   | %p   | %d   | %f   | NHO                |
| 61                  | 1.40277                  | LP   | W                                                     | 100 (W)                     | 1  | 0   | 99 | 0    | d                  | n.a.                        | n.a. | n.a. | n.a. | n.a. | n.a.               |
| 118                 | 1.93903                  | BD   | W–N <sub>α</sub>                                      | 22 (W)                      | 28 | 0   | 72 | 0    | sd <sup>2.55</sup> | 78 (N <sub>α</sub> )        | 59   | 41   | 0    | n.a. | sp <sup>0.69</sup> |
| 144                 | 1.96622                  | BD   | N <sub>α</sub> –N <sub>β</sub>                        | 51 (N <sub>α</sub> )        | 39 | 61  | 0  | n.a. | sp <sup>1.54</sup> | 49 (N <sub>β</sub> )        | 37   | 63   | 0    | n.a. | sp <sup>1.70</sup> |
| 145                 | 1.97116                  | BD   | N <sub>α</sub> –N <sub>β</sub>                        | 44 (N <sub>α</sub> )        | 0  | 100 | 0  | n.a. | p                  | 56 (N <sub>β</sub> )        | 2    | 98   | 0    | n.a. | p                  |
| 146                 | 1.96743                  | BD   | N <sub>α</sub> –N <sub>β</sub>                        | 40 (N <sub>α</sub> )        | 1  | 99  | 0  | n.a. | p                  | 60 (N <sub>β</sub> )        | 3    | 97   | 0    | n.a. | p                  |
| 151                 | 1.97095                  | BD   | N <sub>β</sub> –B                                     | 76 (N <sub>β</sub> )        | 58 | 42  | 0  | n.a. | sp <sup>0.72</sup> | 24 (B)                      | 21   | 79   | 0    | n.a. | sp <sup>3.79</sup> |
| 268                 | 0.52117                  | BD*  | N <sub>α</sub> –N <sub>β</sub>                        | 56 (N <sub>α</sub> )        | 0  | 100 | 0  | n.a. | p                  | 44                          | 2    | 98   | 0    | n.a. | p                  |

## 6 References

- S1. *trans*-W(dppe)<sub>2</sub>(N<sub>2</sub>)<sub>2</sub> prepared from WCl<sub>4</sub>(PPh<sub>3</sub>)<sub>2</sub>: (a) J. R. Dilworth, R. L. Richards, G. J.-J. Chen and J. W. McDonald, in *Inorganic Syntheses*, John Wiley & Sons, Inc., 1980, pp. 119–127. *trans*-W(depe)<sub>2</sub>(N<sub>2</sub>)<sub>2</sub> prepared from WCl<sub>6</sub>: (b) A. Coffinet, D. Specklin, L. Vendier, M. Etienne and A. Simonneau, *Chem. Eur. J.*, 2019, **25**, 14300–14303. *trans*-W(depe)<sub>2</sub>(<sup>15</sup>N<sub>2</sub>)<sub>2</sub> prepared from *trans*-WCl<sub>2</sub>(depe)<sub>2</sub>: (c) A. C. Filippou, G. Schnakenburg, A. I. Philippopoulos and N. Weidemann, *Angew. Chem. Int. Ed.*, 2005, **44**, 5979–5985.
- S2. V. C. Williams, W. E. Piers, W. Clegg, M. R. J. Elsegood, S. Collins and T. B. Marder, *J. Am. Chem. Soc.*, 1999, **121**, 3244–3245.
- S3. (a) R. K. Harris, E. D. Becker, S. M. Cabral de Menezes, R. Goodfellow and P. Granger, *Pure Appl. Chem.*, 2001, **73**, 1795–1818; (b) R. K. Harris, E. D. Becker, S. M. Cabral de Menezes, P. Granger, R. E. Hoffman and K. W. Zilm, *Pure Appl. Chem.*, 2008, **80**, 59–84.
- S4. SHELX97 [Includes SHELXS97, SHELXL97, CIFTAB] - Programs for Crystal Structure Analysis (Release 97-2). G. M. Sheldrick, Institut für Anorganische Chemie der Universität, Tammanstrasse 4, D-3400 Göttingen, Germany, 1998.
- S5. L. J. Farrugia, *J. Appl. Crystallogr.*, 1999, **32**, 837–838.
- S6. P. W. Betteridge, J. R. Carruthers, R. I. Cooper, K. Prout and D. J. Watkin, *J. Appl. Cryst.*, 2003, **36**, 1487–1487.
- S7. International Tables for X-Ray Crystallography Vol. IV, Kynoch press, Birmingham, England, 1974.
- S8. C. F. Macrae, I. Sovago, S. J. Cottrell, P. T. A. Galek, P. McCabe, E. Pidcock, M. Platings, G. P. Shields, J. S. Stevens, M. Towler and P. A. Wood, *J Appl Cryst*, 2020, **53**, 226–235.
- S9. Becke, A. D., Density-functional thermochemistry. III. The role of exact exchange. *J. Chem. Phys.* **1993**, *98*, 5648-5652.
- S10. Gaussian 16, Revision C.01, M. J. Frisch, G. W. Trucks, H. B. Schlegel, G. E. Scuseria, M. A. Robb, J. R. Cheeseman, G. Scalmani, V. Barone, G. A. Petersson, H. Nakatsuji, X. Li, M. Caricato, A. V. Marenich, J. Bloino, B. G. Janesko, R. Gomperts, B. Mennucci, H. P. Hratchian, J. V. Ortiz, A. F. Izmaylov, J. L. Sonnenberg, D. Williams-Young, F. Ding, F. Lipparini, F. Egidi, J. Goings, B. Peng, A. Petrone, T. Henderson, D. Ranasinghe, V. G. Zakrzewski, J. Gao, N. Rega, G. Zheng, W. Liang, M. Hada, M. Ehara, K. Toyota, R. Fukuda, J. Hasegawa, M. Ishida, T. Nakajima, Y. Honda, O. Kitao, H. Nakai, T. Vreven, K. Throssell, J. A. Montgomery, Jr., J. E. Peralta, F. Ogliaro, M. J. Bearpark, J. J. Heyd, E. N. Brothers, K. N. Kudin, V. N. Staroverov, T. A. Keith, R. Kobayashi, J. Normand, K. Raghavachari, A. P. Rendell, J. C. Burant, S. S. Iyengar, J. Tomasi, M. Cossi, J. M. Millam, M. Klene, C. Adamo, R. Cammi, J. W. Ochterski, R. L. Martin, K. Morokuma, O. Farkas, J. B. Foresman and D. J. Fox, Gaussian, Inc., Wallingford CT, 2016.
- S11. D. Andrae, U. Häußermann, M. Dolg, H. Stoll and H. Preuß, *Theor. Chim. Acta*, 1990, **77**, 123–141.
- S12. A. Bergner, M. Dolg, W. Küchle, H. Stoll and H. Preuß, *Mol. Phys.*, 1993, **80**, 1431–1441.
- S13. (a) A. W. Ehlers, M. Böhme, S. Dapprich, A. Gobbi, A. Höllwarth, V. Jonas, K. F. Köhler, R. Stegmann, A. Veldkamp and G. Frenking, *Chem. Phys. Lett.*, 1993, **208**, 111–114. (b) A. Höllwarth, M. Böhme, S. Dapprich, A. W. Ehlers, A. Gobbi, V. Jonas, K. F. Köhler, R. Stegmann, A. Veldkamp and G. Frenking, *Chem. Phys. Lett.*, 1993, **208**, 237–240.
- S14. P. C. Hariharan and J. A. Pople, *Theor. Chim. Acta*, 1973, **28**, 213–222.
- S15. I. del Rosal, L. Maron, R. Poteau and F. Jolibois, *Dalton Trans.*, 2008, 3959–3970.
- S16. (a) L. Goerigk and S. Grimme, *Phys. Chem. Chem. Phys.*, 2011, **13**, 6670–6688; (b) S. Grimme, S. Ehrlich and L. Goerigk, *J. Comput. Chem.*, 2011, **32**, 1456–1465.
- S17. (a) J. P. Foster and F. Weinhold, *J. Am. Chem. Soc.*, 1980, **102**, 7211–7218; (b) A. E. Reed and F. Weinhold, *J. Chem. Phys.*, 1985, **83**, 1736–1740; (c) A. E. Reed, L. A. Curtiss and F. Weinhold, *Chem. Rev.*, 1988, **88**, 899–926.
- S18. E. D. Glendening, J. K. Badenhoop, A. E. Reed, J. E. Carpenter, J. A. Bohmann, C. M. Morales, C. R. Landis and F. Weinhold, NBO (version 6.0) Theoretical Chemistry Institute, University of Wisconsin, Madison, WI 2013.
- S19. (a) Ö. Öztöpcü, C. Holzhaecker, M. Puchberger, M. Weil, K. Mereiter, L. F. Veiros and K. Kirchner, *Organometallics*, 2013, **32**, 3042–3052; (b) L. A. Wingard, P. S. White and J. L. Templeton, *Dalton Trans.*, 2012, **41**, 11438–11448; (c) A. J. M. Caffyn, S. G. Feng, A. Dierdorf, A. S. Gamble, P. A. Eldredge, M. R. Vossen, P. S. White and J. L. Templeton, *Organometallics*, 1991, **10**, 2842–2848.
- S20. (a) Avogadro: an open-source molecular builder and visualization tool. Version 1.2.0. <http://avogadro.cc/>; (b) M. D. Hanwell, D. E. Curtis, D. C. Lonie, T. Vandermeersch, E. Zurek and G. R. Hutchison, *J. Cheminform.*, 2012, **4**, 17.
